# Supplementary material
Source: publisher figshare collection journal article supplement (https://gsajournals.figshare.com/articles/dataset/_/7882973)
Supplement: Supplementary file 1 [file 1]

Archive with 2 entries (2 files):
- 302143_Table_S1.xlsx
- 302143_Supplemental_Figures.pdf
