# Supplementary material
Source: publisher figshare collection journal article supplement (https://gsajournals.figshare.com/articles/dataset/_/7882973)
Supplement: Supplementary file 1 [file 1 › 302143_Table_S1.xlsx]

## Sheet: S1
Table S1. Genomic datasets used for this study
Generation	Seed package-plant number	Library type	Phenotype	Raw reads	Reads after filteringa	%mapped to W22b	Accession number
Maize W22	41168-4	RNA-seq	Normal	16469983	16294385	0.939	SRR8758914
Maize W22	41168-1	RNA-seq	Normal	17762144	17651234	0.942	SRR8758901
Bravo teosite	M64-5	RNA-seq	Normal	20078080	19998557	0.851	SRR8758902
Bravo teosite	M64-3	RNA-seq	Normal	22279051	22218055	0.871	SRR8758916
W22 × Bravo BC6	3772-1	RNA-seq	Sickly	18710918	18653786	0.945	SRR8758907
W22 × Bravo BC6	3771-4	RNA-seq	Sickly	16573863	16517946	0.941	SRR8758908
W22 × Bravo BC1	1653-1	RNA-seq	Sickly	17618531	17564014	0.929	SRR8758898
Blanco teosinte	M63-2	RNA-seq	Normal	22238497	22178059	0.864	SRR8758915
W22 × Blanco BC6	3805-3	RNA-seq	Normal	21741891	21668661	0.945	SRR8758913
W22 × Blanco BC6	3780-3	RNA-seq	Normal	17055346	17008116	0.948	SRR8758903
W22 × Blanco BC1	1671-3	RNA-seq	Normal	12949093	12915432	0.931	SRR8758904
Teloloapan teosinte	PI384065-1	RNA-seq	Normal	17289203	17036151	0.846	SRR8758900
B73 × Teloloapan BC4	SFG-25-3	RNA-seq	Normal	17632744	17329286	0.874	SRR8758906
B73 × Teloloapan BC1	SFG-35-2	RNA-seq	Normal	19155785	18988954	0.867	SRR8758909
Maize B73	SFG-B73-2	RNA-seq	Normal	15744654	15679649	0.875	SRR8758905
Bravo teosinte	PI384063-3	RNA-seq	Normal	24638732	24541393	0.852	SRR8758910
Bravo teosinte	PI384063-1	RNA-seq	Normal	19236216	19114104	0.85	SRR8758899
B73 × Bravo BC2	FS4070-2	RNA-seq	Sickly	18935754	18881488	0.921	SRR8758917
B73 × Bravo BC2	FS4070-3	RNA-seq	Sickly	18507724	18446697	0.914	SRR8758912
B73 × Bravo BC1	SFG-1-4	RNA-seq	Sickly	18285062	18139682	0.859	SRR8758911
Blanco teositne	M63-1	WGS	Normal	27662249	27658841	0.661	SRR8757032
W22 × Blanco BC6	3805-1	WGS	Normal	20258369	20256933	0.738	SRR8757030
Maize W22	41168-3	WGS	Normal	18658864	18656773	0.719	SRR8757027
Bravo teosinte	M64-4	WGS	Normal	18734526	18733087	0.68	SRR8757029
W22 × Bravo BC6	3772-2	WGS	Sickly	20760205	20757456	0.706	SRR8757031
W22 × Bravo BC1	1653-2	WGS	Sickly	17511782	17510299	0.727	SRR8757028
W22 × Blanco BC1	1671-2	WGS	Normal	20903649	20901705	0.732	SRR8757026
Maize W22	41168-3	WGBS	Normal	251665525	249460475	0.62	SRR8703822
W22 × Bravo BC6	3772-2	WGBS	Sickly	131047798	129729096	0.3	SRR8703820
W22 × Bravo BC1	1653-2	WGBS	Sickly	181075869	179796368	0.58	SRR8703826
Bravo teosinte	M64-4	WGBS	Normal	158078893	156775082	0.38	SRR8703821
W22 × Blanco BC6	3805-1	WGBS	Normal	219600200	217801586	0.58	SRR8703825
W22 × Blanco BC1	1671-2	WGBS	Normal	161486426	159760327	0.56	SRR8703824
Blanco teositne	M63-1	WGBS	Normal	193735893	192099205	0.37	SRR8703823
W22 × Bravo BC1	1653-1	sRNA-Seq	Sickly	3839811	3317542c	0.7374	SRR8759042
W22 × Bravo BC6	3771-4	sRNA-Seq	Sickly	5050655	4386187c	0.7421	SRR8759029
W22 × Bravo BC6	3772-1	sRNA-Seq	Sickly	7011416	6152401c	0.7683	SRR8759035
Bravo teosinte	M64-3	sRNA-Seq	Normal	4369305	3554822c	0.6001	SRR8759034
Bravo teosinte	M64-5	sRNA-Seq	Normal	6094083	5355885c	0.667	SRR8759046
W22 × Blanco BC1	1671-3	sRNA-Seq	Normal	6379041	5625285c	0.7623	SRR8759032
W22 × Blanco BC6	3780-3	sRNA-Seq	Normal	4861738	4275829c	0.7781	SRR8759039
W22 × Blanco BC6	3805-3	sRNA-Seq	Normal	6326851	5070901c	0.7121	SRR8759028
Blanco teosinte	M63-2	sRNA-Seq	Normal	4103999	3593419c	0.6697	SRR8759037
Maize W22	41168-1	sRNA-Seq	Normal	3644216	3120801c	0.7656	SRR8759038
Maize W22	41168-4	sRNA-Seq	Normal	2923578	2396114c	0.7264	SRR8759044
B73 × Bravo BC1	SFG-1-4	sRNA-Seq	Sickly	5351362	4646279c	73.98%d	SRR8759043
B73 × Bravo BC2	FS4070-2	sRNA-Seq	Sickly	10364748	7237466c	63.37%d	SRR8759036
Bravo teosinte	PI384063-3	sRNA-Seq	Normal	4806489	4050906c	64.50%d	SRR8759030
Bravo teosinte	PI384063-1	sRNA-Seq	Normal	4259991	3665410c	69.24%d	SRR8759031
B73 × Teloloapan BC1	SFG-35-2	sRNA-Seq	Normal	4817271	4206066c	75.61%d	SRR8759040
B73 × Teloloapan BC4	SFG-25-3	sRNA-Seq	Normal	5263312	4155167c	71.43%d	SRR8759045
Teloloapan teosinte	PI384065-1	sRNA-Seq	Normal	3528411	3056448c	67.87%d	SRR8759041
Maize B73	SFG-B73-2	sRNA-Seq	Normal	3960383	3325972c	75.35%d	SRR8759033
aFiltering includes trimming of adaptors, removal of sequences without quality scores >33 and removal of trimmed reads shorter than 70bp
b# of reads mapped (unique and multi-mapping) to the W22 genome
cThe sRNA-seq reads were filtered by requiring a perfect match to the adaptor sequence and removing all reads mapped to rRNA, tRNA and known miRNA
dFor these samples the alignments were done to the B73 genome

## Sheet: S2
Table S2. Regions with elevated read depth in Bravo BC samples.
Chromosome	Start	End	BravoBC6_cpm	BravoBC1_cpm	BlancoBC6_cpm	BlancoBC1_cpm	Bravo_cpm	Blanco_cpm	W22_cpm
1	3108501	3110500	40.7156	60.3843	5.32241	4.96339	3.3331	4.82031	4.41545
1	271485501	271489500	130.896	188.257	9.97953	8.93411	0	6.54185	9.19886
1	271490501	271493000	56.5308	73.0137	2.32856	2.97804	0	2.41016	6.62318
2	111262501	111263500	9.08531	9.86671	0.997953	0.661786	1.90463	0	1.47182
2	237122501	237124500	48.1185	72.2243	4.65711	3.63982	8.09467	2.75447	4.78341
2	237142501	237144500	24.2275	50.1229	2.66121	2.31625	3.3331	4.82031	1.10386
4	89975001	89977500	41.3886	69.067	9.97953	4.6325	10.9516	5.50893	4.0475
4	208645001	208647500	41.7251	71.435	5.98772	3.63982	8.57083	5.50893	2.57568
5	101959001	101962000	86.4787	121.953	2.32856	1.65446	0.952314	1.37723	1.83977
6	54851501	54855500	63.5972	88.0111	6.98567	3.30893	2.38079	6.88616	5.88727
6	154557001	154560000	77.7299	100.246	8.98157	7.61053	1.90463	6.54185	7.35909
9	104991001	104993000	18.8436	21.3121	2.66121	2.64714	2.85694	1.03292	0.735909
9	105059501	105062000	98.2559	146.422	2.66121	4.96339	3.3331	2.75447	4.41545
9	105063501	105070000	113.398	164.182	8.31627	6.28696	5.71389	14.1166	5.88727
9	105105501	105109500	93.8815	123.926	7.98362	12.243	12.3801	6.88616	7.35909
9	105138001	105141500	14.8057	24.0748	1.66325	1.32357	1.90463	1.37723	1.47182
9	105172501	105177500	157.142	236.406	11.3101	8.93411	16.6655	7.57478	11.7745
9	105183501	105188000	97.9194	139.713	13.9713	10.5886	21.4271	6.54185	11.4066
9	105206501	105209000	17.8341	27.2321	4.65711	1.65446	2.85694	1.03292	1.47182

## Sheet: S3
Table S3. 18 DE genes in Bravo lines
W22_gene	W22_coordinates	B73_V4	B73_V3	Colinear relative to sorghum?	In CNVSeq region?	RNAseq supports full length transcript?	Sickly FPKM	Non-sickly FPKM	Sickly WGS	Non-sickly WGS	GO_description
Zm00004b000077	1:3104793-3109738	Zm00001d027329	GRMZM2G137366	Yes	Yes		3.02176	1.07025	12.4242	1.27291	DNA (cytosine-5-)-methyltransferase activity ; nucleoplasm ; integral component of membrane ; methylation-dependent chromatin silencing ; transcription, DNA-templated ; one-carbon metabolic process ; developmental process ; post-translational protein modification ; defense response to fungus ; chromosome organization ; histone H3-K9 methylation ; multi-organism process ; C-5 methylation of cytosi…
Zm00004b008026	2:111280255-111282566	Zm00001d004435	GRMZM2G410764	No	Yes		30.1394	0.560117	0.145887	0.0603932	nucleic acid binding ; RNA processing ; response to stress
Zm00004b008123	2:118461738-118465316	Zm00001d004554	GRMZM2G318681	Yes	No		3.48563	0.852472	3.0962	2.91795	cytoplasm ; cytoskeleton ; thylakoid ; membrane ; cell projection ; protein complex ; organelle part ; phagocytosis ; response to stress ; signal transduction ; determination of bilateral symmetry ; polarity specification of adaxial/abaxial axis ; meristem initiation ; regulation of meristem growth ; actin cytoskeleton organization ; macromolecular complex assembly
Zm00004b010557	2:237087310-237088352	NA	NA	No	Yes		45.6712	1.14148	79.7961	2.34737	NA
Zm00004b010558	2:237119794-237123732	NA	NA	No	Yes		11.0745	1.01363	4.08306	0.752367	NA
Zm00004b018125	3:170180588-170182415	NA	NA	No	No		123.158	0.963321	2.90718	0.169095	NA
Zm00004b020288	4:4641200-4648519	NA	NA	No	No		2.81786	1.08791	1.46865	0.91155	NA
Zm00004b020784	4:30425065-30430359	Zm00001d049471	GRMZM2G309109	Yes	No		178.33	2.67173	7.33939	0.857577	recombinational repair ; double-strand break repair ; meiosis I ; macromolecule biosynthetic process ; regulation of metabolic process ; single-organism metabolic process ; regulation of cellular process ; meiotic M phase ; nucleic acid phosphodiester bond hydrolysis ; euchromatin ; synaptonemal complex ; Mre11 complex ; endonuclease activity ; deoxyribonuclease activity ; 3'-5' exonuclease activ…
Zm00004b023544	4:208589866-208647427	Zm00001d052876	GRMZM2G181491	Yes	Yes		221.203	0.915487	4.00356	0.916546	transmembrane transporter activity ; substrate-specific transporter activity ; vacuolar membrane ; plasma membrane ; integral component of membrane ; oligopeptide transport ; response to nematode ; cellular process ; multi-organism process
Zm00004b027253	8:155929432-155936414	Zm00001d011570	GRMZM2G163159	Yes	No	Yes	13.8723	1.27264	2.34167	0.745761	zinc ion binding ; integral component of membrane ; protein ubiquitination ; proteasome-mediated ubiquitin-dependent protein catabolic process ; regulation of biological process
Zm00004b028981	6:62297680-62316395	NA	NA	No	No		15.7708	0.87075	5.00236	5.85327	NA
Zm00004b033005	9:104992759-104994935	NA	NA	No	Yes	Yes	182.372	1.02075	206.033	6.15599	NA
Zm00004b033011	9:105061312-105062639	NA	NA	No	Yes		31.5312	2.07964	344.758	5.68891	NA
Zm00004b033012	9:105065082-105069485	NA	NA	No	Yes	Yes	1446.25	1.17514	29.1661	1.23126	NA
Zm00004b033015	9:105157619-105158883	NA	NA	No	Yes		384.645	2.1313	25.3813	2.46322	NA
Zm00004b033017	9:105164715-105174583	NA	NA	No	Yes	Yes	87.4475	1.4777	24.5924	1.31833	NA
Zm00004b037729	7:181410329-181413754	Zm00001d022648	GRMZM2G124745	No	No		61.6554	0.604014	1.09467	0.053865	double-stranded RNA binding ; hydrolase activity, hydrolyzing O-glycosyl compounds ; nucleus ; cytoplasm ; integral component of membrane ; carbohydrate metabolic process ; biosynthetic process ; gene expression ; RNA metabolic process ; gene silencing by RNA
Zm00004b038361	10:34551765-34556460	Zm00001d024018	GRMZM2G088539	No	No		58.6902	0.507175	1.19915	0.454412	zinc ion binding ; DNA repair ; macromolecule biosynthetic process ; gene expression ; RNA metabolic process ; methylation ; cellular biosynthetic process ; regulation of cellular process ; nucleic acid phosphodiester bond hydrolysis ; integral component of membrane ; Smc5-Smc6 complex

## Sheet: S4
Table S4. De novo transcripts up-regulated in dysgenic materials.
Isoform	Transcript length	W22 BLAST alignment	%Identity	%length	Classification of W22 alignment	Feature aligned to	Annotation of aligned region	ORF type	ORF length	PFAM domain	Nearest DMR	Sickly plants avg RNAseq FPKM	Normal plants avg RNAseq FPKM	Sickly plants avg WGS FPKM	Normal plants avg WGS FPKM	Sickly plants avg 24mer CPM	Normal plants avg 24mer CPM
c26_g1_i1	565	chr6:168253357-168252924	99.77	0.768142	Good hit	DH	DHH00002Zm00004b07857				0	16.5425	0.919174	5.43078	1.62828	0	0
c65740_g1_i1	294	chr10:80863163-80863458	98.311	1	Good hit	DH	DHH02961Zm00004b00001					40.3814	2.8137	68.0839	16.1579	9.66667	0.625
c23416_g1_i1	740	chr2:24911313-24911770	98.475	0.62027	Good hit	DH	DHH00181Zm00004b00001					74.5199	0.203011	115.469	2.27898	6.33333	5.375
c15762_g2_i1	214	chr9:105158953-105158825*	97.674	0.602804	Good hit	Gene	Zm00004b033015					14.7816	0.0491028	28.8985	1.64478	0.333333	0.25
c1638_g1_i1	443	chr4:208645932-208646297*	97.82	0.828442	Good hit	Gene	Zm00004b023544					17.7977	0.0393583	50.4271	2.52828	0.333333	0.125
c19794_g1_i3	1274	chr1:261136493-261137197	100	0.553375	Good hit	Gene	Zm00004b004582	5prime_partial	211	B3		4.2199	0.442341	3.0077	2.75476	0	0
c20245_g1_i2	1429	chr10:34544665-34543399	97.877	0.890133	Good hit	Gene	Zm00004b038359	5prime_partial	358			6.12783	0.643632	64.2872	3.35022	6.66667	1
c23765_g3_i1	266	chr3:170180922-170180780	97.203	0.537594	Good hit	Gene	Zm00004b018125					27.3835	0.208797	58.6916	0.620958	276	263.125
c59094_g1_i1	204	chr4:208646898-208646701*	95.098	1	Good hit	Gene	Zm00004b023544					7.5167	0.191823	55.5298	1.02946	0.666667	0.125
c66963_g1_i1	901	chr8:22519755-22518855	99.889	1	Good hit	Gene	Zm00004b025081	3prime_partial	300	DUF4220	0	1.52012	0.387937	3.49893	4.22644	0	0.125
c22909_g1_i3	1421	chr3:235550821-235551715	95.006	0.634061	Good hit	Intergenic	Intergenic	complete	156	DUF724/SMC/zF	0	41.2966	0.0566142	48.7359	1.82117	277.333	0.25
c22909_g2_i1	774	chr10:137245347-137246006	95	0.852713	Good hit	Intergenic	Intergenic	5prime_partial	179			27.9032	2.65436	44.5787	12.9405	111.333	1.25
c45360_g1_i1	213	chr8:160064933-160064721	100	1	Good hit	Intergenic	Intergenic					10.7756	0.238989	1.27456	2.10777	0	0
c45802_g1_i1	357	chr5:3273781-3273425	99.44	1	Good hit	Intergenic	Intergenic				231	16.991	0.0133647	71.8276	10.5111	0.333333	0.125
c66064_g1_i1	232	chr1:271472551-271472324*	99.561	0.982759	Good hit	Intergenic	Intergenic				0	153.161	0.118589	45.3843	10.1974	0.333333	0.125
c23876_g1_i7	1378	chr5:3267192-3267904	98.597	0.517417	Good hit	Intergenic	Intergenic			Glyco_transf_8	1293	79.2123	8.13186	44.8893	8.43985	9	1.75
c11958_g1_i1	366	chr10:147756625-147756990	97.814	1	Good hit	RL	RLX29912Zm00004b00001				0	8.46126	0.0502164	62.9346	8.67145	2	0.5
c17001_g1_i1	574	chr5:101961201-101960769	95.15	0.754355	Good hit	RL	RLX23214Zm00004b00001				0	135.669	0.391914	160.064	0.266961	364.667	0.25
c23147_g1_i2	6199	chr5:33759219-33753031	99.354	0.998709	Good hit	RL	RLC00128Zm00004b00020	complete	874	Integrase/Rtase		5.66785	0.310012	363.266	262.991	97.3333	108.375
c24022_g8_i1	408	chr5:115059950-115059675	96.377	0.676471	Good hit	RL	RLG00009Zm00004b00750					2.89988	0	50.6873	14.322	1	0.125
c2447_g1_i1	961	chr2:237142936-237143888*	96.186	1	Good hit	RL	RLX29021Zm00004b00001				0	2.1997	0.0473076	72.1704	3.35506	4.33333	0
c4053_g1_i1	221	chr1:179136794-179137013	97.738	1	Good hit	RL	RLX35720Zm00004b00001					5.644	0.203849	199.578	3.84516	135.667	0.125
c50624_g1_i1	688	chr7:83435658-83434972	99.273	1	Good hit	RL	RLG00009Zm00004b00984					1.92262	0.0173384	132.733	66.8818	0.666667	0.25
c50891_g1_i1	417	chr2:202364759-202365163	96.79	0.971223	Good hit	RL	RLX34804Zm00004b00001	interl	139			9.0852	0.640485	54.8016	7.73857	1.33333	0
c5329_g1_i1	756	chr1:15227544-15228295	99.867	0.994709	Good hit	RL	RLC00128Zm00004b00004					3.61758	0.410387	687.701	473.411	8	7.25
c7147_g1_i1	239	chr9:105062941-105062703*	97.908	1	Good hit	RL	RLX27955Zm00004b00001				3561	5.05822	0.574814	45.126	3.5196	2	1.5
c8524_g1_i1	903	chr7:165665553-165666028	100	0.527132	Good hit	RL	RLX01782Zm00004b00002					9.28733	0.468237	52.2193	2.47061	8.33333	8.75
c11127_g1_i1	1007	NA			No good hit		NA	5prime_partial	245			3.0846	0.0137545	38.95	0.125725	1.33333	0.125
c11341_g1_i1	590	NA			No good hit		NA	3prime_partial	106			39.4259	0.0232348	114.027	0.137189	426.333	0.125
c12633_g1_i1	1649	NA		0.120679	No good hit		NA	3prime_partial	358			67.689	0.0376211	88.6996	0	1	0.125
c13394_g1_i3	2444	NA			No good hit		NA	3prime_partial	508	Transposase_28		30.2694	0.0136653	51.0466	0	3	0
c15762_g1_i1	1402	NA		0.490014	No good hit		NA	complete	226			92.619	0.183262	69.4232	1.78875	3.33333	8.25
c16078_g1_i1	221	NA			No good hit		NA					13.1048	0	39.6559	0.381147	26.6667	0
c16078_g2_i1	437	NA		0.421053	No good hit		NA	5prime_partial	125			9.76653	0	53.3636	0	0.333333	0
c1852_g1_i1	1197	NA			No good hit		NA	complete	202	zf-GRF		101.352	0.186926	66.3125	0	1	0
c20221_g2_i2	247	NA			No good hit		NA			Peptidase/RRM/zF-CCHC		72.9237	14.9467	36.4027	4.06524	4.66667	0.5
c21721_g1_i2	1501	NA		0.318454	No good hit		NA	5prime_partial	130			28.1562	0.0114668	99.1676	0.40972	3884	3.25
c23260_g4_i2	619	NA		0.164782	No good hit		NA					16.106	0.0293255	97.6731	0	3	0.625
c27256_g1_i1	272	NA			No good hit		NA					4.00291	0	26.7858	0	0	0
c58661_g1_i1	1307	NA			No good hit		NA	complete	115			18.7638	0.0413178	69.3058	0.191954	6	0.25
c20824_g1_i1	1756	chr6:154488961-154488518	97.783	0.256834	Partial hit	Gene	Zm00004b030797	5prime_partial	450	Aminotran_3		35.7602	12.213	5.42236	5.95456	0.333333	0.5
c21858_g1_i2	1084	chr8:155934898-155934693	100	0.190037	Partial hit	Gene	Zm00004b027253	complete	180	zf-C3HC4_2		68.7424	2.32125	60.996	2.63789	5	0
c34741_g1_i1	521	chr2:237123159-237122916*	99.18	0.46833	Partial hit	Gene	Zm00004b010558				0	2.40842	0.0157695	44.7025	1.68231	0.666667	0
c16264_g1_i3	1172	chr4:7146156-7146058	100	0.084471	Partial hit	Intergenic	Intergenic	5prime_partial	191			33.8321	0.0559389	63.1171	0.874029	2.66667	0.125
c22909_g3_i1	1849	chr9:105174695-105175164*	97.28	0.258518	Partial hit	Intergenic	Intergenic	complete	282		0	628.94	0.779938	87.9999	5.49179	270.333	240.875
c23260_g5_i1	286	chr9:104992621-104992509*	100	0.395105	Partial hit	Intergenic	Intergenic				1581	20.5127	0.040239	154.797	0	1	0
c64530_g1_i1	1576	chr1:271474894-271475621*	99.451	0.461929	Partial hit	Intergenic	Intergenic	complete	244		2495	348.025	0.375195	68.224	16.3347	2.33333	0.5
c23416_g3_i1	578	chr7:181411971-181411723	95.582	0.430796	Partial hit	RL	RLX19661Zm00004b00001	interl	193		0	38.3567	4.96498	67.7998	1.33943	0	0
c21721_g2_i1	2173	chr7:13881843-13881247	96.321	0.275196	Partial hit	RL	RLX28551Zm00004b00001	5prime_partial	612	Peptidase_C48	0	70.0485	0.0430653	61.4396	0.966552	5.33333	0.25
c23260_g2_i2	2800	chr5:101959481-101960036	98.032	0.199643	Partial hit	RL	RLX23214Zm00004b00001	complete	490		0	346.683	0.285013	155.553	0.849638	129.667	0.75
c23260_g3_i1	256	chr9:105103301-105103242*	98.333	0.234375	Partial hit	RL	RLX27955Zm00004b00001				8843	32.1945	0.0526168	102.525	0	0.666667	0
c23416_g2_i1	4234	chr9:105060337-105060871*	98.324	0.12683	Partial hit	RL	RLX27955Zm00004b00001	complete	1098	Peptidase_C48	5631	19.9477	0.0599556	77.113	0.638899	11	0.375
c12204_g2_i1	380	chr2:101338763-101338556	91.827	0.547368	Weak hit	Gene	Zm00004b007927					5.94117	0	202.525	0.651557	449	7
c13900_g1_i1	320	chr9:105173030-105173338*	94.688	1	Weak hit	Gene	Zm00004b033017				164	15.9642	0.0409202	51.0037	1.11036	0.333333	0
c58833_g1_i1	297	chr4:208646879-208647140*	94.03	0.902357	Weak hit	Gene	Zm00004b023544					7.50898	0.342107	53.4797	0.500327	0.333333	0.125
c6066_g1_i1	217	chr7:171048840-171048955	84.615	0.539171	Weak hit	Gene	Zm00004b037341					5.13808	0	27.1101	0	0.333333	0
c23260_g1_i7	1273	chr10:34550435-34550955	94.318	0.414768	Weak hit	Intergenic	Intergenic	3prime_partial	137	Integrase/Rtase/MYB	0 (4)	63.069	0.209675	96.0817	2.88275	18.6667	5.125
c11995_g1_i1	567	chr7:181413239-181412673	94.376	1.00353	Weak hit	RL	RLX19661Zm00004b00001				0	3.6696	0.129834	67.6252	1.87352	1.33333	0.25
c48606_g1_i1	690	chr5:101960039-101960398	91.579	0.550725	Weak hit	RL	RLX23214Zm00004b00001				0	102.051	0.11315	205.584	0.208448	647.333	1
*Indicates matching to a region of higher read depth identified by CNVseq

## Sheet: S5
Table S5. Comparison of RNAseq read depth per TE families comparing Bravo BCs to Blanco BCs
Family	log2FC	p.value	p.adj	DE_call
DHH00181	4.55775	5.27427e-18	2.92567e-15	up
RLC00128	3.77824	9.12264e-18	3.72356e-15	up
RLG02073	3.18198	5.97319e-18	2.92567e-15	up
RLG12523	3.96992	7.64789e-13	2.34121e-10	up
RLX22156	3.77075	3.68451e-12	1.0026e-09	up
RLX23214	7.85321	1.0159e-73	2.48794e-70	up
RLX27955	4.74364	3.99542e-24	3.26159e-21	up
RLX28013	3.68249	1.31918e-11	3.23067e-09	up
RLX28551	6.29812	5.38429e-40	6.59306e-37	up
RLX29021	4.03752	4.07556e-14	1.42586e-11	up
RLX32527	2.45118	1.44156e-05	0.00320944	up
RLC00284	1.2203	NA	NA	NA
RLG01165	1.58044	NA	NA	NA
RLX02303	1.14503	NA	NA	NA
DHH03487	NA	NA	NA	NA
DTA00031	-1.10763	NA	NA	NA
DTA00199	-1.61649	NA	NA	NA
DTH00001	NA	NA	NA	NA
DTM23554	-1.06783	NA	NA	NA
RLC13987	1.0243	NA	NA	NA
RLC22532	NA	NA	NA	NA
RLG00087	1.21134	NA	NA	NA
RLG00378	1.40393	NA	NA	NA
RLG01088	NA	NA	NA	NA
RLG03519	NA	NA	NA	NA
RLG04269	-1.06039	NA	NA	NA
RLG04606	NA	NA	NA	NA
RLG28373	-1.03657	NA	NA	NA
RLG31810	NA	NA	NA	NA
RLG33900	NA	NA	NA	NA
RLG35007	NA	NA	NA	NA
RLG35863	NA	NA	NA	NA
RLX04311	NA	NA	NA	NA
RLX09846	NA	NA	NA	NA
RLX12383	-1.16507	NA	NA	NA
RLX14771	NA	NA	NA	NA
RLX14860	NA	NA	NA	NA
RLX20751	-1.08776	NA	NA	NA
RLX23965	NA	NA	NA	NA
RLX26871	-1.0367	NA	NA	NA
RLX27974	-1.13586	NA	NA	NA
RLX28856	NA	NA	NA	NA
RLX30121	NA	NA	NA	NA
RLX33902	-1.2832	NA	NA	NA
RLC27192	1.56442	0.00607932	0.875779	0
RLX12152	1.79007	0.00079356	0.149495	0
RLX15981	1.08717	0.0456669	0.999834	0
RLX21916	0.923279	0.00919418	0.999834	0
RLX34804	2.10071	0.00032881	0.0671047	0
DTA00098	0.172353	NA	NA	0
DTH00024	0.750564	NA	NA	0
RLC00975	0.466533	NA	NA	0
RLC27347	0.596136	NA	NA	0
RLG00001	0.873249	NA	NA	0
RLG27789	0.878541	NA	NA	0
RLG29294	0.431485	NA	NA	0
RLG30878	0.422189	NA	NA	0
RLX06968	0.431148	NA	NA	0
RLX14674	0.62073	NA	NA	0
RLX15407	0.42062	NA	NA	0
RLX28384	0.963269	NA	NA	0
RLX30273	0.530757	NA	NA	0
RLG00479	-0.950286	0.103787	0.999834	0
RLG02085	-1.23601	0.0351373	0.999834	0
RLX19877	0.00834489	0.988465	0.999834	0
RLX22399	-0.967073	0.0817546	0.999834	0
RLX24236	-0.785538	0.159312	0.999834	0
RLX28319	-1.23477	0.032818	0.999834	0
DHH00001	0.0201763	0.886991	0.999834	0
DHH00002	0.0315411	0.852978	0.999834	0
DHH00003	0.0855668	0.488728	0.999834	0
DHH00004	0.24768	0.183631	0.999834	0
DHH00005	0.368442	0.283647	0.999834	0
DHH00006	-0.217147	0.404585	0.999834	0
DHH00007	0.0477668	0.834008	0.999834	0
DHH00008	-0.238709	0.193368	0.999834	0
DHH00009	0.17667	0.354256	0.999834	0
DHH00010	-0.0739191	0.736279	0.999834	0
DHH00011	-0.00440377	0.986371	0.999834	0
DHH00012	-0.000660261	0.998543	0.999834	0
DHH00013	-0.200525	0.622056	0.999834	0
DHH00014	0.421267	0.456113	0.999834	0
DHH00015	0.00148292	0.99653	0.999834	0
DHH00016	0.00576475	0.987014	0.999834	0
DHH00017	-0.136316	0.745437	0.999834	0
DHH00018	0.0459202	0.892919	0.999834	0
DHH00019	0.134541	0.628149	0.999834	0
DHH00021	-0.0630669	0.910233	0.999834	0
DHH00023	-0.156184	0.529414	0.999834	0
DHH00024	0.660068	0.24486	0.999834	0
DHH00025	0.293989	0.603053	0.999834	0
DHH00026	0.02032	0.950383	0.999834	0
DHH00029	0.134128	0.61028	0.999834	0
DHH00032	-0.151721	0.53732	0.999834	0
DHH00033	0.228119	0.610421	0.999834	0
DHH00036	0.352996	0.262259	0.999834	0
DHH00038	0.0983196	0.838031	0.999834	0
DHH00039	-0.147088	0.737668	0.999834	0
DHH00040	0.0105023	0.952385	0.999834	0
DHH00042	-1.14303	0.027798	0.999834	0
DHH00045	0.0437248	0.910452	0.999834	0
DHH00048	-0.493598	0.401139	0.999834	0
DHH00049	0.016988	0.974782	0.999834	0
DHH00067	0.00313711	0.995685	0.999834	0
DHH00068	-0.0229124	0.958603	0.999834	0
DHH00071	-0.258564	0.377612	0.999834	0
DHH00081	-0.276742	0.325272	0.999834	0
DHH00082	-0.250442	0.441043	0.999834	0
DHH00085	-0.0607866	0.888532	0.999834	0
DHH00093	-0.834569	NA	NA	0
DHH00096	0.601728	0.258324	0.999834	0
DHH00108	0.109152	0.609794	0.999834	0
DHH00111	0.0906068	0.782785	0.999834	0
DHH00119	0.0949372	0.772618	0.999834	0
DHH00164	0.85875	NA	NA	0
DHH00178	0.207634	0.619258	0.999834	0
DHH00196	0.0413153	0.916203	0.999834	0
DHH00218	0.155618	0.717683	0.999834	0
DHH00222	0.12031	0.718691	0.999834	0
DHH00230	-0.103932	0.805088	0.999834	0
DHH00236	-0.149442	0.789025	0.999834	0
DHH00273	0.131129	0.741356	0.999834	0
DHH00277	0.0240117	0.959661	0.999834	0
DHH00280	-0.485913	0.270994	0.999834	0
DHH00298	-0.219412	0.674835	0.999834	0
DHH00304	-0.0174883	0.942415	0.999834	0
DHH00342	-0.0270421	0.925515	0.999834	0
DHH00344	-0.156502	0.666756	0.999834	0
DHH00349	0.528231	0.213323	0.999834	0
DHH00364	-0.145058	0.683571	0.999834	0
DHH00369	0.291082	0.508645	0.999834	0
DHH00396	-0.013177	0.974961	0.999834	0
DHH00400	0.220496	0.659822	0.999834	0
DHH00433	0.167469	0.66045	0.999834	0
DHH00439	0.388228	0.50843	0.999834	0
DHH00461	0.111961	0.582149	0.999834	0
DHH00483	0.0234612	0.968136	0.999834	0
DHH00498	0.259816	0.52899	0.999834	0
DHH00531	-0.134623	0.536463	0.999834	0
DHH00545	0.095921	0.86051	0.999834	0
DHH00566	0.546484	0.281313	0.999834	0
DHH00571	-0.107672	0.845591	0.999834	0
DHH00579	-0.0513663	0.91136	0.999834	0
DHH00786	0.0462113	0.900166	0.999834	0
DHH00917	-0.0936118	0.568519	0.999834	0
DHH00931	0.102038	0.844768	0.999834	0
DHH00959	-0.183595	0.58589	0.999834	0
DHH00983	-0.725234	0.147217	0.999834	0
DHH00998	-0.119749	0.836044	0.999834	0
DHH01039	0.058135	0.810102	0.999834	0
DHH01041	-0.195481	0.625077	0.999834	0
DHH01066	0.234253	0.689687	0.999834	0
DHH01080	0.55193	0.159149	0.999834	0
DHH01112	0.137192	0.704119	0.999834	0
DHH01195	-0.382904	0.414241	0.999834	0
DHH01264	0.289296	0.362003	0.999834	0
DHH01280	0.189882	0.339219	0.999834	0
DHH01284	-0.603567	0.280912	0.999834	0
DHH01351	-0.147544	0.766373	0.999834	0
DHH01358	-0.177207	0.763018	0.999834	0
DHH01447	0.269946	0.634618	0.999834	0
DHH01478	-0.0320189	0.945811	0.999834	0
DHH01535	0.0531796	0.924218	0.999834	0
DHH01550	-0.143464	0.785709	0.999834	0
DHH01633	0.209606	0.526368	0.999834	0
DHH01639	0.124679	0.665772	0.999834	0
DHH01640	0.296373	0.613771	0.999834	0
DHH01658	1.15662	0.0486959	0.999834	0
DHH01717	0.158059	0.775629	0.999834	0
DHH01883	-0.276619	0.126342	0.999834	0
DHH02074	-0.65653	0.121806	0.999834	0
DHH02108	-0.147001	0.696772	0.999834	0
DHH02122	0.0579826	0.805858	0.999834	0
DHH02154	-0.36171	0.520514	0.999834	0
DHH02213	0.170672	0.558801	0.999834	0
DHH02224	0.596328	0.23759	0.999834	0
DHH02246	0.250242	0.638778	0.999834	0
DHH02291	0.180068	0.724747	0.999834	0
DHH02325	-0.0921278	0.818946	0.999834	0
DHH02361	0.170268	0.551129	0.999834	0
DHH02363	-0.224105	0.411742	0.999834	0
DHH02412	-0.0818798	0.817433	0.999834	0
DHH02419	-0.211989	0.468248	0.999834	0
DHH02434	0.133734	0.584601	0.999834	0
DHH02474	0.326942	0.56625	0.999834	0
DHH02536	0.0754108	0.876388	0.999834	0
DHH02538	-0.33701	0.438208	0.999834	0
DHH02543	0.383181	NA	NA	0
DHH02710	0.294818	0.216468	0.999834	0
DHH02711	-0.185892	0.454299	0.999834	0
DHH02712	-0.222115	0.472806	0.999834	0
DHH02716	0.0265183	0.9333	0.999834	0
DHH02718	-0.252251	0.325871	0.999834	0
DHH02721	0.0494301	0.932921	0.999834	0
DHH02727	-0.400064	0.444931	0.999834	0
DHH02739	-0.220685	0.541521	0.999834	0
DHH02776	0.0013634	0.99815	0.999834	0
DHH02779	-0.306381	0.601887	0.999834	0
DHH02786	0.0529873	0.918629	0.999834	0
DHH02820	0.923914	0.116021	0.999834	0
DHH02841	0.140443	0.773532	0.999834	0
DHH02844	-0.428511	0.421929	0.999834	0
DHH02853	-0.259324	0.605772	0.999834	0
DHH02854	-0.163576	0.777897	0.999834	0
DHH02860	0.0279333	0.95217	0.999834	0
DHH02868	0.373999	0.137534	0.999834	0
DHH02891	-0.541769	0.114098	0.999834	0
DHH02905	-0.349795	0.551854	0.999834	0
DHH02909	-0.0774816	0.861623	0.999834	0
DHH02944	-0.190372	0.687624	0.999834	0
DHH02963	0.173849	0.533372	0.999834	0
DHH02968	0.99435	0.05479	0.999834	0
DHH02971	-0.168355	0.764176	0.999834	0
DHH02973	-0.0341656	0.9063	0.999834	0
DHH02995	-0.294984	0.310433	0.999834	0
DHH02999	0.478254	0.344499	0.999834	0
DHH03018	-0.0324309	0.907231	0.999834	0
DHH03019	-0.458881	0.36273	0.999834	0
DHH03020	0.317055	0.401469	0.999834	0
DHH03033	-0.0845764	0.844275	0.999834	0
DHH03038	-0.383885	0.483916	0.999834	0
DHH03083	0.201276	0.727458	0.999834	0
DHH03089	-0.0348365	0.918148	0.999834	0
DHH03117	0.144109	0.5908	0.999834	0
DHH03127	0.429094	0.393972	0.999834	0
DHH03128	-0.259282	0.239891	0.999834	0
DHH03157	0.0264135	0.956944	0.999834	0
DHH03159	-0.0492347	0.932766	0.999834	0
DHH03164	0.256311	0.65883	0.999834	0
DHH03173	0.0673528	0.899472	0.999834	0
DHH03179	0.32352	0.577502	0.999834	0
DHH03188	0.149223	0.794685	0.999834	0
DHH03221	-0.0266058	0.895528	0.999834	0
DHH03250	-0.169026	0.731259	0.999834	0
DHH03256	0.152074	0.723204	0.999834	0
DHH03286	0.015139	0.958386	0.999834	0
DHH03301	0.1621	0.711362	0.999834	0
DHH03315	0.310704	0.569654	0.999834	0
DHH03320	-0.717942	0.194911	0.999834	0
DHH03324	-0.135712	0.699201	0.999834	0
DHH03380	-0.334577	0.446028	0.999834	0
DHH03387	0.454294	0.335804	0.999834	0
DHH03474	0.0564041	0.883603	0.999834	0
DHH03478	0.0907745	0.827792	0.999834	0
DHH03498	0.0362972	0.90485	0.999834	0
DHH03509	-0.0862669	0.874334	0.999834	0
DHH03510	0.143605	0.586278	0.999834	0
DHH03518	0.0441829	0.876681	0.999834	0
DHH03521	0.113584	0.755813	0.999834	0
DHH03536	0.100732	0.783293	0.999834	0
DHH03546	0.939783	0.0445288	0.999834	0
DHH03548	0.514332	0.380704	0.999834	0
DHH03579	-0.362664	0.338877	0.999834	0
DHH03608	0.298406	0.410385	0.999834	0
DHH03619	0.394777	0.496472	0.999834	0
DHH03621	-0.0379981	0.931674	0.999834	0
DHH03622	0.0202244	0.968422	0.999834	0
DHH03637	0.383679	0.210209	0.999834	0
DHH03651	-0.756244	0.197597	0.999834	0
DHH03664	-0.27148	0.637915	0.999834	0
DHH03729	0.348021	0.518583	0.999834	0
DHH03748	-0.355004	0.535369	0.999834	0
DHH03785	0.110128	0.850914	0.999834	0
DHH03787	-0.28692	0.456901	0.999834	0
DHH03790	0.0662149	0.779276	0.999834	0
DHH03811	-0.0296314	0.919774	0.999834	0
DHH03829	-0.0915005	0.859263	0.999834	0
DHH03831	0.550502	0.215942	0.999834	0
DHH03840	0.134687	0.723444	0.999834	0
DHH03847	0.211168	0.550599	0.999834	0
DHH03851	-0.00731421	0.988129	0.999834	0
DHH03852	-0.879417	0.0870796	0.999834	0
DHH03871	0.302317	0.309369	0.999834	0
DHH03876	-0.142759	0.728736	0.999834	0
DHH03886	0.0238889	0.94442	0.999834	0
DHH03895	-0.781016	0.121967	0.999834	0
DHH03899	-0.0256965	0.961851	0.999834	0
DHH03909	0.0066948	0.979231	0.999834	0
DHH03916	0.902697	0.0257634	0.999834	0
DHH03962	0.00953707	0.986966	0.999834	0
DHH04007	0.117364	0.692012	0.999834	0
DHH04038	-0.197643	0.699218	0.999834	0
DHH04040	0.262518	0.430837	0.999834	0
DHH04042	0.445599	0.346911	0.999834	0
DHH04051	-0.0156254	0.972542	0.999834	0
DHH04093	0.00142964	0.995831	0.999834	0
DHH04133	-0.0846014	0.885528	0.999834	0
DHH04168	0.229451	0.493833	0.999834	0
DHH04172	-0.622532	0.178929	0.999834	0
DHH04179	-0.111968	0.832443	0.999834	0
DHH04198	0.110708	0.850638	0.999834	0
DHH04205	-0.599469	0.12104	0.999834	0
DHH04229	-0.00806126	0.981152	0.999834	0
DHH04240	-0.437081	0.425547	0.999834	0
DHH04247	-0.394755	0.500235	0.999834	0
DHH04248	0.335417	0.524888	0.999834	0
DHH04256	-0.396012	0.375152	0.999834	0
DHH04287	0.0907064	0.685152	0.999834	0
DHH04289	0.115724	0.709957	0.999834	0
DHH04294	0.0722797	0.758283	0.999834	0
DHH04311	0.306437	0.486017	0.999834	0
DHH04327	0.0933412	0.866042	0.999834	0
DHH04351	-0.560421	0.339475	0.999834	0
DHH04368	-0.278299	0.481803	0.999834	0
DHH04387	-0.126728	0.63622	0.999834	0
DHH04398	-0.155922	0.765388	0.999834	0
DHH04412	0.360241	0.498442	0.999834	0
DHH04421	-0.102351	0.77173	0.999834	0
DHH04423	0.0260991	0.925519	0.999834	0
DHH04450	0.152563	0.795251	0.999834	0
DHH04456	0.213847	0.670019	0.999834	0
DHH04457	-0.0266922	0.943185	0.999834	0
DHH04496	0.597948	NA	NA	0
DHH04497	0.119156	0.834948	0.999834	0
DHH04502	0.418436	0.349005	0.999834	0
DHH04530	-0.267873	0.616796	0.999834	0
DHH04571	-0.0419767	0.919689	0.999834	0
DHH04575	0.320991	0.329233	0.999834	0
DHH04613	-0.0730013	0.849714	0.999834	0
DHH04631	-0.0403865	0.943367	0.999834	0
DHH04650	0.189649	0.712397	0.999834	0
DHH04682	0.5973	0.290896	0.999834	0
DHH04685	0.129209	0.797568	0.999834	0
DHH04714	0.200809	0.723318	0.999834	0
DHH04736	0.0714005	0.74631	0.999834	0
DHH04775	-0.0179745	0.97204	0.999834	0
DHH04783	0.505846	0.362529	0.999834	0
DHH04801	0.0773844	0.891077	0.999834	0
DHH04879	0.461221	0.204258	0.999834	0
DHH04907	0.052324	0.899866	0.999834	0
DHH04955	0.79492	0.165263	0.999834	0
DHH04981	0.0554807	0.854032	0.999834	0
DHH04991	0.0542211	0.907076	0.999834	0
DTA00004	0.896225	0.124298	0.999834	0
DTA00005	0.261308	0.651721	0.999834	0
DTA00006	-0.0479171	0.925332	0.999834	0
DTA00009	-0.034852	0.881339	0.999834	0
DTA00023	-0.592064	0.308635	0.999834	0
DTA00025	0.0255499	0.959908	0.999834	0
DTA00030	0.363103	0.489906	0.999834	0
DTA00033	0.0899454	0.757774	0.999834	0
DTA00034	-0.166925	0.776271	0.999834	0
DTA00036	0.528174	0.36518	0.999834	0
DTA00040	-0.826638	0.132541	0.999834	0
DTA00054	-0.13515	0.815721	0.999834	0
DTA00064	-0.035066	0.952434	0.999834	0
DTA00085	0.377948	0.232724	0.999834	0
DTA00106	0.58133	0.322441	0.999834	0
DTA00111	0.415687	0.449959	0.999834	0
DTA00133	0.398931	0.467544	0.999834	0
DTA00135	0.387447	0.469332	0.999834	0
DTA00138	1.14152	0.0460297	0.999834	0
DTA00141	-0.152015	0.67282	0.999834	0
DTA00151	-0.234724	0.435566	0.999834	0
DTA00153	-0.0273931	0.95425	0.999834	0
DTA00155	-0.590212	0.31004	0.999834	0
DTA00164	-0.118409	0.81668	0.999834	0
DTA00169	0.373211	0.378958	0.999834	0
DTA00171	0.273694	0.638171	0.999834	0
DTA00179	0.467241	0.418855	0.999834	0
DTA00202	0.245092	0.539004	0.999834	0
DTA00217	-0.556139	0.214718	0.999834	0
DTA00224	-0.332049	0.541763	0.999834	0
DTA00231	-0.174735	0.713802	0.999834	0
DTA00234	-0.276183	0.538699	0.999834	0
DTA00248	0.893325	0.119569	0.999834	0
DTA00256	0.785715	0.103335	0.999834	0
DTA00263	0.363048	0.521567	0.999834	0
DTA00269	-0.105739	0.719291	0.999834	0
DTA00270	-0.0201089	0.971313	0.999834	0
DTA00283	0.14213	0.780322	0.999834	0
DTA00300	0.133263	0.798723	0.999834	0
DTA00312	0.0434632	0.937173	0.999834	0
DTA00322	-0.0580649	0.896218	0.999834	0
DTA00359	-0.943351	0.0738567	0.999834	0
DTA00365	-0.0937213	0.866723	0.999834	0
DTA13185	-0.146488	0.742875	0.999834	0
DTC00030	0.14583	0.719153	0.999834	0
DTC00037	0.157142	0.78734	0.999834	0
DTC00045	-0.348807	0.54971	0.999834	0
DTC00060	0.112116	0.801554	0.999834	0
DTC00062	0.255824	0.633994	0.999834	0
DTC00063	-0.04864	0.89782	0.999834	0
DTC00088	0.00907488	0.986419	0.999834	0
DTC00108	-0.0174922	0.975637	0.999834	0
DTC00113	0.25334	0.65557	0.999834	0
DTH00013	0.0542022	0.910282	0.999834	0
DTH00023	-0.795385	0.172401	0.999834	0
DTH00032	1.36521	0.019687	0.999834	0
DTH00035	0.884864	0.113385	0.999834	0
DTH00051	-0.285807	0.491523	0.999834	0
DTH00058	0.371202	0.460992	0.999834	0
DTH00073	-0.534059	0.307556	0.999834	0
DTH00102	-0.427515	0.189839	0.999834	0
DTH00160	0.28442	0.396111	0.999834	0
DTH00194	-0.430008	0.400683	0.999834	0
DTH00206	0.0645293	0.889314	0.999834	0
DTH00327	0.200768	0.732686	0.999834	0
DTH00410	0.173316	0.609105	0.999834	0
DTH00434	-0.25056	0.506636	0.999834	0
DTH00437	0.00185625	0.99528	0.999834	0
DTH10328	-0.215444	0.711701	0.999834	0
DTH11374	0.181136	0.757738	0.999834	0
DTH11674	0.824749	0.085817	0.999834	0
DTH11714	0.0969588	0.720477	0.999834	0
DTH11798	0.0483867	0.870085	0.999834	0
DTH12617	0.0251282	0.958155	0.999834	0
DTH12996	0.314352	0.589447	0.999834	0
DTH16232	-0.434387	0.446196	0.999834	0
DTM00257	0.0633181	0.877069	0.999834	0
DTM00268	0.101958	0.78821	0.999834	0
DTM00299	-0.616123	0.201784	0.999834	0
DTM00473	0.622287	0.240584	0.999834	0
DTM00743	0.053099	0.876873	0.999834	0
DTM00884	-0.106848	0.853889	0.999834	0
DTM01468	-0.386738	0.510238	0.999834	0
DTM03723	-0.0530501	0.917684	0.999834	0
DTM06094	0.768563	0.119897	0.999834	0
DTM06136	-0.478212	0.335306	0.999834	0
DTM08014	0.143358	0.741896	0.999834	0
DTM08178	-0.730628	0.212551	0.999834	0
DTM08959	0.7301	0.214083	0.999834	0
DTM10163	-1.02259	0.0503639	0.999834	0
DTM10271	-0.145681	0.803605	0.999834	0
DTM14108	0.00263267	0.996347	0.999834	0
DTM17242	0.0679287	0.905029	0.999834	0
DTM19831	0.684368	0.209981	0.999834	0
DTM25163	0.473042	0.253929	0.999834	0
DTM25996	0.0204156	0.970066	0.999834	0
DTT00025	1.2189	0.0289451	0.999834	0
DTT11073	-0.319478	0.321832	0.999834	0
DTT13262	0.609492	0.243633	0.999834	0
RIL00005	0.743776	0.179873	0.999834	0
RIL00007	0.162674	0.673852	0.999834	0
RIT00002	0.105646	0.856871	0.999834	0
RLC00002	0.0395127	0.755143	0.999834	0
RLC00004	-0.0435777	0.89245	0.999834	0
RLC00013	0.0607452	0.814076	0.999834	0
RLC00014	0.387795	0.281119	0.999834	0
RLC00015	-0.114316	0.751062	0.999834	0
RLC00016	0.0476787	0.753949	0.999834	0
RLC00019	0.305299	0.208871	0.999834	0
RLC00022	-0.074911	0.826228	0.999834	0
RLC00023	0.0417466	0.940409	0.999834	0
RLC00025	0.0502522	0.866088	0.999834	0
RLC00026	-0.167494	0.629346	0.999834	0
RLC00029	-0.0340084	0.922109	0.999834	0
RLC00030	0.152359	0.630501	0.999834	0
RLC00032	0.0684252	0.787825	0.999834	0
RLC00033	-0.139238	0.797678	0.999834	0
RLC00034	-0.439284	0.279254	0.999834	0
RLC00041	0.19373	0.661258	0.999834	0
RLC00042	-0.140144	0.550318	0.999834	0
RLC00044	0.310226	0.514021	0.999834	0
RLC00045	0.174863	0.569697	0.999834	0
RLC00046	0.0611245	0.705977	0.999834	0
RLC00048	-0.261709	0.629311	0.999834	0
RLC00049	-0.129472	0.546816	0.999834	0
RLC00050	-0.469612	0.369182	0.999834	0
RLC00052	0.143928	0.534982	0.999834	0
RLC00054	0.0186379	0.947613	0.999834	0
RLC00057	-0.0499307	0.901945	0.999834	0
RLC00059	-0.274865	0.636112	0.999834	0
RLC00062	0.114091	0.740083	0.999834	0
RLC00063	-0.0102914	0.975689	0.999834	0
RLC00064	0.2597	0.430091	0.999834	0
RLC00067	0.0989686	0.858267	0.999834	0
RLC00068	0.0931249	0.820054	0.999834	0
RLC00069	0.729002	0.0232082	0.999834	0
RLC00070	-0.126552	0.80653	0.999834	0
RLC00074	0.0166427	0.973542	0.999834	0
RLC00075	-0.02531	0.947709	0.999834	0
RLC00076	-0.673225	0.093819	0.999834	0
RLC00079	-0.0464359	0.93406	0.999834	0
RLC00083	0.155741	0.57077	0.999834	0
RLC00096	0.0499199	0.846121	0.999834	0
RLC00099	0.069862	0.869625	0.999834	0
RLC00101	0.37706	0.337393	0.999834	0
RLC00112	0.0325402	0.949835	0.999834	0
RLC00117	0.0077282	0.974878	0.999834	0
RLC00124	0.26795	0.41682	0.999834	0
RLC00127	0.434872	0.324444	0.999834	0
RLC00135	1.28029	0.0235473	0.999834	0
RLC00143	-0.180533	0.758098	0.999834	0
RLC00145	0.283103	0.346808	0.999834	0
RLC00148	-0.164295	0.425002	0.999834	0
RLC00151	-0.25708	0.640848	0.999834	0
RLC00153	0.222993	0.485511	0.999834	0
RLC00157	-0.0426502	0.939202	0.999834	0
RLC00158	0.554616	0.201874	0.999834	0
RLC00163	-0.509522	0.316084	0.999834	0
RLC00165	-0.0544649	0.923606	0.999834	0
RLC00169	0.129759	0.792853	0.999834	0
RLC00176	-0.190647	0.733833	0.999834	0
RLC00179	-0.000869549	0.997198	0.999834	0
RLC00182	0.129966	0.754131	0.999834	0
RLC00184	0.237226	0.60224	0.999834	0
RLC00189	-0.00578092	0.99207	0.999834	0
RLC00190	-0.423871	0.340357	0.999834	0
RLC00206	-0.268602	0.118992	0.999834	0
RLC00207	-0.0673999	0.832644	0.999834	0
RLC00217	-0.198272	0.671855	0.999834	0
RLC00224	-0.459325	0.430561	0.999834	0
RLC00232	0.19126	0.737686	0.999834	0
RLC00233	-0.102045	0.853504	0.999834	0
RLC00248	0.192631	0.736149	0.999834	0
RLC00250	-0.29862	0.588161	0.999834	0
RLC00252	0.0819064	0.882698	0.999834	0
RLC00258	0.393241	0.384087	0.999834	0
RLC00274	-0.287213	0.604951	0.999834	0
RLC00278	0.221556	0.690108	0.999834	0
RLC00280	0.665641	0.164503	0.999834	0
RLC00282	0.190817	0.524059	0.999834	0
RLC00305	-0.680952	0.212734	0.999834	0
RLC00313	0.618469	0.251406	0.999834	0
RLC00316	0.052438	0.916352	0.999834	0
RLC00318	-0.587029	0.203335	0.999834	0
RLC00336	0.0286741	0.960453	0.999834	0
RLC00340	-0.831573	NA	NA	0
RLC00351	0.520751	NA	NA	0
RLC00364	-0.33592	0.550468	0.999834	0
RLC00367	-0.130242	0.662364	0.999834	0
RLC00375	0.488306	0.403463	0.999834	0
RLC00391	0.191375	0.57282	0.999834	0
RLC00414	-0.0205225	0.963049	0.999834	0
RLC00416	0.429042	NA	NA	0
RLC00423	0.0922217	0.838208	0.999834	0
RLC00429	0.115225	0.764879	0.999834	0
RLC00462	0.432649	0.175641	0.999834	0
RLC00463	0.217214	0.65913	0.999834	0
RLC00473	0.0264463	0.943788	0.999834	0
RLC00474	0.0407161	0.94175	0.999834	0
RLC00475	0.630988	0.0907291	0.999834	0
RLC00480	0.0504665	0.930157	0.999834	0
RLC00496	-0.167114	0.774288	0.999834	0
RLC00500	-0.711015	0.0860173	0.999834	0
RLC00574	-0.15226	0.791846	0.999834	0
RLC00576	0.058881	0.897625	0.999834	0
RLC00589	-0.225743	0.673685	0.999834	0
RLC00621	-0.04885	0.933712	0.999834	0
RLC00664	-0.181722	0.655752	0.999834	0
RLC00691	-0.0139153	0.979742	0.999834	0
RLC00694	-1.23041	0.0330293	0.999834	0
RLC00699	0.301524	0.37605	0.999834	0
RLC00703	-0.24698	0.665953	0.999834	0
RLC00729	0.0654998	0.90942	0.999834	0
RLC00751	0.165852	0.777866	0.999834	0
RLC00753	0.221206	0.558504	0.999834	0
RLC00764	0.465805	0.328279	0.999834	0
RLC00771	-0.737249	0.0763981	0.999834	0
RLC00844	-0.258361	0.505999	0.999834	0
RLC00845	0.247488	0.665375	0.999834	0
RLC00869	0.216842	0.692896	0.999834	0
RLC00939	-0.134357	0.728918	0.999834	0
RLC00940	0.156771	0.788987	0.999834	0
RLC00950	0.0544795	0.909132	0.999834	0
RLC01035	0.382449	0.216825	0.999834	0
RLC01054	-0.121079	0.836733	0.999834	0
RLC01102	-0.295519	0.594986	0.999834	0
RLC01129	-0.0955595	0.864052	0.999834	0
RLC01204	-0.303572	0.603994	0.999834	0
RLC01251	-0.0665194	0.886518	0.999834	0
RLC01269	-0.560381	0.216328	0.999834	0
RLC01320	0.0569924	0.901343	0.999834	0
RLC01332	0.289287	0.589304	0.999834	0
RLC01350	0.350156	0.468368	0.999834	0
RLC01373	0.0770101	0.89573	0.999834	0
RLC01387	0.131311	0.794776	0.999834	0
RLC01401	0.0913543	0.876508	0.999834	0
RLC01418	0.760099	0.129774	0.999834	0
RLC01430	-0.563624	0.320501	0.999834	0
RLC01448	0.21496	0.714113	0.999834	0
RLC01507	-0.656979	0.25346	0.999834	0
RLC01567	-0.101392	0.863077	0.999834	0
RLC01635	0.127881	0.809491	0.999834	0
RLC01737	0.127326	0.823595	0.999834	0
RLC01787	-0.328121	0.575164	0.999834	0
RLC01864	-1.04202	0.0200432	0.999834	0
RLC01866	0.166414	0.734188	0.999834	0
RLC01899	0.0574058	0.916899	0.999834	0
RLC01923	0.212636	0.684354	0.999834	0
RLC01954	-0.106202	0.856241	0.999834	0
RLC01986	0.089695	0.852704	0.999834	0
RLC02070	0.7394	0.149354	0.999834	0
RLC02080	0.0201512	0.970447	0.999834	0
RLC02099	0.699852	0.204686	0.999834	0
RLC02124	0.0243008	0.960519	0.999834	0
RLC02192	0.149016	0.782966	0.999834	0
RLC02249	0.0731801	0.895867	0.999834	0
RLC02319	-0.439106	0.390991	0.999834	0
RLC02327	0.387523	0.289414	0.999834	0
RLC02432	0.32101	0.465122	0.999834	0
RLC02521	0.150907	0.620219	0.999834	0
RLC02532	-0.317373	0.484968	0.999834	0
RLC02592	-0.471853	0.411286	0.999834	0
RLC02604	0.183144	0.588748	0.999834	0
RLC02679	0.2571	0.54655	0.999834	0
RLC02818	-0.0682032	0.907309	0.999834	0
RLC02869	-0.0308109	0.957274	0.999834	0
RLC02931	0.052699	0.904842	0.999834	0
RLC02959	0.664894	NA	NA	0
RLC03056	0.0894912	0.872467	0.999834	0
RLC03202	0.291579	0.593943	0.999834	0
RLC03282	0.416222	0.451203	0.999834	0
RLC03470	0.913277	0.107663	0.999834	0
RLC03576	0.527086	0.36527	0.999834	0
RLC03589	-0.0795137	0.890367	0.999834	0
RLC03606	-0.305579	0.344757	0.999834	0
RLC03696	-0.33761	0.558227	0.999834	0
RLC04176	0.176569	0.749869	0.999834	0
RLC04195	0.0999792	0.833395	0.999834	0
RLC04203	1.30894	0.0245773	0.999834	0
RLC04445	0.183436	0.72221	0.999834	0
RLC04469	-0.0737328	0.887511	0.999834	0
RLC04470	-0.231753	0.656994	0.999834	0
RLC04687	0.30807	0.554503	0.999834	0
RLC04710	0.0865879	0.865902	0.999834	0
RLC05073	0.481887	NA	NA	0
RLC05117	0.0884223	0.825946	0.999834	0
RLC05190	0.178987	0.746344	0.999834	0
RLC05649	0.285877	0.546096	0.999834	0
RLC05811	0.292251	0.609525	0.999834	0
RLC06058	0.465604	0.422969	0.999834	0
RLC06095	0.567025	0.334517	0.999834	0
RLC07254	-0.570018	0.21633	0.999834	0
RLC07642	-0.754978	0.187119	0.999834	0
RLC07712	-0.100303	0.864087	0.999834	0
RLC08157	-0.198068	0.59134	0.999834	0
RLC08419	0.25411	0.63119	0.999834	0
RLC08832	0.04464	0.907757	0.999834	0
RLC09440	-0.00317946	0.994487	0.999834	0
RLC09991	0.139951	0.788791	0.999834	0
RLC11745	0.0187031	0.973602	0.999834	0
RLC11790	-0.282414	0.602392	0.999834	0
RLC13018	-0.336413	0.445468	0.999834	0
RLC13934	0.255553	0.62973	0.999834	0
RLC14024	0.39494	0.426039	0.999834	0
RLC15409	-0.493691	0.401065	0.999834	0
RLC15909	0.157285	0.782939	0.999834	0
RLC16719	0.184086	0.741343	0.999834	0
RLC16993	0.0832297	0.659217	0.999834	0
RLC16999	-0.0181162	0.975366	0.999834	0
RLC17098	-0.616338	0.272229	0.999834	0
RLC17281	-0.0816587	0.88217	0.999834	0
RLC17493	-0.028546	0.95837	0.999834	0
RLC17496	-0.864397	0.121833	0.999834	0
RLC17575	0.374256	0.212411	0.999834	0
RLC17717	0.161121	0.783555	0.999834	0
RLC18167	0.0738547	0.900033	0.999834	0
RLC18297	0.102514	0.861208	0.999834	0
RLC19111	-0.312392	0.594986	0.999834	0
RLC19134	-0.48941	0.391517	0.999834	0
RLC19365	-0.00443736	0.993721	0.999834	0
RLC19486	-0.115404	0.819105	0.999834	0
RLC19642	-0.490917	0.401961	0.999834	0
RLC20149	-0.148586	0.800473	0.999834	0
RLC20793	-0.0409983	0.942753	0.999834	0
RLC21280	0.150739	0.776932	0.999834	0
RLC21372	-0.476046	0.418088	0.999834	0
RLC21552	-0.23076	0.482223	0.999834	0
RLC21638	-0.0372627	0.949233	0.999834	0
RLC22195	0.0607964	0.911014	0.999834	0
RLC22419	0.0470832	0.913264	0.999834	0
RLC22459	-0.235096	0.674409	0.999834	0
RLC23860	-0.533193	0.239564	0.999834	0
RLC25030	-0.657712	0.222584	0.999834	0
RLC25031	0.102149	0.596066	0.999834	0
RLC25034	-0.0736376	0.779683	0.999834	0
RLC25040	-0.491138	0.288794	0.999834	0
RLC25043	-0.0422241	0.923363	0.999834	0
RLC25046	0.625279	NA	NA	0
RLC25061	-0.130918	0.812465	0.999834	0
RLC25063	0.138483	0.753708	0.999834	0
RLC25070	-0.886114	0.0901147	0.999834	0
RLC25085	-0.349385	0.552317	0.999834	0
RLC25095	-0.818465	0.0905448	0.999834	0
RLC25098	0.229404	0.244557	0.999834	0
RLC25151	0.338223	0.565085	0.999834	0
RLC25256	0.0766124	0.893715	0.999834	0
RLC25388	-0.0922595	0.777923	0.999834	0
RLC25449	0.618778	0.105325	0.999834	0
RLC25470	0.205045	0.726805	0.999834	0
RLC25488	0.181641	0.716323	0.999834	0
RLC25641	0.166087	0.753859	0.999834	0
RLC25768	-0.0546405	0.925806	0.999834	0
RLC25920	-0.386634	0.427975	0.999834	0
RLC25965	0.316175	NA	NA	0
RLC25979	0.422078	0.401291	0.999834	0
RLC26127	-0.180435	0.637636	0.999834	0
RLC26413	0.415812	0.419579	0.999834	0
RLC26420	0.00639223	0.988455	0.999834	0
RLC26590	-0.460515	0.373211	0.999834	0
RLC26593	-0.436855	0.333411	0.999834	0
RLC26735	-0.0333086	0.94577	0.999834	0
RLC26879	0.404336	0.488903	0.999834	0
RLC27012	-0.260484	0.509033	0.999834	0
RLC27058	-0.0681272	0.887243	0.999834	0
RLC27254	-0.122902	0.802379	0.999834	0
RLC27262	0.0213573	0.97062	0.999834	0
RLC27505	0.0749499	NA	NA	0
RLC27563	0.0907824	0.818288	0.999834	0
RLC27803	-0.618961	0.184253	0.999834	0
RLC27918	0.0845203	0.79891	0.999834	0
RLC27942	0.0810733	0.889453	0.999834	0
RLC27949	0.144452	0.76072	0.999834	0
RLC27965	-0.0942506	0.777385	0.999834	0
RLC28017	0.134286	0.817981	0.999834	0
RLC28086	0.592424	0.30211	0.999834	0
RLC28238	0.160213	0.772073	0.999834	0
RLC29133	-0.199357	0.651456	0.999834	0
RLC29169	0.0679163	0.90802	0.999834	0
RLC29265	0.443326	0.318659	0.999834	0
RLC29297	0.4337	0.289144	0.999834	0
RLC29336	0.131693	0.817193	0.999834	0
RLC29661	-0.13251	0.790358	0.999834	0
RLC30074	-0.209879	0.693917	0.999834	0
RLC30124	0.355101	0.463451	0.999834	0
RLC30332	0.409543	0.365125	0.999834	0
RLC30336	0.0488746	0.866358	0.999834	0
RLC30380	-0.828702	0.144104	0.999834	0
RLC31341	0.458404	0.286593	0.999834	0
RLC32256	-0.00102147	0.998609	0.999834	0
RLC34683	0.0937574	0.854463	0.999834	0
RLC34936	-0.867775	0.130468	0.999834	0
RLC35160	-0.730281	0.214073	0.999834	0
RLC35455	0.0598335	0.90394	0.999834	0
RLC35927	-0.0895551	0.878922	0.999834	0
RLG00003	0.0914514	0.547235	0.999834	0
RLG00005	0.0524331	0.80128	0.999834	0
RLG00006	0.195352	0.615917	0.999834	0
RLG00007	0.106431	0.775301	0.999834	0
RLG00008	0.211324	0.508344	0.999834	0
RLG00009	0.3215	0.420316	0.999834	0
RLG00010	0.0359554	0.89444	0.999834	0
RLG00011	-0.113267	0.713503	0.999834	0
RLG00012	0.261817	0.427145	0.999834	0
RLG00017	0.0559875	0.873765	0.999834	0
RLG00018	-0.237041	0.593718	0.999834	0
RLG00020	-0.0030397	0.995759	0.999834	0
RLG00021	0.713743	NA	NA	0
RLG00024	-0.130664	0.526691	0.999834	0
RLG00027	0.137353	0.783439	0.999834	0
RLG00028	0.320001	0.256011	0.999834	0
RLG00031	0.98095	0.0121477	0.999834	0
RLG00035	0.291215	0.48565	0.999834	0
RLG00036	0.00897296	0.986798	0.999834	0
RLG00037	-0.270128	0.399677	0.999834	0
RLG00038	-0.394527	0.447119	0.999834	0
RLG00039	-0.127518	0.583888	0.999834	0
RLG00040	0.221574	0.637812	0.999834	0
RLG00043	0.602599	0.196794	0.999834	0
RLG00047	-0.341911	0.120261	0.999834	0
RLG00051	-0.365783	0.303981	0.999834	0
RLG00053	-0.138215	0.738965	0.999834	0
RLG00055	-0.11337	0.582737	0.999834	0
RLG00056	0.209938	0.426009	0.999834	0
RLG00058	-0.209448	0.555065	0.999834	0
RLG00060	-0.0540129	0.908342	0.999834	0
RLG00071	-0.175659	0.753539	0.999834	0
RLG00072	0.168139	0.749392	0.999834	0
RLG00073	0.0995698	0.547518	0.999834	0
RLG00077	0.0145097	0.980088	0.999834	0
RLG00078	-0.14506	0.786973	0.999834	0
RLG00081	0.407603	0.452211	0.999834	0
RLG00082	0.137792	0.773128	0.999834	0
RLG00085	-0.259998	0.356907	0.999834	0
RLG00089	-0.083018	0.887015	0.999834	0
RLG00090	0.234281	0.67449	0.999834	0
RLG00091	-0.0684553	0.905451	0.999834	0
RLG00098	-0.577335	0.28688	0.999834	0
RLG00103	-0.391064	0.505845	0.999834	0
RLG00107	0.303201	0.475086	0.999834	0
RLG00110	0.309516	0.567445	0.999834	0
RLG00111	-0.232216	0.692839	0.999834	0
RLG00114	0.0880956	0.880237	0.999834	0
RLG00120	0.111876	0.709702	0.999834	0
RLG00121	-0.15504	0.781397	0.999834	0
RLG00122	0.148759	0.799198	0.999834	0
RLG00123	0.172521	0.668036	0.999834	0
RLG00129	-0.245263	0.6547	0.999834	0
RLG00130	-0.0141807	0.970638	0.999834	0
RLG00140	0.180301	0.755954	0.999834	0
RLG00155	0.0925508	0.874423	0.999834	0
RLG00159	-0.00143361	0.996955	0.999834	0
RLG00160	-0.315626	0.391148	0.999834	0
RLG00166	0.145362	0.802895	0.999834	0
RLG00167	-0.362958	0.448399	0.999834	0
RLG00174	-0.0818024	0.871155	0.999834	0
RLG00175	0.268744	0.610733	0.999834	0
RLG00180	-0.168257	0.774492	0.999834	0
RLG00181	-0.300353	0.60863	0.999834	0
RLG00185	0.756539	0.110666	0.999834	0
RLG00186	-0.160899	0.772115	0.999834	0
RLG00187	-0.679303	0.234255	0.999834	0
RLG00191	0.90025	NA	NA	0
RLG00192	0.0193576	0.97371	0.999834	0
RLG00194	-0.0384942	0.941832	0.999834	0
RLG00202	-0.255212	0.639574	0.999834	0
RLG00204	-0.345082	0.5506	0.999834	0
RLG00211	0.05482	0.746816	0.999834	0
RLG00212	0.696277	0.164343	0.999834	0
RLG00221	-0.0548689	0.907826	0.999834	0
RLG00222	0.142818	0.726743	0.999834	0
RLG00223	0.434274	0.443642	0.999834	0
RLG00225	0.528304	0.243458	0.999834	0
RLG00226	-0.0967123	0.838479	0.999834	0
RLG00227	-0.0455641	0.932919	0.999834	0
RLG00235	0.202839	0.668027	0.999834	0
RLG00237	-0.0552115	0.892749	0.999834	0
RLG00240	-0.183054	0.750522	0.999834	0
RLG00241	-0.150224	0.784091	0.999834	0
RLG00253	0.28469	0.621442	0.999834	0
RLG00261	1.4351	0.0146468	0.999834	0
RLG00268	-0.204765	0.544835	0.999834	0
RLG00271	-0.360992	0.53456	0.999834	0
RLG00272	-0.185848	0.694858	0.999834	0
RLG00283	0.257067	0.655315	0.999834	0
RLG00287	0.110675	0.761439	0.999834	0
RLG00288	0.215187	0.703757	0.999834	0
RLG00290	0.26265	0.539826	0.999834	0
RLG00292	-0.102735	0.799641	0.999834	0
RLG00300	-0.108456	0.444728	0.999834	0
RLG00306	-0.0141807	0.970638	0.999834	0
RLG00310	0.205161	0.681057	0.999834	0
RLG00320	0.0872686	0.858835	0.999834	0
RLG00322	-0.0873142	0.880251	0.999834	0
RLG00323	0.13584	0.817265	0.999834	0
RLG00330	0.0308241	0.915705	0.999834	0
RLG00331	-0.123768	0.833214	0.999834	0
RLG00332	0.428625	0.339542	0.999834	0
RLG00333	0.883895	0.132548	0.999834	0
RLG00337	-0.441671	0.322145	0.999834	0
RLG00339	0.0886499	0.87448	0.999834	0
RLG00350	0.0832614	0.870775	0.999834	0
RLG00357	0.221934	0.598095	0.999834	0
RLG00361	0.689543	NA	NA	0
RLG00363	0.189759	0.746843	0.999834	0
RLG00374	0.292812	0.574197	0.999834	0
RLG00379	-0.270477	0.426575	0.999834	0
RLG00400	-0.0798856	0.878158	0.999834	0
RLG00405	-0.384584	0.511991	0.999834	0
RLG00406	0.0950204	0.867212	0.999834	0
RLG00415	1.33281	0.00820229	0.999834	0
RLG00417	0.190095	0.737528	0.999834	0
RLG00435	0.122207	0.834731	0.999834	0
RLG00436	0.0508938	0.916429	0.999834	0
RLG00452	-0.322988	0.547523	0.999834	0
RLG00459	0.38975	0.247784	0.999834	0
RLG00466	0.245369	0.437798	0.999834	0
RLG00470	0.115225	0.764879	0.999834	0
RLG00478	-0.260196	0.633637	0.999834	0
RLG00486	-0.0994375	0.660643	0.999834	0
RLG00527	-0.44792	0.182818	0.999834	0
RLG00541	-0.106839	0.854859	0.999834	0
RLG00546	0.158383	0.769187	0.999834	0
RLG00559	0.260917	0.637094	0.999834	0
RLG00570	0.201503	0.572017	0.999834	0
RLG00598	-0.143586	0.709375	0.999834	0
RLG00613	-0.450428	0.430867	0.999834	0
RLG00616	0.0287925	0.960832	0.999834	0
RLG00620	0.163335	0.627162	0.999834	0
RLG00626	-0.181008	0.655826	0.999834	0
RLG00636	0.114707	0.844321	0.999834	0
RLG00639	-0.0525979	0.918745	0.999834	0
RLG00642	-0.231119	0.672455	0.999834	0
RLG00644	-0.133044	0.664263	0.999834	0
RLG00656	0.032855	0.943166	0.999834	0
RLG00667	0.135198	0.759388	0.999834	0
RLG00675	-0.0632109	0.913563	0.999834	0
RLG00679	-0.546597	0.326101	0.999834	0
RLG00680	0.419407	0.470717	0.999834	0
RLG00690	0.00751459	0.977054	0.999834	0
RLG00695	-0.460151	0.170733	0.999834	0
RLG00709	-0.176506	0.654108	0.999834	0
RLG00716	1.18875	0.0322021	0.999834	0
RLG00722	0.284062	0.613604	0.999834	0
RLG00727	-0.298236	0.608742	0.999834	0
RLG00736	-0.360325	0.53115	0.999834	0
RLG00750	-0.196657	0.714877	0.999834	0
RLG00757	0.441291	0.446874	0.999834	0
RLG00768	0.0992573	0.82591	0.999834	0
RLG00772	-0.162667	0.778406	0.999834	0
RLG00802	0.258936	0.626665	0.999834	0
RLG00863	-0.181427	0.740753	0.999834	0
RLG00871	0.371208	0.524335	0.999834	0
RLG00877	0.0308315	0.952057	0.999834	0
RLG00879	-0.0664967	0.850511	0.999834	0
RLG00902	-0.25341	0.645692	0.999834	0
RLG00911	0.152729	0.679556	0.999834	0
RLG00925	-0.0463354	0.93668	0.999834	0
RLG00956	0.258458	0.444608	0.999834	0
RLG00993	0.363424	0.315529	0.999834	0
RLG00995	0.138171	0.768119	0.999834	0
RLG01012	-0.0555656	0.922686	0.999834	0
RLG01049	-0.0291728	0.960312	0.999834	0
RLG01052	0.341994	0.551485	0.999834	0
RLG01077	-0.138905	0.812437	0.999834	0
RLG01105	0.411194	0.483235	0.999834	0
RLG01132	-0.0433618	0.939332	0.999834	0
RLG01136	0.116815	0.812597	0.999834	0
RLG01137	0.494093	0.126648	0.999834	0
RLG01144	-0.549242	0.294085	0.999834	0
RLG01150	0.0468548	0.901763	0.999834	0
RLG01168	0.232508	0.630228	0.999834	0
RLG01175	-0.659625	NA	NA	0
RLG01182	0.2543	0.40673	0.999834	0
RLG01224	-0.0371152	0.933449	0.999834	0
RLG01234	-0.247242	0.445954	0.999834	0
RLG01246	-0.0988976	0.85087	0.999834	0
RLG01277	0.52644	0.251421	0.999834	0
RLG01353	0.0749858	0.898013	0.999834	0
RLG01356	0.0677753	0.901987	0.999834	0
RLG01415	0.121827	0.835841	0.999834	0
RLG01421	-0.0775456	0.77726	0.999834	0
RLG01431	-0.436051	0.441696	0.999834	0
RLG01469	-0.158667	0.774922	0.999834	0
RLG01490	-0.205445	0.72438	0.999834	0
RLG01495	0.465344	0.318296	0.999834	0
RLG01547	0.386258	0.453384	0.999834	0
RLG01570	-0.0334257	0.953439	0.999834	0
RLG01609	-0.254891	0.642334	0.999834	0
RLG01657	-0.0778946	0.891843	0.999834	0
RLG01676	-0.195963	0.732665	0.999834	0
RLG01706	0.679093	0.214632	0.999834	0
RLG01739	-0.548182	0.333784	0.999834	0
RLG01762	-0.152107	0.79511	0.999834	0
RLG01763	-0.323831	0.54204	0.999834	0
RLG01820	0.338234	0.363821	0.999834	0
RLG01835	0.0248293	0.964825	0.999834	0
RLG01862	0.0742299	0.899478	0.999834	0
RLG01885	-0.232873	0.679366	0.999834	0
RLG01891	0.203191	0.380919	0.999834	0
RLG01950	0.0564041	0.883603	0.999834	0
RLG01957	0.0674054	0.908499	0.999834	0
RLG01967	0.700736	0.228666	0.999834	0
RLG02001	-0.479847	0.349649	0.999834	0
RLG02005	0.291292	0.360856	0.999834	0
RLG02015	0.0075044	0.985108	0.999834	0
RLG02034	-0.549975	0.34356	0.999834	0
RLG02036	-0.805492	0.163338	0.999834	0
RLG02065	-0.00691825	0.986272	0.999834	0
RLG02097	0.229963	0.695687	0.999834	0
RLG02103	0.0451952	0.922909	0.999834	0
RLG02123	1.65517	0.0047069	0.76848	0
RLG02149	-0.230199	0.550324	0.999834	0
RLG02177	0.313758	0.449741	0.999834	0
RLG02194	-0.127775	0.816373	0.999834	0
RLG02205	0.114187	0.81011	0.999834	0
RLG02215	-0.324146	0.147418	0.999834	0
RLG02224	0.0703894	0.881606	0.999834	0
RLG02225	-0.0818127	0.878911	0.999834	0
RLG02236	0.0570197	0.92171	0.999834	0
RLG02315	0.0272325	0.958057	0.999834	0
RLG02365	-0.190076	0.744804	0.999834	0
RLG02368	0.221709	0.630444	0.999834	0
RLG02389	-0.257582	0.661205	0.999834	0
RLG02427	0.0633344	0.897815	0.999834	0
RLG02451	-0.0370968	0.922203	0.999834	0
RLG02490	0.14698	0.779644	0.999834	0
RLG02495	0.265104	0.651376	0.999834	0
RLG02547	0.0642254	0.872975	0.999834	0
RLG02552	0.199978	0.72681	0.999834	0
RLG02568	-0.393697	0.501352	0.999834	0
RLG02748	0.0657138	0.888109	0.999834	0
RLG02749	0.0348471	0.95047	0.999834	0
RLG02751	0.308662	0.422881	0.999834	0
RLG02784	-0.0523599	0.926997	0.999834	0
RLG02808	-0.221617	0.706127	0.999834	0
RLG02819	0.309911	0.552066	0.999834	0
RLG02848	-0.177268	0.704339	0.999834	0
RLG02906	-0.164061	0.762508	0.999834	0
RLG02915	-0.135263	0.817481	0.999834	0
RLG02949	0.089973	0.8615	0.999834	0
RLG02958	0.169386	0.773242	0.999834	0
RLG02966	0.240255	0.679128	0.999834	0
RLG02979	0.102433	0.84829	0.999834	0
RLG03009	-0.768981	NA	NA	0
RLG03015	0.385372	0.441989	0.999834	0
RLG03049	-0.41738	0.418885	0.999834	0
RLG03059	0.0314578	0.957307	0.999834	0
RLG03171	-0.0394168	0.942104	0.999834	0
RLG03197	0.466529	0.425674	0.999834	0
RLG03237	-0.0812647	0.797304	0.999834	0
RLG03267	-0.0690918	0.875809	0.999834	0
RLG03292	-0.144668	0.788996	0.999834	0
RLG03545	-0.428922	0.365612	0.999834	0
RLG03608	0.497909	0.381767	0.999834	0
RLG03637	0.063359	0.909192	0.999834	0
RLG03677	-0.06229	0.89709	0.999834	0
RLG03678	-0.000987252	0.996969	0.999834	0
RLG03698	0.0400848	0.931987	0.999834	0
RLG03699	0.709147	0.064697	0.999834	0
RLG03723	0.0566249	0.91526	0.999834	0
RLG03809	-0.051513	0.9275	0.999834	0
RLG03877	-0.340413	0.52136	0.999834	0
RLG03969	-1.07797	0.0617932	0.999834	0
RLG04033	0.199218	0.676802	0.999834	0
RLG04036	-0.543021	0.355593	0.999834	0
RLG04051	0.23246	0.642338	0.999834	0
RLG04059	-0.117282	0.831886	0.999834	0
RLG04099	-0.764487	NA	NA	0
RLG04232	-0.0847654	0.825856	0.999834	0
RLG04235	0.00185686	0.997477	0.999834	0
RLG04335	0.15934	0.750732	0.999834	0
RLG04338	-0.306574	0.261254	0.999834	0
RLG04382	0.0524062	0.926323	0.999834	0
RLG04419	-0.00597925	0.986814	0.999834	0
RLG04532	0.360742	0.518809	0.999834	0
RLG04533	-0.352788	0.53966	0.999834	0
RLG04535	0.04464	0.907757	0.999834	0
RLG04573	0.397625	0.480193	0.999834	0
RLG04585	-0.151582	0.791452	0.999834	0
RLG04656	-0.242052	0.677348	0.999834	0
RLG04661	0.216022	0.707932	0.999834	0
RLG04684	0.209595	0.717584	0.999834	0
RLG04756	-0.410899	0.483756	0.999834	0
RLG04979	-0.214696	0.619448	0.999834	0
RLG05038	-0.523064	NA	NA	0
RLG05497	-0.338666	0.454658	0.999834	0
RLG05766	0.093442	0.757738	0.999834	0
RLG05984	0.01655	0.973572	0.999834	0
RLG06145	0.141092	0.748901	0.999834	0
RLG06352	0.2221	0.597959	0.999834	0
RLG06416	0.130114	0.780674	0.999834	0
RLG06581	-0.444303	0.448277	0.999834	0
RLG06606	-0.349231	0.435697	0.999834	0
RLG06670	-0.395645	0.494313	0.999834	0
RLG06975	0.395946	0.49237	0.999834	0
RLG07115	0.251769	0.651651	0.999834	0
RLG07315	-0.441822	0.392781	0.999834	0
RLG07331	0.581383	0.30448	0.999834	0
RLG07871	-0.477495	NA	NA	0
RLG08007	-0.348276	0.367934	0.999834	0
RLG08184	-0.365466	0.523906	0.999834	0
RLG08319	-0.394663	0.437846	0.999834	0
RLG08418	0.131706	0.817293	0.999834	0
RLG08444	-0.534087	0.33593	0.999834	0
RLG08474	0.195245	0.727615	0.999834	0
RLG08479	-0.16225	0.777174	0.999834	0
RLG08586	-0.266682	0.518211	0.999834	0
RLG08968	0.0941879	0.84923	0.999834	0
RLG09017	-0.0797824	0.883715	0.999834	0
RLG09332	0.203633	0.714474	0.999834	0
RLG09334	0.279824	0.614368	0.999834	0
RLG09435	0.73381	0.209825	0.999834	0
RLG09872	-0.91988	0.0840804	0.999834	0
RLG10120	-0.566756	0.188169	0.999834	0
RLG10335	0.675681	0.231486	0.999834	0
RLG10822	-0.463083	0.430683	0.999834	0
RLG10897	0.0358167	0.934868	0.999834	0
RLG11255	0.115225	0.764879	0.999834	0
RLG11354	0.00557401	0.98242	0.999834	0
RLG11930	-0.899566	0.0451631	0.999834	0
RLG12851	-0.180313	0.759076	0.999834	0
RLG13039	0.0564041	0.883603	0.999834	0
RLG13365	-0.0141807	0.970638	0.999834	0
RLG13853	0.0354707	0.941524	0.999834	0
RLG14023	0.170769	0.741552	0.999834	0
RLG14488	0.761917	0.194511	0.999834	0
RLG14777	-0.151597	0.79488	0.999834	0
RLG15541	0.41401	0.475214	0.999834	0
RLG15569	-0.0730013	0.849714	0.999834	0
RLG15636	0.289219	0.524301	0.999834	0
RLG15690	-0.0493985	0.92978	0.999834	0
RLG15817	0.139156	0.804528	0.999834	0
RLG16340	0.430909	0.394399	0.999834	0
RLG16354	-0.0928542	0.866295	0.999834	0
RLG16355	-0.697105	0.233826	0.999834	0
RLG17139	0.308889	0.597237	0.999834	0
RLG17398	0.0546057	0.901001	0.999834	0
RLG17414	-0.247839	0.602087	0.999834	0
RLG17447	-0.177597	0.730681	0.999834	0
RLG17552	-0.0847654	0.825856	0.999834	0
RLG17678	0.0949833	0.871238	0.999834	0
RLG17899	-0.565481	0.331888	0.999834	0
RLG17994	0.605631	0.30281	0.999834	0
RLG18005	0.029074	0.959742	0.999834	0
RLG18961	0.208191	0.647939	0.999834	0
RLG18986	-0.152676	0.759589	0.999834	0
RLG19054	0.310742	0.579123	0.999834	0
RLG19255	0.441469	0.1933	0.999834	0
RLG19445	-0.229791	0.68955	0.999834	0
RLG19578	0.0327264	0.95542	0.999834	0
RLG19590	-0.107878	0.853842	0.999834	0
RLG19597	-0.129387	0.77855	0.999834	0
RLG19955	0.334052	0.566225	0.999834	0
RLG19995	-0.15761	0.769153	0.999834	0
RLG20046	-0.22386	0.640849	0.999834	0
RLG20052	-0.0928511	0.87379	0.999834	0
RLG20066	-0.0773459	0.886839	0.999834	0
RLG20075	0.281901	0.542531	0.999834	0
RLG20437	-0.206685	0.56468	0.999834	0
RLG20467	0.0507601	0.927999	0.999834	0
RLG20539	-0.41711	NA	NA	0
RLG20650	0.00359385	0.99512	0.999834	0
RLG20670	-0.146249	0.759478	0.999834	0
RLG20725	0.226627	0.656871	0.999834	0
RLG20837	0.0891007	0.879442	0.999834	0
RLG21047	0.500724	0.191571	0.999834	0
RLG21175	-0.452497	0.383956	0.999834	0
RLG21296	-0.627011	0.16391	0.999834	0
RLG21312	-0.211359	0.698081	0.999834	0
RLG21377	0.115225	0.764879	0.999834	0
RLG21400	-0.0787809	0.886986	0.999834	0
RLG21558	0.670813	0.253313	0.999834	0
RLG21734	-0.231407	0.641633	0.999834	0
RLG22027	0.643572	0.248289	0.999834	0
RLG22036	-0.102365	0.852216	0.999834	0
RLG22460	0.291542	0.615364	0.999834	0
RLG22597	1.07397	0.0295622	0.999834	0
RLG22663	0.169507	0.753287	0.999834	0
RLG22680	0.132528	0.776966	0.999834	0
RLG22693	0.00182363	0.997203	0.999834	0
RLG22789	0.178102	0.747878	0.999834	0
RLG23128	-0.245869	NA	NA	0
RLG23474	0.0190923	0.94472	0.999834	0
RLG23559	0.229023	0.637047	0.999834	0
RLG23602	-0.105096	0.844326	0.999834	0
RLG23605	-0.520954	0.374539	0.999834	0
RLG23973	-0.10808	0.750556	0.999834	0
RLG24080	0.506176	0.32989	0.999834	0
RLG24107	-0.41779	0.457413	0.999834	0
RLG24200	0.248599	0.661907	0.999834	0
RLG24474	-0.101395	0.836796	0.999834	0
RLG24485	0.107775	0.854125	0.999834	0
RLG24508	0.114104	0.82758	0.999834	0
RLG24519	-0.386674	0.459615	0.999834	0
RLG24520	-0.241597	0.675531	0.999834	0
RLG24549	-0.130478	0.821025	0.999834	0
RLG24976	-0.117415	0.841203	0.999834	0
RLG24992	-0.0742178	0.899479	0.999834	0
RLG25028	0.0459564	0.861838	0.999834	0
RLG25029	0.22319	0.552766	0.999834	0
RLG25032	-0.133803	0.777721	0.999834	0
RLG25033	0.151859	0.790825	0.999834	0
RLG25035	-0.0958586	0.820899	0.999834	0
RLG25036	0.062923	0.9136	0.999834	0
RLG25041	-0.161558	0.674509	0.999834	0
RLG25047	-0.156892	0.775063	0.999834	0
RLG25049	-0.325024	0.557789	0.999834	0
RLG25077	0.279359	0.506883	0.999834	0
RLG25103	0.344189	0.502008	0.999834	0
RLG25106	-0.153684	0.792649	0.999834	0
RLG25128	-0.0213352	0.971028	0.999834	0
RLG25161	-0.334138	0.298111	0.999834	0
RLG25164	0.0797392	0.767944	0.999834	0
RLG25198	0.241333	0.395301	0.999834	0
RLG25238	-0.103467	0.844542	0.999834	0
RLG25258	0.486554	0.251775	0.999834	0
RLG25362	-0.0772831	0.883597	0.999834	0
RLG25402	0.0299352	0.938956	0.999834	0
RLG25430	-0.373046	0.506775	0.999834	0
RLG25479	0.0564041	0.883603	0.999834	0
RLG25519	0.0726591	0.901476	0.999834	0
RLG25535	0.154987	0.703461	0.999834	0
RLG25538	0.164362	0.742768	0.999834	0
RLG25551	-0.629825	0.236059	0.999834	0
RLG25634	0.0754438	0.878207	0.999834	0
RLG25639	0.118171	0.836624	0.999834	0
RLG25680	0.244366	0.652058	0.999834	0
RLG25737	-0.507237	NA	NA	0
RLG25812	-0.14992	0.766378	0.999834	0
RLG25864	-0.0787539	0.841095	0.999834	0
RLG25951	0.717417	NA	NA	0
RLG25957	-0.0169328	0.962678	0.999834	0
RLG26019	0.0937289	0.858716	0.999834	0
RLG26287	-0.07728	0.864448	0.999834	0
RLG26300	0.120572	0.83365	0.999834	0
RLG26301	0.348184	0.496452	0.999834	0
RLG26486	-0.463634	0.413863	0.999834	0
RLG26679	-0.575013	0.323363	0.999834	0
RLG26868	-0.534131	0.0835301	0.999834	0
RLG26931	-0.286125	0.572534	0.999834	0
RLG26996	0.349918	0.540738	0.999834	0
RLG27110	-0.194825	0.73976	0.999834	0
RLG27136	0.0756947	0.897031	0.999834	0
RLG27284	0.14625	0.800624	0.999834	0
RLG27291	-0.0072039	0.990171	0.999834	0
RLG27373	-0.0632477	0.902865	0.999834	0
RLG27635	0.540773	0.353601	0.999834	0
RLG27636	0.163064	0.769424	0.999834	0
RLG27690	-0.0378385	0.945247	0.999834	0
RLG27833	-0.0180068	0.972573	0.999834	0
RLG27960	0.141104	0.801574	0.999834	0
RLG27993	-0.973739	0.0880335	0.999834	0
RLG28155	-0.494779	0.357801	0.999834	0
RLG28269	0.0892497	0.86307	0.999834	0
RLG28277	0.322973	NA	NA	0
RLG28543	-0.120491	0.827135	0.999834	0
RLG28597	0.847827	0.136499	0.999834	0
RLG28700	0.145397	0.804638	0.999834	0
RLG29001	-0.269087	0.555391	0.999834	0
RLG29259	0.2997	0.242189	0.999834	0
RLG29307	0.67423	0.221926	0.999834	0
RLG29328	0.0453275	0.931638	0.999834	0
RLG29480	-0.132055	0.821176	0.999834	0
RLG29542	0.919992	0.112757	0.999834	0
RLG29799	-0.114061	0.844903	0.999834	0
RLG29860	0.098882	0.859858	0.999834	0
RLG29871	0.40994	NA	NA	0
RLG30127	0.0217032	0.96906	0.999834	0
RLG30142	-0.207343	0.558939	0.999834	0
RLG30183	-0.0489373	0.927482	0.999834	0
RLG30190	-0.00353939	0.98912	0.999834	0
RLG30289	-0.0983871	0.858394	0.999834	0
RLG30337	-0.297434	0.594096	0.999834	0
RLG30345	0.814286	0.165934	0.999834	0
RLG30363	0.223108	0.703957	0.999834	0
RLG30464	0.143379	0.790259	0.999834	0
RLG30656	0.314943	0.591712	0.999834	0
RLG30972	-1.08911	0.058905	0.999834	0
RLG31034	-0.206995	0.724725	0.999834	0
RLG31065	-0.360616	0.539607	0.999834	0
RLG31148	0.540777	0.221069	0.999834	0
RLG31322	0.366425	0.419019	0.999834	0
RLG31325	-0.147797	0.77832	0.999834	0
RLG31468	-0.450657	NA	NA	0
RLG31570	-0.21355	0.674155	0.999834	0
RLG31592	-0.0483025	0.920025	0.999834	0
RLG32361	0.0566134	0.89366	0.999834	0
RLG32362	-0.111158	0.834147	0.999834	0
RLG32500	-0.41423	0.480926	0.999834	0
RLG32863	0.0671238	0.906628	0.999834	0
RLG33190	-0.560506	0.326833	0.999834	0
RLG33195	0.0259512	0.964659	0.999834	0
RLG33233	0.134039	0.819213	0.999834	0
RLG33512	0.919211	0.0971415	0.999834	0
RLG34313	-0.0233108	0.960987	0.999834	0
RLG34355	-0.20483	0.492082	0.999834	0
RLG34617	-0.0554149	0.922752	0.999834	0
RLG35020	-0.280331	0.631878	0.999834	0
RLG35110	0.187741	0.63621	0.999834	0
RLG35233	-0.427883	0.466741	0.999834	0
RLG35255	-0.242839	0.645932	0.999834	0
RLG35362	0.132783	0.671144	0.999834	0
RLG35396	-0.0513578	0.870602	0.999834	0
RLG35704	-0.291149	0.616527	0.999834	0
RLG35857	-0.0141807	0.970638	0.999834	0
RLG36018	0.904624	0.123003	0.999834	0
RLG36069	0.172253	0.768821	0.999834	0
RLX00065	-0.31307	0.342263	0.999834	0
RLX00088	0.127988	0.460852	0.999834	0
RLX00092	0.938318	0.0254419	0.999834	0
RLX00094	0.128301	0.734934	0.999834	0
RLX00144	0.159952	0.732786	0.999834	0
RLX00168	0.152775	0.747356	0.999834	0
RLX00171	0.579524	0.320968	0.999834	0
RLX00172	0.209392	0.544885	0.999834	0
RLX00210	1.07432	0.0369392	0.999834	0
RLX00219	0.352314	0.256155	0.999834	0
RLX00220	0.103364	0.823271	0.999834	0
RLX00230	0.362035	0.524108	0.999834	0
RLX00245	0.96192	0.0622973	0.999834	0
RLX00262	-0.105321	0.80501	0.999834	0
RLX00315	-0.185009	0.752503	0.999834	0
RLX00346	-0.00584645	0.986449	0.999834	0
RLX00394	-0.0757947	0.896735	0.999834	0
RLX00431	0.514432	0.223125	0.999834	0
RLX00458	0.349917	0.372908	0.999834	0
RLX00487	-0.141201	0.810133	0.999834	0
RLX00506	0.0427914	0.941872	0.999834	0
RLX00518	-0.494242	0.382348	0.999834	0
RLX00532	-0.199857	0.694871	0.999834	0
RLX00578	0.154472	0.661257	0.999834	0
RLX00579	0.492212	0.301245	0.999834	0
RLX00594	0.0554997	0.846645	0.999834	0
RLX00605	-0.148019	0.447497	0.999834	0
RLX00623	0.10566	0.857324	0.999834	0
RLX00629	-0.239647	0.674077	0.999834	0
RLX00643	-0.152242	0.778754	0.999834	0
RLX00671	0.363143	0.382799	0.999834	0
RLX00677	0.839108	0.153329	0.999834	0
RLX00705	1.04062	0.0433098	0.999834	0
RLX00707	-0.0897728	0.876108	0.999834	0
RLX00710	0.734028	0.207783	0.999834	0
RLX00731	-0.0422123	0.905625	0.999834	0
RLX00793	0.0716612	0.902978	0.999834	0
RLX00809	-0.206132	0.552942	0.999834	0
RLX00811	0.0763511	0.776156	0.999834	0
RLX00813	0.528367	0.297377	0.999834	0
RLX00817	-0.0979117	0.79189	0.999834	0
RLX00828	-0.151025	0.719283	0.999834	0
RLX00832	-0.185333	0.746128	0.999834	0
RLX00852	0.111288	0.803724	0.999834	0
RLX00909	0.246683	0.312064	0.999834	0
RLX00922	-0.0258293	0.960164	0.999834	0
RLX00929	0.091544	0.831067	0.999834	0
RLX00934	-0.315649	0.59086	0.999834	0
RLX00937	-0.106445	0.85632	0.999834	0
RLX00954	0.0471862	0.915114	0.999834	0
RLX01027	0.180482	0.758226	0.999834	0
RLX01089	-0.411612	0.327612	0.999834	0
RLX01114	-0.00562046	0.989017	0.999834	0
RLX01133	1.13732	0.0486664	0.999834	0
RLX01197	0.305595	0.415887	0.999834	0
RLX01200	-0.238855	0.66594	0.999834	0
RLX01207	0.115397	0.812028	0.999834	0
RLX01223	0.116316	0.805063	0.999834	0
RLX01266	-0.327885	0.554644	0.999834	0
RLX01271	0.413741	0.399701	0.999834	0
RLX01316	0.089049	0.858988	0.999834	0
RLX01321	0.0132486	0.981194	0.999834	0
RLX01384	0.582329	0.321346	0.999834	0
RLX01405	0.254667	0.640823	0.999834	0
RLX01412	-0.69875	NA	NA	0
RLX01624	-0.246704	0.654786	0.999834	0
RLX01643	0.0354943	0.871926	0.999834	0
RLX01753	-0.0628405	0.914114	0.999834	0
RLX01770	0.0652791	0.90925	0.999834	0
RLX01782	0.775942	0.113133	0.999834	0
RLX01828	0.80442	0.0533541	0.999834	0
RLX01839	0.163585	0.775133	0.999834	0
RLX01902	0.607193	0.295129	0.999834	0
RLX01909	-0.365068	0.37023	0.999834	0
RLX01922	-0.16128	0.772643	0.999834	0
RLX01963	-0.0898179	0.876076	0.999834	0
RLX02012	0.160112	0.783655	0.999834	0
RLX02031	0.000182585	0.999748	0.999834	0
RLX02040	0.298471	0.364086	0.999834	0
RLX02045	0.270302	0.645483	0.999834	0
RLX02076	-0.278132	0.629338	0.999834	0
RLX02077	0.124657	0.789829	0.999834	0
RLX02087	0.539586	0.168006	0.999834	0
RLX02107	0.122211	0.835328	0.999834	0
RLX02112	-0.226164	0.700195	0.999834	0
RLX02250	0.205335	0.634028	0.999834	0
RLX02353	0.406803	0.426818	0.999834	0
RLX02361	-0.296539	0.603056	0.999834	0
RLX02379	0.0413321	0.940909	0.999834	0
RLX02405	-0.186875	0.659326	0.999834	0
RLX02430	-0.43585	0.409237	0.999834	0
RLX02478	0.244833	0.666364	0.999834	0
RLX02481	-0.277726	0.587434	0.999834	0
RLX02488	0.106971	0.823688	0.999834	0
RLX02505	0.245704	0.656558	0.999834	0
RLX02566	0.330301	0.411541	0.999834	0
RLX02581	-0.312615	NA	NA	0
RLX02654	-0.0828005	0.884273	0.999834	0
RLX02685	-0.0141807	0.970638	0.999834	0
RLX02686	0.26634	0.533699	0.999834	0
RLX02737	-0.142859	0.788312	0.999834	0
RLX02773	0.668989	0.253865	0.999834	0
RLX02796	-0.344793	0.391309	0.999834	0
RLX02798	-0.408387	0.481173	0.999834	0
RLX02870	0.13315	0.78949	0.999834	0
RLX02872	0.393087	0.487624	0.999834	0
RLX02922	0.126966	0.826766	0.999834	0
RLX02928	-0.390209	0.481737	0.999834	0
RLX02944	-0.189441	0.72884	0.999834	0
RLX02971	0.132793	0.820734	0.999834	0
RLX03026	-0.0470717	0.932486	0.999834	0
RLX03052	-0.161039	0.565439	0.999834	0
RLX03058	-0.108324	0.853801	0.999834	0
RLX03092	0.46391	0.343989	0.999834	0
RLX03133	0.286279	0.468776	0.999834	0
RLX03151	-0.118591	0.832981	0.999834	0
RLX03164	-0.337887	0.520182	0.999834	0
RLX03190	-0.0141807	0.970638	0.999834	0
RLX03228	-0.171871	0.765895	0.999834	0
RLX03232	-0.0540891	0.923817	0.999834	0
RLX03247	-0.158661	0.782236	0.999834	0
RLX03288	-0.10313	0.81773	0.999834	0
RLX03360	0.231414	0.684865	0.999834	0
RLX03389	0.320632	0.584636	0.999834	0
RLX03449	0.0987295	0.866511	0.999834	0
RLX03511	-0.406874	0.472149	0.999834	0
RLX03534	-0.134801	0.812134	0.999834	0
RLX03572	0.431471	0.303895	0.999834	0
RLX03581	0.125367	0.831097	0.999834	0
RLX03596	0.381855	0.413436	0.999834	0
RLX03600	0.119068	0.836387	0.999834	0
RLX03724	0.0123727	0.966478	0.999834	0
RLX03748	-0.210743	0.716467	0.999834	0
RLX03765	-0.0910222	0.857581	0.999834	0
RLX03794	-0.195453	0.715411	0.999834	0
RLX03837	-0.168134	0.67444	0.999834	0
RLX03862	0.205976	0.72488	0.999834	0
RLX03878	0.332212	0.513629	0.999834	0
RLX03926	-0.103313	0.845352	0.999834	0
RLX04016	0.319291	0.516607	0.999834	0
RLX04034	0.185825	0.75169	0.999834	0
RLX04077	0.00552846	0.989805	0.999834	0
RLX04087	-0.411905	0.365678	0.999834	0
RLX04096	0.142584	0.80566	0.999834	0
RLX04110	-0.292808	0.618445	0.999834	0
RLX04115	-0.0611859	0.853913	0.999834	0
RLX04152	-0.088573	0.860063	0.999834	0
RLX04323	-0.243982	0.451522	0.999834	0
RLX04345	-0.307556	0.383746	0.999834	0
RLX04358	-0.210951	0.692513	0.999834	0
RLX04368	-0.55295	0.317037	0.999834	0
RLX04386	-0.135124	0.547552	0.999834	0
RLX04404	-0.248318	0.574119	0.999834	0
RLX04512	0.153615	0.640781	0.999834	0
RLX04643	0.206984	0.723273	0.999834	0
RLX04715	-0.156949	0.788448	0.999834	0
RLX04762	-0.337661	0.481236	0.999834	0
RLX04849	-0.506105	0.372473	0.999834	0
RLX04933	-0.170387	0.771916	0.999834	0
RLX04934	0.513066	0.282231	0.999834	0
RLX04973	-0.516149	0.341445	0.999834	0
RLX04977	-0.0114461	0.984353	0.999834	0
RLX04982	-0.380353	0.418724	0.999834	0
RLX05003	-0.771656	0.162045	0.999834	0
RLX05032	-0.189255	0.363165	0.999834	0
RLX05046	-0.387677	0.295488	0.999834	0
RLX05056	0.0190496	0.969096	0.999834	0
RLX05164	0.051677	0.90381	0.999834	0
RLX05186	-0.0823972	0.887991	0.999834	0
RLX05195	-0.108884	0.852993	0.999834	0
RLX05229	-0.296198	0.575891	0.999834	0
RLX05283	0.0619704	0.915477	0.999834	0
RLX05302	0.286258	0.62464	0.999834	0
RLX05333	0.125158	0.827913	0.999834	0
RLX05471	0.201644	0.656727	0.999834	0
RLX05505	-0.0263435	0.925888	0.999834	0
RLX05513	-0.160965	0.782741	0.999834	0
RLX05520	0.118225	0.839838	0.999834	0
RLX05611	0.372201	0.380959	0.999834	0
RLX05619	0.267394	0.648593	0.999834	0
RLX05638	0.00196954	0.996269	0.999834	0
RLX05661	-0.294631	0.615565	0.999834	0
RLX05685	-0.142603	0.74562	0.999834	0
RLX05709	0.0691059	0.897174	0.999834	0
RLX05820	-0.00751743	0.989366	0.999834	0
RLX05877	0.0863914	0.879907	0.999834	0
RLX05880	-0.161882	NA	NA	0
RLX06028	0.115225	0.764879	0.999834	0
RLX06074	0.0929916	0.873621	0.999834	0
RLX06088	0.0127935	0.970546	0.999834	0
RLX06192	-0.546166	0.331143	0.999834	0
RLX06206	0.0248425	0.965625	0.999834	0
RLX06292	-0.0737324	0.899511	0.999834	0
RLX06318	0.442122	0.443387	0.999834	0
RLX06389	-0.0664042	0.908902	0.999834	0
RLX06470	-0.339073	0.502978	0.999834	0
RLX06479	-0.50266	0.159798	0.999834	0
RLX06495	0.284869	0.602928	0.999834	0
RLX06520	0.104251	0.858566	0.999834	0
RLX06560	0.310962	0.519128	0.999834	0
RLX06613	0.374358	0.45864	0.999834	0
RLX06699	0.610258	0.175629	0.999834	0
RLX06784	0.499592	0.241786	0.999834	0
RLX06802	0.778582	0.165458	0.999834	0
RLX06812	0.463543	0.371171	0.999834	0
RLX06820	-0.167442	0.381274	0.999834	0
RLX06834	0.140801	0.753597	0.999834	0
RLX06841	0.0333729	0.945632	0.999834	0
RLX06887	0.00975356	0.986736	0.999834	0
RLX06897	-0.2829	0.5486	0.999834	0
RLX06900	0.409467	0.404873	0.999834	0
RLX06908	0.0603819	0.910924	0.999834	0
RLX06974	0.206317	0.654834	0.999834	0
RLX06989	-0.484869	0.37937	0.999834	0
RLX07019	-0.583083	0.259256	0.999834	0
RLX07080	-0.142183	0.792904	0.999834	0
RLX07082	-0.203308	0.726799	0.999834	0
RLX07172	-0.0392779	0.900669	0.999834	0
RLX07195	-0.385264	0.48695	0.999834	0
RLX07255	0.0109038	0.981258	0.999834	0
RLX07257	-0.41578	0.477412	0.999834	0
RLX07301	0.286903	0.620403	0.999834	0
RLX07325	-0.161945	0.772749	0.999834	0
RLX07330	0.0701074	0.902016	0.999834	0
RLX07379	0.237986	0.657922	0.999834	0
RLX07399	0.105236	0.843039	0.999834	0
RLX07418	0.0133584	0.981868	0.999834	0
RLX07434	0.0653522	0.9106	0.999834	0
RLX07477	-0.333898	0.535066	0.999834	0
RLX07508	0.648065	0.200384	0.999834	0
RLX07558	-0.0580867	0.916482	0.999834	0
RLX07570	0.446235	0.407084	0.999834	0
RLX07587	-0.412502	0.31063	0.999834	0
RLX07598	0.0785195	0.893731	0.999834	0
RLX07651	0.117256	0.836505	0.999834	0
RLX07660	0.104308	0.843775	0.999834	0
RLX07781	-0.056444	0.862072	0.999834	0
RLX07792	-0.188018	0.694895	0.999834	0
RLX07853	-0.111407	0.804706	0.999834	0
RLX07876	-0.263977	0.534082	0.999834	0
RLX07915	0.0925559	0.874757	0.999834	0
RLX07949	-0.391489	0.497253	0.999834	0
RLX08022	0.0364913	0.912737	0.999834	0
RLX08105	-0.16412	0.770167	0.999834	0
RLX08106	-0.143683	0.792265	0.999834	0
RLX08113	-0.0141807	0.970638	0.999834	0
RLX08123	-0.074195	0.899558	0.999834	0
RLX08152	0.514796	NA	NA	0
RLX08161	-0.515862	0.349915	0.999834	0
RLX08174	0.284544	0.568334	0.999834	0
RLX08254	0.0918944	0.855547	0.999834	0
RLX08277	0.290158	0.620216	0.999834	0
RLX08282	-0.674804	0.198771	0.999834	0
RLX08337	0.115225	0.764879	0.999834	0
RLX08353	-0.21449	0.519133	0.999834	0
RLX08355	-0.812058	0.128245	0.999834	0
RLX08363	0.248121	0.653958	0.999834	0
RLX08369	0.383144	0.507316	0.999834	0
RLX08378	-0.397595	0.38282	0.999834	0
RLX08400	0.315323	0.590445	0.999834	0
RLX08403	0.0397502	0.941797	0.999834	0
RLX08416	0.0235728	0.964189	0.999834	0
RLX08423	0.341957	0.560615	0.999834	0
RLX08562	-0.681966	0.24539	0.999834	0
RLX08791	-0.120823	0.836513	0.999834	0
RLX08800	-0.119622	0.83877	0.999834	0
RLX08841	-0.409874	0.168973	0.999834	0
RLX08863	0.536064	0.352832	0.999834	0
RLX08894	-0.0147833	0.97981	0.999834	0
RLX09025	0.00283708	0.995961	0.999834	0
RLX09089	-0.0569493	0.908296	0.999834	0
RLX09105	0.0682994	0.907504	0.999834	0
RLX09106	0.567447	0.329127	0.999834	0
RLX09129	-0.13218	0.822104	0.999834	0
RLX09145	0.121748	0.829046	0.999834	0
RLX09271	-0.12439	0.831427	0.999834	0
RLX09331	0.18745	0.749177	0.999834	0
RLX09362	-0.133878	0.818403	0.999834	0
RLX09379	-0.0351181	0.950384	0.999834	0
RLX09385	-0.0311864	0.865754	0.999834	0
RLX09434	0.188651	0.743043	0.999834	0
RLX09450	0.328127	0.494664	0.999834	0
RLX09507	-0.198021	0.666899	0.999834	0
RLX09579	0.50319	NA	NA	0
RLX09603	0.281066	0.400323	0.999834	0
RLX09740	-0.130724	0.821743	0.999834	0
RLX09845	-0.0273808	0.962776	0.999834	0
RLX09938	0.231012	0.645192	0.999834	0
RLX09945	-0.027407	0.962804	0.999834	0
RLX09948	0.0521807	0.927156	0.999834	0
RLX10013	0.299782	0.604515	0.999834	0
RLX10023	0.0206014	0.961977	0.999834	0
RLX10025	0.280695	0.529901	0.999834	0
RLX10027	-0.00326375	0.988183	0.999834	0
RLX10125	0.0925907	0.842018	0.999834	0
RLX10185	0.144036	0.724633	0.999834	0
RLX10263	-0.183487	0.704388	0.999834	0
RLX10294	-0.0994486	0.848054	0.999834	0
RLX10314	0.451471	0.363447	0.999834	0
RLX10329	0.249391	0.66617	0.999834	0
RLX10446	0.342937	0.516019	0.999834	0
RLX10449	0.43448	0.459296	0.999834	0
RLX10570	-0.520107	0.376233	0.999834	0
RLX10610	-0.228511	0.679034	0.999834	0
RLX10623	0.201017	0.72685	0.999834	0
RLX10624	-0.293715	0.510604	0.999834	0
RLX10633	0.000120363	0.999834	0.999834	0
RLX10648	-0.306615	0.56455	0.999834	0
RLX10649	0.324638	0.451957	0.999834	0
RLX10654	0.162763	0.779187	0.999834	0
RLX10659	0.982913	NA	NA	0
RLX10700	-0.00893006	0.983388	0.999834	0
RLX10705	0.644864	0.248622	0.999834	0
RLX10775	-0.25266	0.65602	0.999834	0
RLX10776	-0.424522	0.455567	0.999834	0
RLX10791	0.408359	0.447696	0.999834	0
RLX10838	0.270251	0.582048	0.999834	0
RLX10887	0.143586	0.782708	0.999834	0
RLX10891	0.0781595	0.781812	0.999834	0
RLX10956	0.167247	NA	NA	0
RLX11017	-0.0730013	0.849714	0.999834	0
RLX11056	0.236509	0.665212	0.999834	0
RLX11100	0.358488	0.501619	0.999834	0
RLX11120	0.115126	0.84342	0.999834	0
RLX11131	0.632679	0.280843	0.999834	0
RLX11173	-0.148667	0.671395	0.999834	0
RLX11258	-0.248875	0.603943	0.999834	0
RLX11358	0.1843	0.619923	0.999834	0
RLX11384	0.254728	0.405166	0.999834	0
RLX11418	0.246964	0.673366	0.999834	0
RLX11457	0.0714973	0.898092	0.999834	0
RLX11462	0.212688	0.717526	0.999834	0
RLX11500	1.00702	0.0569376	0.999834	0
RLX11526	-0.512354	0.00531981	0.814263	0
RLX11560	0.579067	0.324558	0.999834	0
RLX11571	-0.131299	0.805484	0.999834	0
RLX11572	0.0802277	0.802167	0.999834	0
RLX11647	0.194737	0.495154	0.999834	0
RLX11717	0.170112	0.763974	0.999834	0
RLX11758	-0.462631	0.321909	0.999834	0
RLX11860	-0.0198094	0.972877	0.999834	0
RLX11878	0.802359	NA	NA	0
RLX11946	-0.379913	0.37403	0.999834	0
RLX11955	-0.283216	0.597431	0.999834	0
RLX12013	-0.747939	0.194138	0.999834	0
RLX12033	-0.280201	0.61602	0.999834	0
RLX12037	-0.606196	0.0807385	0.999834	0
RLX12050	-0.159246	0.785007	0.999834	0
RLX12074	-0.222013	0.704076	0.999834	0
RLX12102	0.239403	0.681398	0.999834	0
RLX12114	0.176408	0.759464	0.999834	0
RLX12134	0.323513	0.549716	0.999834	0
RLX12138	-0.236932	0.674929	0.999834	0
RLX12147	0.0256373	0.96515	0.999834	0
RLX12164	-0.363811	0.502411	0.999834	0
RLX12188	0.219742	0.668482	0.999834	0
RLX12189	0.31823	0.54923	0.999834	0
RLX12192	-0.366037	0.496162	0.999834	0
RLX12193	0.819047	0.154326	0.999834	0
RLX12228	-0.110865	0.844184	0.999834	0
RLX12294	0.115743	0.842777	0.999834	0
RLX12489	0.0987543	0.86627	0.999834	0
RLX12606	0.69264	0.14835	0.999834	0
RLX12619	0.233037	0.673696	0.999834	0
RLX12625	0.270668	0.298542	0.999834	0
RLX12696	0.182117	0.665332	0.999834	0
RLX12813	-0.276667	0.613125	0.999834	0
RLX12841	-0.106183	0.75441	0.999834	0
RLX12855	-0.242705	0.676825	0.999834	0
RLX12908	0.270265	0.586323	0.999834	0
RLX12923	-0.438393	0.194882	0.999834	0
RLX12995	0.514866	0.295445	0.999834	0
RLX13010	-0.223511	0.676349	0.999834	0
RLX13040	0.495819	0.396234	0.999834	0
RLX13049	0.191271	0.732431	0.999834	0
RLX13087	0.157149	0.768022	0.999834	0
RLX13116	-0.55095	0.274147	0.999834	0
RLX13146	0.693293	0.162582	0.999834	0
RLX13198	0.141854	0.756449	0.999834	0
RLX13236	-0.151688	0.751926	0.999834	0
RLX13285	-0.604455	0.301354	0.999834	0
RLX13336	-0.0867395	0.87018	0.999834	0
RLX13356	-0.181086	0.746264	0.999834	0
RLX13390	-0.457013	0.273949	0.999834	0
RLX13439	0.481296	NA	NA	0
RLX13443	0.0403381	0.92409	0.999834	0
RLX13457	0.0798102	0.842633	0.999834	0
RLX13500	-0.497682	0.389935	0.999834	0
RLX13504	-0.347624	0.484701	0.999834	0
RLX13626	0.0805525	0.886499	0.999834	0
RLX13630	-0.170602	0.763426	0.999834	0
RLX13674	-0.374943	0.520594	0.999834	0
RLX13690	-0.939038	0.0962816	0.999834	0
RLX13737	0.13061	0.770513	0.999834	0
RLX13792	-0.141889	0.734544	0.999834	0
RLX13794	-0.0801693	0.889824	0.999834	0
RLX13796	-0.0698499	0.683211	0.999834	0
RLX13835	-0.0561924	0.913724	0.999834	0
RLX13849	0.0366132	0.944512	0.999834	0
RLX13865	0.492209	0.274644	0.999834	0
RLX13906	-0.112316	0.669913	0.999834	0
RLX13918	-0.157345	0.773714	0.999834	0
RLX13932	-0.0909076	0.872093	0.999834	0
RLX14012	-0.434727	0.300351	0.999834	0
RLX14098	0.206389	0.725359	0.999834	0
RLX14145	-0.250564	0.661046	0.999834	0
RLX14175	0.373144	0.525636	0.999834	0
RLX14372	-0.00736275	0.98513	0.999834	0
RLX14382	0.170134	0.77229	0.999834	0
RLX14426	-0.0919253	0.875715	0.999834	0
RLX14427	-0.0456111	0.93634	0.999834	0
RLX14467	0.0764308	0.895715	0.999834	0
RLX14469	-0.060416	0.917697	0.999834	0
RLX14484	0.0579958	0.892682	0.999834	0
RLX14499	-0.157627	0.780611	0.999834	0
RLX14502	0.298968	0.514295	0.999834	0
RLX14529	0.431576	0.449749	0.999834	0
RLX14540	0.723098	0.110212	0.999834	0
RLX14542	-0.270159	0.623556	0.999834	0
RLX14568	0.025669	0.925356	0.999834	0
RLX14569	0.00658511	0.990798	0.999834	0
RLX14653	0.110964	0.850291	0.999834	0
RLX14681	-0.157333	0.781765	0.999834	0
RLX14685	-0.280761	0.592338	0.999834	0
RLX14698	0.116014	0.836205	0.999834	0
RLX14713	0.127827	0.822396	0.999834	0
RLX14755	0.450609	0.351374	0.999834	0
RLX14765	0.0938767	0.853355	0.999834	0
RLX14778	-0.115649	0.842245	0.999834	0
RLX14786	0.292352	0.569913	0.999834	0
RLX14812	0.15126	0.790944	0.999834	0
RLX14842	0.0404181	0.939342	0.999834	0
RLX14872	0.417698	0.420437	0.999834	0
RLX14874	0.526845	0.176474	0.999834	0
RLX14918	-0.178305	0.761283	0.999834	0
RLX14929	-0.265601	0.638092	0.999834	0
RLX15051	0.0200493	0.972794	0.999834	0
RLX15127	-0.132073	0.822199	0.999834	0
RLX15143	0.741796	0.200828	0.999834	0
RLX15151	-0.14311	0.798884	0.999834	0
RLX15226	-0.137438	0.81032	0.999834	0
RLX15320	0.403535	0.492106	0.999834	0
RLX15333	-0.0380836	0.937162	0.999834	0
RLX15389	-1.2693	0.0259531	0.999834	0
RLX15438	0.075824	0.740006	0.999834	0
RLX15492	-0.0353558	0.951993	0.999834	0
RLX15510	-0.0930865	0.872813	0.999834	0
RLX15516	1.03132	0.0354644	0.999834	0
RLX15517	0.110237	0.836421	0.999834	0
RLX15524	0.127041	0.7601	0.999834	0
RLX15582	0.287435	0.291486	0.999834	0
RLX15644	0.463915	0.420014	0.999834	0
RLX15666	-0.345374	0.556871	0.999834	0
RLX15682	-0.0456216	0.938143	0.999834	0
RLX15723	0.125752	0.792375	0.999834	0
RLX15762	0.169202	0.772241	0.999834	0
RLX16019	0.146936	0.785951	0.999834	0
RLX16022	0.745541	NA	NA	0
RLX16059	-0.0322377	0.951037	0.999834	0
RLX16143	-0.547809	NA	NA	0
RLX16153	0.0412646	0.939694	0.999834	0
RLX16154	0.273404	0.638761	0.999834	0
RLX16161	0.280515	0.63323	0.999834	0
RLX16163	0.420874	0.464264	0.999834	0
RLX16183	-0.225189	0.668894	0.999834	0
RLX16191	0.667059	0.25474	0.999834	0
RLX16338	-0.570395	NA	NA	0
RLX16360	0.141381	0.642703	0.999834	0
RLX16374	0.142014	0.808915	0.999834	0
RLX16381	0.0556453	0.91547	0.999834	0
RLX16405	-0.278518	0.604091	0.999834	0
RLX16436	0.627878	0.226131	0.999834	0
RLX16464	-0.139569	0.791878	0.999834	0
RLX16763	-0.167893	0.767425	0.999834	0
RLX16777	-0.710393	0.0919798	0.999834	0
RLX16943	0.00893534	0.984955	0.999834	0
RLX16953	0.464017	0.429835	0.999834	0
RLX16954	-0.0121605	0.960924	0.999834	0
RLX16979	0.614559	0.266292	0.999834	0
RLX16988	0.781027	0.182895	0.999834	0
RLX17003	-0.0977986	0.730119	0.999834	0
RLX17037	0.196614	0.517193	0.999834	0
RLX17043	-0.0895619	0.871063	0.999834	0
RLX17047	0.108239	0.783131	0.999834	0
RLX17057	-0.373385	0.327633	0.999834	0
RLX17087	-0.138047	0.734936	0.999834	0
RLX17189	0.389145	0.484129	0.999834	0
RLX17254	-0.532252	0.0792053	0.999834	0
RLX17260	0.16573	0.637187	0.999834	0
RLX17263	0.406647	0.442998	0.999834	0
RLX17298	-0.579668	NA	NA	0
RLX17336	0.218491	0.702454	0.999834	0
RLX17340	0.154139	0.780235	0.999834	0
RLX17379	0.148615	0.66659	0.999834	0
RLX17388	-0.134913	0.565942	0.999834	0
RLX17389	-0.203573	0.729114	0.999834	0
RLX17392	0.145559	0.719437	0.999834	0
RLX17433	0.290105	0.532794	0.999834	0
RLX17442	0.0174853	0.975322	0.999834	0
RLX17489	0.151476	0.511799	0.999834	0
RLX17542	-0.382737	NA	NA	0
RLX17643	-0.378448	0.368392	0.999834	0
RLX17644	0.226689	0.579067	0.999834	0
RLX17748	0.76114	0.154773	0.999834	0
RLX17749	-0.483623	0.385806	0.999834	0
RLX17842	-0.0175994	0.969361	0.999834	0
RLX17849	0.385186	0.284349	0.999834	0
RLX17860	0.0680257	0.887375	0.999834	0
RLX17862	-0.288661	0.615821	0.999834	0
RLX17884	-0.155955	0.566895	0.999834	0
RLX17892	0.058315	0.866471	0.999834	0
RLX17916	0.111184	0.837815	0.999834	0
RLX17918	0.142816	0.775485	0.999834	0
RLX17927	0.453525	0.299245	0.999834	0
RLX18027	-0.362113	0.53783	0.999834	0
RLX18153	0.115225	0.764879	0.999834	0
RLX18225	0.174564	0.6294	0.999834	0
RLX18269	0.120387	0.802176	0.999834	0
RLX18282	0.504545	0.387945	0.999834	0
RLX18287	0.0300918	0.876257	0.999834	0
RLX18347	0.183598	0.712261	0.999834	0
RLX18384	-0.115437	0.831203	0.999834	0
RLX18400	-0.630361	NA	NA	0
RLX18417	-0.205602	0.725901	0.999834	0
RLX18419	-0.190151	0.635433	0.999834	0
RLX18549	-0.195817	NA	NA	0
RLX18674	0.488772	0.287351	0.999834	0
RLX18695	-0.278391	0.593469	0.999834	0
RLX18702	0.144826	0.699423	0.999834	0
RLX18763	0.111228	0.812228	0.999834	0
RLX18842	0.206282	0.61733	0.999834	0
RLX18872	-0.790526	0.145793	0.999834	0
RLX18939	0.205776	0.681277	0.999834	0
RLX18991	0.104667	0.856989	0.999834	0
RLX18994	0.172674	0.768473	0.999834	0
RLX19006	-0.284442	0.610106	0.999834	0
RLX19135	0.447367	0.340215	0.999834	0
RLX19192	0.693942	0.205359	0.999834	0
RLX19194	0.436341	0.432087	0.999834	0
RLX19274	0.20202	0.697927	0.999834	0
RLX19321	0.188653	0.692967	0.999834	0
RLX19362	0.231697	0.676413	0.999834	0
RLX19419	0.0892277	0.871263	0.999834	0
RLX19513	0.115225	0.764879	0.999834	0
RLX19581	-0.456404	0.293083	0.999834	0
RLX19599	0.41987	0.457806	0.999834	0
RLX19682	0.18888	0.723129	0.999834	0
RLX19688	0.763973	0.17841	0.999834	0
RLX19743	-0.078902	0.878669	0.999834	0
RLX19780	-0.481702	0.412105	0.999834	0
RLX19819	-0.411545	0.483486	0.999834	0
RLX19836	-0.000894892	0.998743	0.999834	0
RLX19878	-0.221914	0.682407	0.999834	0
RLX19882	0.0146029	0.965951	0.999834	0
RLX19896	-0.591228	0.135214	0.999834	0
RLX19940	-0.0435143	0.936106	0.999834	0
RLX20072	-0.585313	0.282419	0.999834	0
RLX20076	0.052513	0.910962	0.999834	0
RLX20081	-0.181601	0.702904	0.999834	0
RLX20089	0.0735661	0.900134	0.999834	0
RLX20139	0.326717	0.478735	0.999834	0
RLX20181	0.149756	0.561693	0.999834	0
RLX20246	0.558878	0.340502	0.999834	0
RLX20281	-0.478285	0.413397	0.999834	0
RLX20321	-0.322695	0.575354	0.999834	0
RLX20347	0.196931	0.665458	0.999834	0
RLX20452	-0.0663977	0.908698	0.999834	0
RLX20461	-0.0917872	0.875937	0.999834	0
RLX20480	0.0244864	0.966765	0.999834	0
RLX20488	-0.416808	0.3871	0.999834	0
RLX20495	-0.0730013	0.849714	0.999834	0
RLX20582	0.00583343	0.99191	0.999834	0
RLX20590	0.382227	0.392322	0.999834	0
RLX20615	-0.666004	0.205977	0.999834	0
RLX20630	-0.0129062	0.964056	0.999834	0
RLX20657	-0.0550869	0.914871	0.999834	0
RLX20661	0.415026	0.453955	0.999834	0
RLX20663	0.16316	0.711356	0.999834	0
RLX20665	0.097291	0.861193	0.999834	0
RLX20822	0.0065281	0.985367	0.999834	0
RLX20831	0.317207	0.560226	0.999834	0
RLX20862	0.27916	0.561939	0.999834	0
RLX20900	0.0703923	0.854828	0.999834	0
RLX20905	-0.0589509	0.917862	0.999834	0
RLX20993	-0.0231016	0.966223	0.999834	0
RLX21003	-0.224362	0.678554	0.999834	0
RLX21181	0.111647	0.843573	0.999834	0
RLX21184	-0.293803	0.615123	0.999834	0
RLX21295	0.0182085	0.975237	0.999834	0
RLX21316	-0.0299542	0.91746	0.999834	0
RLX21340	0.0183003	0.973277	0.999834	0
RLX21404	-0.0154197	0.978248	0.999834	0
RLX21417	0.814619	0.080465	0.999834	0
RLX21565	0.526765	0.362102	0.999834	0
RLX21568	-0.567643	0.317178	0.999834	0
RLX21575	-0.0376967	0.879591	0.999834	0
RLX21642	0.511395	0.134994	0.999834	0
RLX21653	0.357726	0.422945	0.999834	0
RLX21689	0.0890739	0.860718	0.999834	0
RLX21703	0.335398	0.567512	0.999834	0
RLX21706	-0.277959	0.633545	0.999834	0
RLX21747	-0.330666	0.302866	0.999834	0
RLX21805	-0.145182	0.768935	0.999834	0
RLX21842	0.087496	0.881604	0.999834	0
RLX21855	0.102372	0.849705	0.999834	0
RLX21896	-0.206394	0.689408	0.999834	0
RLX21913	0.0958775	0.791097	0.999834	0
RLX21949	0.100404	0.864162	0.999834	0
RLX21960	0.291659	0.570394	0.999834	0
RLX21985	0.0811068	0.888587	0.999834	0
RLX22010	0.327848	0.511953	0.999834	0
RLX22012	-0.0869375	0.878086	0.999834	0
RLX22135	0.549087	0.347635	0.999834	0
RLX22233	0.0512836	0.883077	0.999834	0
RLX22245	-0.930465	NA	NA	0
RLX22250	0.331196	0.531172	0.999834	0
RLX22396	0.0481545	0.928939	0.999834	0
RLX22538	0.0117953	0.98378	0.999834	0
RLX22579	-0.792223	0.143438	0.999834	0
RLX22640	0.1614	0.780991	0.999834	0
RLX22644	-0.226963	0.533619	0.999834	0
RLX22687	0.0932472	0.871489	0.999834	0
RLX22777	-0.47247	0.403053	0.999834	0
RLX22800	0.793457	0.176778	0.999834	0
RLX22806	0.529637	0.366434	0.999834	0
RLX22809	1.38522	0.0180439	0.999834	0
RLX22819	0.841261	0.109049	0.999834	0
RLX22923	0.047983	0.927729	0.999834	0
RLX22928	-0.294091	0.613751	0.999834	0
RLX22937	0.109476	0.844007	0.999834	0
RLX22995	-0.318856	0.154577	0.999834	0
RLX23098	0.661311	0.182769	0.999834	0
RLX23171	0.206847	0.636508	0.999834	0
RLX23194	0.216061	0.709977	0.999834	0
RLX23199	0.149166	0.698371	0.999834	0
RLX23219	0.0164373	0.977564	0.999834	0
RLX23285	-0.0636857	0.839992	0.999834	0
RLX23297	0.172754	0.634991	0.999834	0
RLX23345	0.0330938	0.875145	0.999834	0
RLX23366	-0.10325	0.814111	0.999834	0
RLX23380	-0.259465	0.6402	0.999834	0
RLX23449	0.205783	0.726325	0.999834	0
RLX23467	0.423456	0.469894	0.999834	0
RLX23597	-0.0293277	0.954228	0.999834	0
RLX23613	0.0542875	0.925803	0.999834	0
RLX23638	-0.928117	0.0963417	0.999834	0
RLX23642	-0.178179	0.725755	0.999834	0
RLX23649	-0.38702	0.468712	0.999834	0
RLX23685	0.37524	0.397723	0.999834	0
RLX23700	0.218072	0.664098	0.999834	0
RLX23774	0.326648	0.542299	0.999834	0
RLX23823	0.29654	0.554679	0.999834	0
RLX23844	-0.340676	0.463981	0.999834	0
RLX23939	0.0612598	0.906957	0.999834	0
RLX23959	-0.0826436	0.727518	0.999834	0
RLX24007	-0.419757	0.462159	0.999834	0
RLX24020	-0.0384164	0.942124	0.999834	0
RLX24029	0.304542	0.594552	0.999834	0
RLX24046	-0.451805	0.424614	0.999834	0
RLX24051	0.148167	0.798784	0.999834	0
RLX24057	-0.335214	0.547389	0.999834	0
RLX24075	0.593537	0.311984	0.999834	0
RLX24085	-0.00913252	0.984569	0.999834	0
RLX24113	0.195269	0.736833	0.999834	0
RLX24166	-0.392209	0.165051	0.999834	0
RLX24182	0.928388	0.106205	0.999834	0
RLX24212	0.141616	0.775609	0.999834	0
RLX24261	-0.150859	0.785989	0.999834	0
RLX24269	-0.0548753	0.920365	0.999834	0
RLX24276	0.0515576	0.834002	0.999834	0
RLX24286	-0.22659	0.629131	0.999834	0
RLX24316	0.652178	0.241635	0.999834	0
RLX24382	0.474491	0.415155	0.999834	0
RLX24421	0.0136923	0.961655	0.999834	0
RLX24422	-0.191233	0.709601	0.999834	0
RLX24438	0.221927	0.620423	0.999834	0
RLX24446	0.00511875	0.992951	0.999834	0
RLX24461	0.0116409	0.981695	0.999834	0
RLX24518	0.272584	0.576913	0.999834	0
RLX24554	-0.0225536	0.959704	0.999834	0
RLX24577	-0.143855	0.794544	0.999834	0
RLX24856	0.227252	0.554304	0.999834	0
RLX24906	0.264152	0.634016	0.999834	0
RLX24925	-0.0697714	0.889242	0.999834	0
RLX24991	0.0417042	0.943447	0.999834	0
RLX25075	-0.0398294	0.938553	0.999834	0
RLX25102	-0.371152	0.527466	0.999834	0
RLX25171	0.115382	0.635892	0.999834	0
RLX25185	-0.117418	0.598465	0.999834	0
RLX25199	0.00144739	0.996986	0.999834	0
RLX25200	0.493387	0.376669	0.999834	0
RLX25237	-0.0740543	0.800666	0.999834	0
RLX25254	0.0341521	0.896064	0.999834	0
RLX25269	-0.471217	0.416609	0.999834	0
RLX25306	-0.138737	0.798213	0.999834	0
RLX25324	-0.0402615	0.944491	0.999834	0
RLX25346	-0.338674	0.543302	0.999834	0
RLX25439	-0.317085	0.565577	0.999834	0
RLX25463	-0.278789	0.633988	0.999834	0
RLX25540	-0.206504	0.725227	0.999834	0
RLX25608	-0.248488	0.62581	0.999834	0
RLX25613	0.120404	0.800745	0.999834	0
RLX25628	0.727728	0.140422	0.999834	0
RLX25660	0.0103029	0.985228	0.999834	0
RLX25698	-0.952675	0.0653336	0.999834	0
RLX25700	-0.526213	0.369634	0.999834	0
RLX25706	-0.0374933	0.949139	0.999834	0
RLX25720	0.127707	0.820348	0.999834	0
RLX25742	0.202104	0.649498	0.999834	0
RLX25753	0.104151	0.850589	0.999834	0
RLX25796	0.321056	0.539005	0.999834	0
RLX25798	0.115225	0.764879	0.999834	0
RLX25854	-0.402818	0.352259	0.999834	0
RLX25868	-0.182359	0.748754	0.999834	0
RLX25888	-0.0544718	0.924434	0.999834	0
RLX25921	0.252061	0.667674	0.999834	0
RLX25943	0.155113	0.671733	0.999834	0
RLX25948	0.354484	0.468462	0.999834	0
RLX25949	0.339671	0.502491	0.999834	0
RLX25956	0.0252928	0.965171	0.999834	0
RLX25978	-0.269014	0.611414	0.999834	0
RLX25981	-0.0730273	0.892326	0.999834	0
RLX26009	0.816445	0.102537	0.999834	0
RLX26014	-0.0109226	0.961623	0.999834	0
RLX26020	0.107187	0.846583	0.999834	0
RLX26022	0.420319	0.274198	0.999834	0
RLX26026	-0.159914	0.550414	0.999834	0
RLX26134	-0.134268	0.738146	0.999834	0
RLX26140	0.301981	0.380886	0.999834	0
RLX26142	0.192572	0.743033	0.999834	0
RLX26154	-0.0744148	0.832404	0.999834	0
RLX26161	-0.406083	0.465883	0.999834	0
RLX26264	0.734264	NA	NA	0
RLX26296	0.0234766	0.963801	0.999834	0
RLX26303	0.395095	0.499431	0.999834	0
RLX26307	0.827398	0.151794	0.999834	0
RLX26382	-0.833017	0.106172	0.999834	0
RLX26423	-0.0298909	0.9555	0.999834	0
RLX26428	-0.889364	0.0639271	0.999834	0
RLX26436	0.6148	0.204803	0.999834	0
RLX26472	0.00570832	0.990988	0.999834	0
RLX26473	-0.101975	0.735086	0.999834	0
RLX26567	-0.122057	0.585216	0.999834	0
RLX26597	-0.0158016	0.97011	0.999834	0
RLX26599	0.863538	0.0480113	0.999834	0
RLX26600	-0.214055	0.489011	0.999834	0
RLX26620	0.786772	0.088106	0.999834	0
RLX26673	-0.702504	0.232126	0.999834	0
RLX26680	0.238301	0.679532	0.999834	0
RLX26694	-0.248375	0.612461	0.999834	0
RLX26696	-0.253118	0.558355	0.999834	0
RLX26700	0.978593	NA	NA	0
RLX26707	0.314892	0.429703	0.999834	0
RLX26713	0.0803459	0.801013	0.999834	0
RLX26723	-0.0961006	0.862963	0.999834	0
RLX26780	-0.625754	0.276271	0.999834	0
RLX26783	-0.173289	0.764528	0.999834	0
RLX26819	-0.549587	0.337242	0.999834	0
[truncated: 553 more rows]

## Sheet: S6
Table S6. Comparison of WGS read depth per TE families comparing Bravo BCs to Blanco BCs
Family	log2FC	p.value	p.adj	DE_call
DHH00181	2.38563	1.31163e-49	5.82734e-46	up
RLG02073	2.12816	1.03936e-38	3.46327e-35	up
RLG12523	2.43122	2.12818e-55	1.13462e-51	up
RLG18176	1.53871	7.06479e-20	1.25551e-16	up
RLX23214	2.09886	1.07743e-37	3.19123e-34	up
RLX25450	3.32905	9.55057e-95	1.27295e-90	up
RLX26638	1.61607	9.69426e-21	1.84586e-17	up
RLX27055	2.40187	2.36696e-44	9.01373e-41	up
RLX27424	3.08453	6.43066e-83	5.71407e-79	up
RLX27955	1.75966	4.44399e-28	1.18463e-24	up
RLX29021	1.81563	4.71668e-26	1.14302e-22	up
RLX29022	2.79485	7.39811e-64	4.93028e-60	up
RLX30995	1.61767	2.96363e-21	6.07704e-18	up
RLX30996	3.37586	1.24487e-95	3.31845e-91	up
RLX30997	1.22481	1.4437e-12	2.2638e-09	up
RLX35720	1.7058	1.92269e-24	4.2711e-21	up
RLX28551	1.40315	3.25921e-16	5.43005e-13	up
RLX36102	1.11523	6.8917e-11	1.02062e-07	up
DHH02981	NA	NA	NA	NA
DHH03151	NA	NA	NA	NA
DTH00486	NA	NA	NA	NA
DTH10715	NA	NA	NA	NA
DTM00118	NA	NA	NA	NA
DTT10171	NA	NA	NA	NA
DTT11765	NA	NA	NA	NA
RLX27624	NA	NA	NA	NA
RLX30597	NA	NA	NA	NA
RST00376	NA	NA	NA	NA
RST00488	NA	NA	NA	NA
RST00538	NA	NA	NA	NA
RST00674	NA	NA	NA	NA
RST00703	NA	NA	NA	NA
RST00731	NA	NA	NA	NA
RST00754	NA	NA	NA	NA
RST00771	NA	NA	NA	NA
DHH00001	0.00674245	0.960482	0.999978	0
DHH00002	0.011229	0.933529	0.999978	0
DHH00003	0.0162659	0.902767	0.999978	0
DHH00004	0.00263886	0.98422	0.999978	0
DHH00005	-0.0256802	0.851898	0.999978	0
DHH00006	-0.0335251	0.802999	0.999978	0
DHH00007	-0.0217717	0.871153	0.999978	0
DHH00008	-0.0135056	0.919262	0.999978	0
DHH00009	0.0160505	0.904546	0.999978	0
DHH00010	-0.032889	0.807181	0.999978	0
DHH00011	0.0257029	0.850176	0.999978	0
DHH00012	0.0247822	0.876946	0.999978	0
DHH00013	-0.052381	0.709668	0.999978	0
DHH00014	-0.0137689	0.918895	0.999978	0
DHH00015	-0.0183216	0.893293	0.999978	0
DHH00016	-0.0282235	0.838658	0.999978	0
DHH00017	0.00847914	0.951646	0.999978	0
DHH00018	-0.0243317	0.858028	0.999978	0
DHH00019	0.00662279	0.961565	0.999978	0
DHH00020	0.00177504	0.990048	0.999978	0
DHH00021	-0.0200659	0.883653	0.999978	0
DHH00022	-0.0245568	0.861103	0.999978	0
DHH00023	-0.0332355	0.806778	0.999978	0
DHH00024	0.0608788	0.669639	0.999978	0
DHH00025	0.0103428	0.942086	0.999978	0
DHH00026	0.0506482	0.717343	0.999978	0
DHH00027	-0.102247	0.499303	0.999978	0
DHH00028	0.0114864	0.938031	0.999978	0
DHH00029	-0.0300717	0.825934	0.999978	0
DHH00030	-0.0233055	0.877707	0.999978	0
DHH00031	0.103408	0.516094	0.999978	0
DHH00032	-0.0111024	0.937176	0.999978	0
DHH00033	0.0229928	0.881278	0.999978	0
DHH00034	-0.0307564	0.837504	0.999978	0
DHH00035	-0.0170172	0.918311	0.999978	0
DHH00036	0.00709879	0.959258	0.999978	0
DHH00037	-0.0110264	0.941779	0.999978	0
DHH00038	-0.09233	0.562898	0.999978	0
DHH00039	-0.00285187	0.985185	0.999978	0
DHH00040	0.00267273	0.98555	0.999978	0
DHH00041	-0.0324657	0.823424	0.999978	0
DHH00042	0.066535	0.674316	0.999978	0
DHH00043	0.0524558	0.761713	0.999978	0
DHH00044	0.0402041	0.790154	0.999978	0
DHH00045	0.0428321	0.773348	0.999978	0
DHH00046	-0.060353	0.689873	0.999978	0
DHH00047	0.0137894	0.930831	0.999978	0
DHH00048	0.0148259	0.917097	0.999978	0
DHH00049	0.0404176	0.782084	0.999978	0
DHH00050	0.0474353	0.78095	0.999978	0
DHH00051	0.101217	0.52248	0.999978	0
DHH00052	0.08456	0.598296	0.999978	0
DHH00053	0.0734238	0.671572	0.999978	0
DHH00054	0.0471954	0.755844	0.999978	0
DHH00055	0.0393853	0.816173	0.999978	0
DHH00056	0.0907456	0.593077	0.999978	0
DHH00057	-0.0676736	0.684265	0.999978	0
DHH00058	-0.0247671	0.885387	0.999978	0
DHH00059	0.190078	0.270768	0.999978	0
DHH00062	0.0384221	0.824321	0.999978	0
DHH00063	0.0177663	0.915027	0.999978	0
DHH00065	0.00783012	0.95664	0.999978	0
DHH00067	0.0270283	0.86338	0.999978	0
DHH00068	0.070904	0.657964	0.999978	0
DHH00069	-0.179216	0.294558	0.999978	0
DHH00070	-0.18338	0.259554	0.999978	0
DHH00071	-0.0989278	0.561913	0.999978	0
DHH00072	-0.0717508	0.655884	0.999978	0
DHH00073	-0.049284	0.74276	0.999978	0
DHH00075	-0.181522	0.292722	0.999978	0
DHH00076	0.138617	0.423464	0.999978	0
DHH00077	-0.174266	0.278518	0.999978	0
DHH00078	-0.00627775	0.970664	0.999978	0
DHH00079	-0.0932817	0.571722	0.999978	0
DHH00081	-0.0682156	0.663258	0.999978	0
DHH00082	0.0379324	0.800331	0.999978	0
DHH00083	-0.0224879	0.821395	0.999978	0
DHH00085	-0.0319296	0.843657	0.999978	0
DHH00086	-0.13536	0.431902	0.999978	0
DHH00087	0.0179335	0.874047	0.999978	0
DHH00089	0.0212402	0.901008	0.999978	0
DHH00092	0.109005	0.529187	0.999978	0
DHH00093	0.0184693	0.902565	0.999978	0
DHH00095	0.113076	0.503262	0.999978	0
DHH00096	-0.0836972	0.613855	0.999978	0
DHH00097	-0.00113274	0.994705	0.999978	0
DHH00098	0.0100466	0.952755	0.999978	0
DHH00102	0.0845876	0.598923	0.999978	0
DHH00103	0.0416788	0.577767	0.999978	0
DHH00104	-0.169796	0.262113	0.999978	0
DHH00105	0.0594523	0.727055	0.999978	0
DHH00107	0.03044	0.857142	0.999978	0
DHH00108	-0.167997	0.331213	0.999978	0
DHH00109	-0.0268166	0.876806	0.999978	0
DHH00111	0.0171284	0.905769	0.999978	0
DHH00115	-0.0287031	0.865946	0.999978	0
DHH00116	0.0243113	0.874493	0.999978	0
DHH00117	0.13611	0.428063	0.999978	0
DHH00118	0.0357285	0.818399	0.999978	0
DHH00119	0.111455	0.518347	0.999978	0
DHH00120	0.0822629	0.62197	0.999978	0
DHH00121	0.19084	0.267395	0.999978	0
DHH00122	-0.0286871	0.868415	0.999978	0
DHH00123	0.0182784	0.912403	0.999978	0
DHH00124	0.101224	0.514384	0.999978	0
DHH00125	-0.130544	0.442834	0.999978	0
DHH00126	-0.0576204	0.644654	0.999978	0
DHH00127	-0.0207617	0.90426	0.999978	0
DHH00128	-0.0284195	0.869475	0.999978	0
DHH00129	0.00443569	0.940613	0.999978	0
DHH00130	-0.121552	0.482828	0.999978	0
DHH00132	0.0440516	0.791834	0.999978	0
DHH00134	0.0308519	0.807744	0.999978	0
DHH00136	0.135579	0.421883	0.999978	0
DHH00138	0.138277	0.424318	0.999978	0
DHH00144	0.202035	0.161735	0.999978	0
DHH00145	-0.00401473	0.981268	0.999978	0
DHH00146	-0.0277429	0.858292	0.999978	0
DHH00148	0.0820993	0.631845	0.999978	0
DHH00150	-0.0655534	0.685131	0.999978	0
DHH00152	0.0550756	0.750515	0.999978	0
DHH00153	-0.099046	0.566239	0.999978	0
DHH00154	0.0338592	0.835441	0.999978	0
DHH00156	-0.0395257	0.794021	0.999978	0
DHH00159	-0.0853384	0.621582	0.999978	0
DHH00164	-0.0102976	0.945994	0.999978	0
DHH00165	-0.0864721	0.277887	0.999978	0
DHH00166	0.274868	0.105681	0.999978	0
DHH00167	0.122196	0.29756	0.999978	0
DHH00171	0.00608487	0.971453	0.999978	0
DHH00173	0.0268035	0.876782	0.999978	0
DHH00176	-0.128432	0.457463	0.999978	0
DHH00177	0.0560399	0.741787	0.999978	0
DHH00178	0.0500794	0.771947	0.999978	0
DHH00180	0.043812	0.800257	0.999978	0
DHH00184	0.0674957	0.686596	0.999978	0
DHH00185	-0.129974	0.451926	0.999978	0
DHH00186	-0.163522	0.342948	0.999978	0
DHH00190	-0.0747582	0.575985	0.999978	0
DHH00191	0.0297943	0.832414	0.999978	0
DHH00192	-0.226066	0.12553	0.999978	0
DHH00195	-0.00468081	0.978365	0.999978	0
DHH00196	-0.166595	0.309312	0.999978	0
DHH00201	0.0601228	0.717582	0.999978	0
DHH00202	0.0397211	0.781548	0.999978	0
DHH00203	-0.0151766	0.90904	0.999978	0
DHH00206	0.0810926	0.571021	0.999978	0
DHH00212	0.0848905	0.621695	0.999978	0
DHH00214	0.0571595	0.736898	0.999978	0
DHH00215	0.0310762	0.825608	0.999978	0
DHH00216	0.000918965	0.995729	0.999978	0
DHH00217	0.119496	0.49024	0.999978	0
DHH00218	0.0702043	0.684259	0.999978	0
DHH00219	-0.0443425	0.742577	0.999978	0
DHH00222	-0.0551704	0.748068	0.999978	0
DHH00225	0.038922	0.821377	0.999978	0
DHH00228	-0.0526804	0.613374	0.999978	0
DHH00230	0.220684	0.202519	0.999978	0
DHH00234	-0.0619035	0.71781	0.999978	0
DHH00236	0.237082	0.150857	0.999978	0
DHH00238	0.147816	0.385712	0.999978	0
DHH00242	0.0391382	0.821232	0.999978	0
DHH00245	-0.150177	0.34664	0.999978	0
DHH00252	-0.0862456	0.614714	0.999978	0
DHH00256	-0.0280337	0.799538	0.999978	0
DHH00257	0.15912	0.326217	0.999978	0
DHH00258	0.0277944	0.849586	0.999978	0
DHH00259	-0.0636176	0.668251	0.999978	0
DHH00260	-0.129076	0.456153	0.999978	0
DHH00261	0.0177958	0.814853	0.999978	0
DHH00264	0.148377	0.384301	0.999978	0
DHH00265	-0.0564811	0.726937	0.999978	0
DHH00266	-0.0922544	0.582084	0.999978	0
DHH00268	-0.0146438	0.899547	0.999978	0
DHH00272	-0.0829795	0.627835	0.999978	0
DHH00273	-0.0905188	0.600389	0.999978	0
DHH00277	0.0449874	0.78203	0.999978	0
DHH00278	-0.0175308	0.917989	0.999978	0
DHH00280	-0.21099	0.214411	0.999978	0
DHH00286	0.086951	0.599573	0.999978	0
DHH00289	-0.175614	0.303542	0.999978	0
DHH00290	0.0807791	0.600919	0.999978	0
DHH00291	0.0832864	0.565447	0.999978	0
DHH00292	0.00755509	0.92769	0.999978	0
DHH00293	-0.172567	0.319142	0.999978	0
DHH00295	-0.0754335	0.6624	0.999978	0
DHH00296	0.0675892	0.692096	0.999978	0
DHH00298	-0.109258	0.519541	0.999978	0
DHH00299	-0.162999	0.327683	0.999978	0
DHH00301	0.0690963	0.689657	0.999978	0
DHH00304	-0.138556	0.403838	0.999978	0
DHH00314	-0.0914872	0.592311	0.999978	0
DHH00326	0.057911	0.227044	0.999978	0
DHH00328	-0.00580967	0.96548	0.999978	0
DHH00329	0.00125174	0.967699	0.999978	0
DHH00335	0.073704	0.546662	0.999978	0
DHH00337	0.00761823	0.92563	0.999978	0
DHH00342	0.154606	0.358918	0.999978	0
DHH00343	0.0926717	0.592693	0.999978	0
DHH00344	0.0606516	0.704647	0.999978	0
DHH00345	0.109872	0.508403	0.999978	0
DHH00346	0.00668448	0.812867	0.999978	0
DHH00347	0.061551	0.718707	0.999978	0
DHH00349	0.0413792	0.793931	0.999978	0
DHH00350	0.00965495	0.955172	0.999978	0
DHH00354	0.176832	0.306317	0.999978	0
DHH00357	-0.046863	0.597511	0.999978	0
DHH00361	0.0236282	0.817618	0.999978	0
DHH00362	0.0900939	0.602723	0.999978	0
DHH00364	-0.178846	0.263671	0.999978	0
DHH00369	0.00830668	0.957733	0.999978	0
DHH00371	0.00504631	0.945785	0.999978	0
DHH00374	-0.0388303	0.774798	0.999978	0
DHH00379	-0.0133657	0.935422	0.999978	0
DHH00382	0.202032	0.24334	0.999978	0
DHH00385	0.171918	0.294829	0.999978	0
DHH00390	-0.0326356	0.622869	0.999978	0
DHH00391	0.18558	0.284012	0.999978	0
DHH00393	-0.21321	0.215436	0.999978	0
DHH00394	0.254237	0.130382	0.999978	0
DHH00395	0.109665	0.526218	0.999978	0
DHH00396	-0.014867	0.931589	0.999978	0
DHH00398	-0.109591	0.522394	0.999978	0
DHH00400	0.129481	0.454558	0.999978	0
DHH00404	-0.0628529	0.660824	0.999978	0
DHH00406	-0.00553789	0.96955	0.999978	0
DHH00413	-0.0673476	0.694621	0.999978	0
DHH00418	-0.0215737	0.696322	0.999978	0
DHH00419	-0.0895316	0.500004	0.999978	0
DHH00421	-0.165162	0.322458	0.999978	0
DHH00424	0.0291862	0.806795	0.999978	0
DHH00425	-0.0484156	0.658463	0.999978	0
DHH00427	-0.0317924	0.848873	0.999978	0
DHH00431	0.0951169	0.577468	0.999978	0
DHH00433	0.029358	0.86256	0.999978	0
DHH00439	-0.0729337	0.552146	0.999978	0
DHH00441	0.0389876	0.739269	0.999978	0
DHH00443	-0.0744668	0.655225	0.999978	0
DHH00444	0.0366194	0.816062	0.999978	0
DHH00445	-0.0787765	0.450449	0.999978	0
DHH00446	0.0222526	0.868025	0.999978	0
DHH00450	0.0490957	0.72652	0.999978	0
DHH00451	-0.00702105	0.916907	0.999978	0
DHH00452	-0.206893	0.213024	0.999978	0
DHH00455	-0.100088	0.554106	0.999978	0
DHH00457	0.070004	0.352607	0.999978	0
DHH00458	0.0554613	0.744841	0.999978	0
DHH00459	-0.0149695	0.891655	0.999978	0
DHH00460	0.0347561	0.701907	0.999978	0
DHH00461	0.00887958	0.958336	0.999978	0
DHH00463	0.0979358	0.470171	0.999978	0
DHH00465	-0.11907	0.40517	0.999978	0
DHH00467	-0.101008	0.459374	0.999978	0
DHH00471	0.181776	0.159508	0.999978	0
DHH00472	0.0184678	0.798134	0.999978	0
DHH00482	0.10972	0.517497	0.999978	0
DHH00483	0.161051	0.337102	0.999978	0
DHH00498	0.00930712	0.956927	0.999978	0
DHH00504	0.114594	0.506877	0.999978	0
DHH00509	0.0282485	0.870286	0.999978	0
DHH00511	0.0792135	0.644147	0.999978	0
DHH00513	-0.019554	0.9099	0.999978	0
DHH00520	-0.0221852	0.689224	0.999978	0
DHH00522	0.0740929	0.667967	0.999978	0
DHH00524	0.0804203	0.541026	0.999978	0
DHH00528	-0.0425927	0.650891	0.999978	0
DHH00531	-0.0828675	0.631627	0.999978	0
DHH00537	-0.107798	0.531834	0.999978	0
DHH00545	-0.197814	0.245761	0.999978	0
DHH00547	-0.000875297	0.99596	0.999978	0
DHH00562	-0.101255	0.383387	0.999978	0
DHH00566	-0.0705156	0.683924	0.999978	0
DHH00571	-0.00348079	0.981789	0.999978	0
DHH00574	0.197701	0.251517	0.999978	0
DHH00576	-0.0253167	0.883259	0.999978	0
DHH00579	0.0669138	0.696551	0.999978	0
DHH00582	-0.0250655	0.847078	0.999978	0
DHH00584	0.0086158	0.96032	0.999978	0
DHH00589	0.0488287	0.737534	0.999978	0
DHH00599	-0.026644	0.762215	0.999978	0
DHH00600	-0.0571645	0.740916	0.999978	0
DHH00601	-0.0954036	0.513198	0.999978	0
DHH00604	0.0524454	0.674091	0.999978	0
DHH00606	0.124364	0.472799	0.999978	0
DHH00607	0.0115183	0.802469	0.999978	0
DHH00609	-0.0223641	0.689473	0.999978	0
DHH00622	0.0105948	0.948623	0.999978	0
DHH00626	-0.0238858	0.889955	0.999978	0
DHH00630	0.00403736	0.971486	0.999978	0
DHH00636	0.0911883	0.442463	0.999978	0
DHH00638	-0.0972136	0.566313	0.999978	0
DHH00639	-0.0748873	0.641118	0.999978	0
DHH00644	0.0418923	0.536326	0.999978	0
DHH00653	-0.0563054	0.742069	0.999978	0
DHH00656	0.121088	0.476034	0.999978	0
DHH00657	0.0460081	0.785691	0.999978	0
DHH00661	-0.106404	0.288304	0.999978	0
DHH00669	-0.131965	0.330618	0.999978	0
DHH00670	0.0475876	0.695836	0.999978	0
DHH00682	0.0559374	0.635104	0.999978	0
DHH00688	0.0574325	0.672808	0.999978	0
DHH00702	-0.00882423	0.958732	0.999978	0
DHH00708	0.021806	0.813041	0.999978	0
DHH00718	0.0823541	0.6345	0.999978	0
DHH00732	0.0668322	0.667653	0.999978	0
DHH00743	-0.0762403	0.464642	0.999978	0
DHH00746	0.0242469	0.856905	0.999978	0
DHH00750	0.0621136	0.719527	0.999978	0
DHH00753	0.113279	0.401472	0.999978	0
DHH00754	-0.187266	0.15205	0.999978	0
DHH00766	0.0383248	0.799384	0.999978	0
DHH00779	0.0471999	0.632542	0.999978	0
DHH00783	0.0452668	0.724611	0.999978	0
DHH00786	0.0997976	0.549869	0.999978	0
DHH00795	-0.0315272	0.761098	0.999978	0
DHH00796	0.0213354	0.890416	0.999978	0
DHH00802	-0.045128	0.648232	0.999978	0
DHH00806	0.0645521	0.619316	0.999978	0
DHH00812	-0.0353931	0.813797	0.999978	0
DHH00819	0.0138266	0.930394	0.999978	0
DHH00822	0.0316463	0.843938	0.999978	0
DHH00824	-0.162584	0.285184	0.999978	0
DHH00828	0.0730113	0.670454	0.999978	0
DHH00835	0.128519	0.457788	0.999978	0
DHH00839	0.071041	0.681035	0.999978	0
DHH00843	-0.138487	0.424038	0.999978	0
DHH00854	0.18629	0.278717	0.999978	0
DHH00855	0.104588	0.545315	0.999978	0
DHH00858	0.0600075	0.687028	0.999978	0
DHH00863	-0.0875977	0.501367	0.999978	0
DHH00864	-0.0421545	0.771311	0.999978	0
DHH00868	0.200081	0.220985	0.999978	0
DHH00869	0.112774	0.512215	0.999978	0
DHH00871	-0.0887293	0.577543	0.999978	0
DHH00876	0.0522612	0.762229	0.999978	0
DHH00879	0.191243	0.200948	0.999978	0
DHH00882	0.0483523	0.777295	0.999978	0
DHH00894	-0.0362046	0.642651	0.999978	0
DHH00909	-0.1374	0.425725	0.999978	0
DHH00917	-0.150188	0.385946	0.999978	0
DHH00918	-0.0432395	0.774492	0.999978	0
DHH00924	0.054855	0.569361	0.999978	0
DHH00928	-0.0320075	0.810176	0.999978	0
DHH00929	-0.100733	0.425933	0.999978	0
DHH00931	-0.0145616	0.931238	0.999978	0
DHH00933	-0.0472292	0.607815	0.999978	0
DHH00940	0.0398127	0.81811	0.999978	0
DHH00942	-0.0804777	0.466853	0.999978	0
DHH00946	0.0910014	0.48034	0.999978	0
DHH00952	0.120388	0.483438	0.999978	0
DHH00953	-0.0188568	0.652216	0.999978	0
DHH00957	0.12272	0.476371	0.999978	0
DHH00959	0.0824409	0.615418	0.999978	0
DHH00960	-0.12134	0.424331	0.999978	0
DHH00965	0.0445696	0.782478	0.999978	0
DHH00980	0.0735655	0.669094	0.999978	0
DHH00983	0.0248625	0.826452	0.999978	0
DHH00987	0.0259494	0.815304	0.999978	0
DHH00993	0.10034	0.537291	0.999978	0
DHH00997	0.0121268	0.906305	0.999978	0
DHH00998	-0.110521	0.52327	0.999978	0
DHH01006	0.0694958	0.409504	0.999978	0
DHH01009	0.0669658	0.682861	0.999978	0
DHH01016	-0.0854432	0.621479	0.999978	0
DHH01024	-0.17034	0.26166	0.999978	0
DHH01032	-0.109616	0.472511	0.999978	0
DHH01036	-0.0062094	0.935415	0.999978	0
DHH01039	-0.151478	0.380926	0.999978	0
DHH01040	0.0120574	0.905351	0.999978	0
DHH01041	0.201255	0.133666	0.999978	0
DHH01050	-0.054877	0.62265	0.999978	0
DHH01060	-0.053092	0.693685	0.999978	0
DHH01066	-0.0805834	0.556499	0.999978	0
DHH01068	0.00510636	0.974897	0.999978	0
DHH01080	0.101273	0.558223	0.999978	0
DHH01085	0.0302277	0.857337	0.999978	0
DHH01086	0.223772	0.19412	0.999978	0
DHH01089	0.0353559	0.707895	0.999978	0
DHH01094	-0.120718	0.362277	0.999978	0
DHH01104	0.15468	0.370636	0.999978	0
DHH01107	0.204686	0.237373	0.999978	0
DHH01112	0.133536	0.437996	0.999978	0
DHH01119	0.172283	0.111644	0.999978	0
DHH01120	-0.0294661	0.832226	0.999978	0
DHH01122	-0.0885089	0.566647	0.999978	0
DHH01128	0.0305283	0.63417	0.999978	0
DHH01129	0.0678547	0.531258	0.999978	0
DHH01130	0.0863527	0.603562	0.999978	0
DHH01134	0.212088	0.219186	0.999978	0
DHH01154	0.104787	0.502073	0.999978	0
DHH01158	-0.0554936	0.748714	0.999978	0
DHH01164	0.109396	0.408958	0.999978	0
DHH01173	0.109751	0.360726	0.999978	0
DHH01188	0.0567676	0.717214	0.999978	0
DHH01191	0.102125	0.551775	0.999978	0
DHH01195	0.0051186	0.976426	0.999978	0
DHH01196	0.179532	0.296286	0.999978	0
DHH01197	0.073577	0.669647	0.999978	0
DHH01206	0.00223657	0.969669	0.999978	0
DHH01209	0.0906019	0.391424	0.999978	0
DHH01219	0.0355152	0.797798	0.999978	0
DHH01220	0.0741472	0.600316	0.999978	0
DHH01226	0.116783	0.402247	0.999978	0
DHH01234	0.128869	0.456797	0.999978	0
DHH01240	0.0307652	0.858943	0.999978	0
DHH01249	-0.0981074	0.343525	0.999978	0
DHH01254	-0.0388517	0.648262	0.999978	0
DHH01255	-0.0839228	0.599321	0.999978	0
DHH01256	-0.006756	0.96717	0.999978	0
DHH01260	0.0967831	0.556736	0.999978	0
DHH01262	0.146035	0.377992	0.999978	0
DHH01264	0.222321	0.188779	0.999978	0
DHH01280	-0.020444	0.906058	0.999978	0
DHH01284	0.141505	0.413773	0.999978	0
DHH01286	0.0295955	0.722723	0.999978	0
DHH01288	0.0923877	0.396855	0.999978	0
DHH01291	0.15158	0.371577	0.999978	0
DHH01296	0.234163	0.172723	0.999978	0
DHH01303	0.160192	0.342326	0.999978	0
DHH01304	0.0206688	0.846012	0.999978	0
DHH01309	0.0228262	0.827222	0.999978	0
DHH01312	0.0997573	0.564674	0.999978	0
DHH01318	-0.018708	0.90544	0.999978	0
DHH01323	-0.0352956	0.838557	0.999978	0
DHH01324	-0.0278584	0.800998	0.999978	0
DHH01328	-0.0406651	0.747663	0.999978	0
DHH01329	-0.00705052	0.965728	0.999978	0
DHH01334	-0.0122378	0.934633	0.999978	0
DHH01342	-0.105197	0.480178	0.999978	0
DHH01348	0.00233288	0.987758	0.999978	0
DHH01350	-0.118325	0.306492	0.999978	0
DHH01351	-0.155325	0.361012	0.999978	0
DHH01357	0.0319643	0.694987	0.999978	0
DHH01358	0.0298717	0.838171	0.999978	0
DHH01360	0.110899	0.475645	0.999978	0
DHH01361	0.0123667	0.923033	0.999978	0
DHH01386	0.0891947	0.606315	0.999978	0
DHH01392	0.0505983	0.762927	0.999978	0
DHH01402	-0.0521913	0.497095	0.999978	0
DHH01406	0.110998	0.466193	0.999978	0
DHH01410	-0.0377221	0.806793	0.999978	0
DHH01411	0.205521	0.143653	0.999978	0
DHH01413	0.0827128	0.56965	0.999978	0
DHH01414	0.059504	0.593645	0.999978	0
DHH01415	-0.0256037	0.859374	0.999978	0
DHH01422	0.0424401	0.62405	0.999978	0
DHH01430	-0.0539121	0.714248	0.999978	0
DHH01432	-0.092595	0.532194	0.999978	0
DHH01434	-0.0670293	0.633446	0.999978	0
DHH01442	-0.0277512	0.872701	0.999978	0
DHH01444	0.186288	0.275501	0.999978	0
DHH01447	0.0172438	0.879097	0.999978	0
DHH01450	0.216154	0.211873	0.999978	0
DHH01453	0.0787353	0.649475	0.999978	0
DHH01455	0.0175383	0.769965	0.999978	0
DHH01460	-0.0446582	0.789303	0.999978	0
DHH01467	0.0760635	0.612593	0.999978	0
DHH01472	-0.0735495	0.666823	0.999978	0
DHH01478	-0.0638659	0.708864	0.999978	0
DHH01479	-0.0535387	0.757282	0.999978	0
DHH01480	-0.0589602	0.730613	0.999978	0
DHH01489	0.0218799	0.885692	0.999978	0
DHH01517	-0.00612177	0.971702	0.999978	0
DHH01519	-0.0470205	0.772498	0.999978	0
DHH01531	-0.000979297	0.995456	0.999978	0
DHH01535	0.0643404	0.70595	0.999978	0
DHH01541	0.0868564	0.558366	0.999978	0
DHH01547	-0.0174724	0.798574	0.999978	0
DHH01550	-0.0745642	0.646545	0.999978	0
DHH01558	0.00110719	0.991153	0.999978	0
DHH01564	0.00356395	0.983464	0.999978	0
DHH01565	-0.0119991	0.944637	0.999978	0
DHH01570	-0.0686243	0.684304	0.999978	0
DHH01572	-0.0406882	0.795971	0.999978	0
DHH01585	-0.0932567	0.590313	0.999978	0
DHH01588	0.0528651	0.566776	0.999978	0
DHH01601	0.114606	0.507813	0.999978	0
DHH01611	0.0969629	0.574538	0.999978	0
DHH01616	0.0395869	0.755113	0.999978	0
DHH01617	-0.0328192	0.849738	0.999978	0
DHH01620	-0.0472292	0.607815	0.999978	0
DHH01622	-0.0663088	0.505289	0.999978	0
DHH01624	-0.080928	0.524422	0.999978	0
DHH01626	0.0485316	0.671044	0.999978	0
DHH01633	0.0437968	0.799464	0.999978	0
DHH01635	0.0154566	0.906857	0.999978	0
DHH01639	-0.163648	0.12015	0.999978	0
DHH01640	0.0348118	0.75884	0.999978	0
DHH01648	0.114689	0.384575	0.999978	0
DHH01652	-0.0510883	0.539453	0.999978	0
DHH01658	0.121738	0.481975	0.999978	0
DHH01659	0.0110625	0.948614	0.999978	0
DHH01664	0.0120898	0.898288	0.999978	0
DHH01674	-0.0548534	0.749064	0.999978	0
DHH01688	0.0433511	0.60437	0.999978	0
DHH01690	-0.103189	0.518976	0.999978	0
DHH01698	-0.0920792	0.593463	0.999978	0
DHH01717	-0.183801	0.249799	0.999978	0
DHH01725	0.0785053	0.649799	0.999978	0
DHH01729	-0.0204902	0.888159	0.999978	0
DHH01735	0.066142	0.690689	0.999978	0
DHH01738	0.0337799	0.845394	0.999978	0
DHH01751	0.00339319	0.984359	0.999978	0
DHH01756	-0.0230151	0.866891	0.999978	0
DHH01761	-0.140222	0.41521	0.999978	0
DHH01762	0.0554029	0.746219	0.999978	0
DHH01763	-0.0476108	0.582394	0.999978	0
DHH01767	0.19373	0.250608	0.999978	0
DHH01773	0.0351365	0.838129	0.999978	0
DHH01775	-0.0274667	0.743177	0.999978	0
DHH01780	0.0840751	0.518336	0.999978	0
DHH01784	-0.0267092	0.870278	0.999978	0
DHH01792	0.155157	0.369254	0.999978	0
DHH01802	0.110625	0.507209	0.999978	0
DHH01817	-0.0649649	0.697645	0.999978	0
DHH01829	0.0203676	0.896113	0.999978	0
DHH01831	0.0458183	0.730562	0.999978	0
DHH01835	-0.109611	0.520633	0.999978	0
DHH01843	-0.051679	0.755239	0.999978	0
DHH01846	-0.0465934	0.686031	0.999978	0
DHH01847	0.14956	0.199219	0.999978	0
DHH01853	-0.0120406	0.901236	0.999978	0
DHH01859	-0.0438847	0.777736	0.999978	0
DHH01862	-0.0483012	0.707954	0.999978	0
DHH01867	-0.0522725	0.415401	0.999978	0
DHH01869	-0.0503959	0.766928	0.999978	0
DHH01883	0.113538	0.462936	0.999978	0
DHH01904	0.163348	0.343102	0.999978	0
DHH01906	0.0477453	0.653808	0.999978	0
DHH01925	0.0134234	0.886697	0.999978	0
DHH01944	-0.109357	0.527055	0.999978	0
DHH01946	0.0185101	0.892058	0.999978	0
DHH01948	-0.064498	0.70182	0.999978	0
DHH01951	-0.0742439	0.481202	0.999978	0
DHH01952	-0.0463163	0.771358	0.999978	0
DHH01954	-0.128916	0.4567	0.999978	0
DHH01963	0.0982423	0.520717	0.999978	0
DHH01971	-0.154592	0.36085	0.999978	0
DHH01978	0.0933849	0.313175	0.999978	0
DHH01997	-0.124612	0.462568	0.999978	0
DHH01999	0.00757235	0.94469	0.999978	0
DHH02002	-0.181384	0.207884	0.999978	0
DHH02006	-0.132574	0.442287	0.999978	0
DHH02010	-0.121451	0.482206	0.999978	0
DHH02013	-0.0786396	0.587624	0.999978	0
DHH02017	0.00599701	0.958161	0.999978	0
DHH02019	-0.0381848	0.817702	0.999978	0
DHH02022	-0.0260971	0.766837	0.999978	0
DHH02024	0.165776	0.225457	0.999978	0
DHH02025	0.0288112	0.867408	0.999978	0
DHH02031	0.0551295	0.681439	0.999978	0
DHH02033	-0.00560905	0.967948	0.999978	0
DHH02034	-0.0496915	0.771674	0.999978	0
DHH02038	0.0110933	0.945514	0.999978	0
DHH02047	0.0257188	0.878998	0.999978	0
DHH02051	-0.085997	0.617278	0.999978	0
DHH02055	-0.00959594	0.918351	0.999978	0
DHH02064	-0.0526557	0.760095	0.999978	0
DHH02074	0.0361746	0.768269	0.999978	0
DHH02077	0.00240715	0.988553	0.999978	0
DHH02083	0.0195546	0.870114	0.999978	0
DHH02084	-0.125343	0.390284	0.999978	0
DHH02094	-0.13446	0.316672	0.999978	0
DHH02096	-0.00300581	0.986126	0.999978	0
DHH02098	-0.0451238	0.791875	0.999978	0
DHH02102	0.0220198	0.89831	0.999978	0
DHH02108	-0.0554351	0.748701	0.999978	0
DHH02113	-0.160074	0.354661	0.999978	0
DHH02117	-0.0531527	0.586181	0.999978	0
DHH02119	-0.11794	0.38445	0.999978	0
DHH02122	-0.108115	0.53257	0.999978	0
DHH02126	-0.103973	0.467415	0.999978	0
DHH02128	-0.0108552	0.950035	0.999978	0
DHH02135	0.0230529	0.832986	0.999978	0
DHH02139	0.0216309	0.872585	0.999978	0
DHH02153	-0.0776267	0.653352	0.999978	0
DHH02154	0.0185711	0.913973	0.999978	0
DHH02158	-0.151934	0.369978	0.999978	0
DHH02159	-0.0819967	0.334532	0.999978	0
DHH02162	0.0435418	0.631147	0.999978	0
DHH02170	-0.0738091	0.656754	0.999978	0
DHH02172	0.072107	0.538593	0.999978	0
DHH02185	-0.0981881	0.453449	0.999978	0
DHH02201	0.0158247	0.879103	0.999978	0
DHH02204	0.0385899	0.808869	0.999978	0
DHH02205	0.0399135	0.747715	0.999978	0
DHH02213	-0.0491504	0.776577	0.999978	0
DHH02216	0.0337906	0.839956	0.999978	0
DHH02224	-0.12028	0.476269	0.999978	0
DHH02237	0.0125776	0.941961	0.999978	0
DHH02239	-0.127193	0.436885	0.999978	0
DHH02241	-0.128482	0.3231	0.999978	0
DHH02242	-0.0282242	0.820641	0.999978	0
DHH02246	-0.151914	0.376135	0.999978	0
DHH02250	0.115597	0.348921	0.999978	0
DHH02251	-0.175795	0.293915	0.999978	0
DHH02254	-0.0363622	0.829791	0.999978	0
DHH02260	-0.028069	0.720452	0.999978	0
DHH02261	0.0377627	0.823866	0.999978	0
DHH02268	0.0707603	0.533334	0.999978	0
DHH02272	-0.0590311	0.730288	0.999978	0
DHH02280	-0.115725	0.418981	0.999978	0
DHH02282	-0.0225511	0.895665	0.999978	0
DHH02283	0.0127433	0.902954	0.999978	0
DHH02285	0.0178488	0.897324	0.999978	0
DHH02291	-0.102795	0.550885	0.999978	0
DHH02301	-0.0435501	0.772782	0.999978	0
DHH02302	-0.0195506	0.889258	0.999978	0
DHH02306	-0.0512608	0.705083	0.999978	0
DHH02315	-0.0600129	0.711972	0.999978	0
DHH02325	-0.0639489	0.711256	0.999978	0
DHH02326	-0.00422626	0.979557	0.999978	0
DHH02350	0.100928	0.491058	0.999978	0
DHH02355	0.00796658	0.946279	0.999978	0
DHH02359	-0.198461	0.240938	0.999978	0
DHH02361	0.0947874	0.58318	0.999978	0
DHH02363	0.00973143	0.948798	0.999978	0
DHH02369	-0.0268517	0.758322	0.999978	0
DHH02371	-0.0622725	0.701988	0.999978	0
DHH02378	0.0558886	0.745475	0.999978	0
DHH02379	-0.0203798	0.901292	0.999978	0
DHH02380	0.0385373	0.816836	0.999978	0
DHH02382	0.0299047	0.857242	0.999978	0
DHH02391	0.0715769	0.670839	0.999978	0
DHH02395	0.0248047	0.86905	0.999978	0
DHH02400	-0.0296274	0.837714	0.999978	0
DHH02401	-0.0706227	0.681459	0.999978	0
DHH02409	0.120508	0.402254	0.999978	0
DHH02410	-0.0642496	0.334441	0.999978	0
DHH02411	-0.00593483	0.958481	0.999978	0
DHH02412	0.0834509	0.624243	0.999978	0
DHH02415	0.0479866	0.764025	0.999978	0
DHH02419	0.188342	0.275167	0.999978	0
DHH02422	-0.0974664	0.573183	0.999978	0
DHH02425	-0.0306204	0.758692	0.999978	0
DHH02429	0.138006	0.319823	0.999978	0
DHH02434	0.134335	0.431653	0.999978	0
DHH02439	-0.073078	0.659952	0.999978	0
DHH02441	-0.0735706	0.66338	0.999978	0
DHH02444	-0.0388517	0.648262	0.999978	0
DHH02448	-0.0352429	0.83879	0.999978	0
DHH02451	0.0578315	0.736147	0.999978	0
DHH02453	0.0353421	0.803931	0.999978	0
DHH02460	0.0398803	0.817244	0.999978	0
DHH02461	-0.241227	0.119092	0.999978	0
DHH02467	-0.156573	0.36596	0.999978	0
DHH02468	0.045554	0.617857	0.999978	0
DHH02473	0.0621672	0.69423	0.999978	0
DHH02474	0.0248634	0.855989	0.999978	0
DHH02485	-0.0318632	0.794692	0.999978	0
DHH02486	-0.00349438	0.982737	0.999978	0
DHH02499	-0.145138	0.357387	0.999978	0
DHH02515	0.0175521	0.82989	0.999978	0
DHH02516	0.126709	0.417131	0.999978	0
DHH02525	0.0257761	0.862483	0.999978	0
DHH02528	-0.0238329	0.804178	0.999978	0
DHH02532	0.0750731	0.664758	0.999978	0
DHH02535	-0.162312	0.348328	0.999978	0
DHH02536	0.124287	0.409815	0.999978	0
DHH02538	-0.106637	0.533137	0.999978	0
DHH02540	-0.150722	0.310258	0.999978	0
DHH02541	0.00726842	0.931722	0.999978	0
DHH02543	0.0117127	0.94562	0.999978	0
DHH02547	0.0342201	0.842823	0.999978	0
DHH02550	0.196088	0.244651	0.999978	0
DHH02581	0.0556833	0.641323	0.999978	0
DHH02585	0.0392872	0.819286	0.999978	0
DHH02588	-0.00828018	0.955903	0.999978	0
DHH02594	-0.125699	0.302311	0.999978	0
DHH02595	0.0341055	0.424538	0.999978	0
DHH02609	-0.0213267	0.688743	0.999978	0
DHH02614	0.11323	0.499276	0.999978	0
DHH02617	0.0912098	0.594434	0.999978	0
DHH02619	-0.10491	0.46638	0.999978	0
DHH02632	0.0175383	0.769965	0.999978	0
DHH02642	0.132874	0.281767	0.999978	0
DHH02643	0.00998594	0.951077	0.999978	0
DHH02645	-0.0853762	0.432426	0.999978	0
DHH02647	-0.0544959	0.691505	0.999978	0
DHH02651	-0.130403	0.364664	0.999978	0
DHH02656	-0.000130643	0.999396	0.999978	0
DHH02662	-0.0446032	0.740669	0.999978	0
DHH02664	0.0590589	0.731602	0.999978	0
DHH02674	0.228999	0.180928	0.999978	0
DHH02676	0.00392939	0.950443	0.999978	0
DHH02679	-0.040512	0.770628	0.999978	0
DHH02680	0.132714	0.380011	0.999978	0
DHH02690	-0.00874757	0.959552	0.999978	0
DHH02696	-0.034807	0.720333	0.999978	0
DHH02703	0.0138351	0.93101	0.999978	0
DHH02710	-0.00546819	0.96812	0.999978	0
DHH02711	-0.0351976	0.798394	0.999978	0
DHH02712	0.0255949	0.856271	0.999978	0
DHH02713	0.0318912	0.847909	0.999978	0
DHH02714	-0.132334	0.412122	0.999978	0
DHH02715	-0.0117332	0.941502	0.999978	0
DHH02716	-0.0177951	0.915846	0.999978	0
DHH02717	-0.1186	0.48452	0.999978	0
DHH02718	-0.0241707	0.880979	0.999978	0
DHH02719	0.0296382	0.83544	0.999978	0
DHH02720	-0.0974341	0.572758	0.999978	0
DHH02721	-0.165577	0.290939	0.999978	0
DHH02722	0.127349	0.460108	0.999978	0
DHH02723	-0.255223	0.120059	0.999978	0
DHH02724	-0.00210149	0.990309	0.999978	0
DHH02725	-0.0851166	0.607471	0.999978	0
DHH02726	0.111633	0.519301	0.999978	0
DHH02727	-0.0241298	0.889099	0.999978	0
DHH02728	-0.134684	0.394156	0.999978	0
DHH02729	0.0210932	0.89738	0.999978	0
DHH02730	0.0197564	0.892994	0.999978	0
DHH02731	0.0150174	0.930897	0.999978	0
DHH02732	0.0482223	0.659459	0.999978	0
DHH02733	-0.0488554	0.754296	0.999978	0
DHH02734	0.163372	0.343653	0.999978	0
DHH02735	-0.226569	0.190692	0.999978	0
DHH02736	-0.0923083	0.51329	0.999978	0
DHH02737	0.0133601	0.93805	0.999978	0
DHH02739	0.0873366	0.588898	0.999978	0
DHH02742	0.126471	0.460761	0.999978	0
DHH02743	0.122474	0.403559	0.999978	0
DHH02744	0.0403093	0.815896	0.999978	0
DHH02745	-0.124234	0.370759	0.999978	0
DHH02746	-0.215699	0.182543	0.999978	0
DHH02747	-0.117038	0.496126	0.999978	0
DHH02750	-0.0599353	0.720441	0.999978	0
DHH02751	-0.008928	0.957684	0.999978	0
DHH02752	-0.143251	0.407063	0.999978	0
DHH02753	-0.0836845	0.595796	0.999978	0
DHH02754	-0.0180659	0.899539	0.999978	0
DHH02755	0.286991	0.0955568	0.999978	0
DHH02756	0.02728	0.874536	0.999978	0
DHH02757	0.0954136	0.57901	0.999978	0
DHH02758	0.0384937	0.818745	0.999978	0
DHH02759	0.00587495	0.966033	0.999978	0
DHH02760	-0.150786	0.27735	0.999978	0
DHH02761	-0.0285495	0.862767	0.999978	0
DHH02762	0.0727746	0.673366	0.999978	0
DHH02763	-0.0550935	0.747117	0.999978	0
DHH02764	0.018414	0.915188	0.999978	0
DHH02765	0.0552258	0.746095	0.999978	0
DHH02768	-0.0296931	0.831836	0.999978	0
DHH02770	-0.0080532	0.962922	0.999978	0
DHH02771	0.0975952	0.565905	0.999978	0
DHH02772	-0.019193	0.90844	0.999978	0
DHH02773	-0.0557256	0.724173	0.999978	0
DHH02774	0.0746451	0.600787	0.999978	0
DHH02776	-0.0515371	0.763651	0.999978	0
DHH02777	-0.0470266	0.68691	0.999978	0
DHH02778	0.0719641	0.667086	0.999978	0
DHH02779	-0.0962133	0.575318	0.999978	0
DHH02780	-0.0448118	0.794025	0.999978	0
DHH02781	-0.173084	0.293188	0.999978	0
DHH02782	0.0435	0.519681	0.999978	0
DHH02783	-0.119283	0.46893	0.999978	0
DHH02784	-0.0578279	0.736298	0.999978	0
DHH02785	-0.151865	0.376249	0.999978	0
DHH02786	-0.140744	0.413604	0.999978	0
DHH02787	-0.0517698	0.672105	0.999978	0
DHH02788	-0.068861	0.533651	0.999978	0
DHH02789	0.0121918	0.942293	0.999978	0
DHH02790	0.138344	0.424272	0.999978	0
DHH02791	0.0776762	0.636265	0.999978	0
DHH02793	-0.0748424	0.654804	0.999978	0
DHH02794	-0.143412	0.286426	0.999978	0
DHH02795	-0.206743	0.0910266	0.999978	0
DHH02797	0.000115765	0.999448	0.999978	0
DHH02798	0.00315173	0.982546	0.999978	0
DHH02800	0.0744089	0.664054	0.999978	0
DHH02802	0.126719	0.413076	0.999978	0
DHH02803	-0.119111	0.481254	0.999978	0
DHH02806	-0.0340379	0.842185	0.999978	0
DHH02807	0.214186	0.215421	0.999978	0
DHH02808	-0.152387	0.333133	0.999978	0
DHH02809	0.0699362	0.686432	0.999978	0
DHH02810	0.117706	0.455525	0.999978	0
DHH02811	0.0201836	0.90714	0.999978	0
DHH02812	0.0884195	0.573315	0.999978	0
DHH02813	-0.0461808	0.787288	0.999978	0
DHH02815	-0.0554872	0.708409	0.999978	0
DHH02816	0.0372897	0.794025	0.999978	0
DHH02817	-0.137171	0.356782	0.999978	0
DHH02818	-0.0637467	0.681135	0.999978	0
DHH02820	0.0320232	0.853039	0.999978	0
DHH02821	0.0284761	0.609588	0.999978	0
DHH02822	0.058765	0.574122	0.999978	0
DHH02824	-0.0165975	0.89417	0.999978	0
DHH02826	0.0445966	0.779852	0.999978	0
DHH02831	-0.111344	0.406236	0.999978	0
DHH02832	-0.00205227	0.986109	0.999978	0
DHH02833	-0.10143	0.505372	0.999978	0
DHH02835	0.0508539	0.652222	0.999978	0
DHH02836	0.0902663	0.596518	0.999978	0
DHH02837	-0.0279828	0.86681	0.999978	0
DHH02838	0.0744945	0.656131	0.999978	0
DHH02839	-0.00107732	0.994235	0.999978	0
DHH02840	0.0249488	0.884829	0.999978	0
DHH02841	0.0953363	0.574799	0.999978	0
DHH02843	-0.0604369	0.727128	0.999978	0
DHH02844	0.190952	0.247372	0.999978	0
DHH02847	-0.057991	0.606288	0.999978	0
DHH02849	-0.0450636	0.7287	0.999978	0
DHH02853	0.202652	0.241646	0.999978	0
DHH02854	-0.0856038	0.614381	0.999978	0
DHH02855	-0.059094	0.718324	0.999978	0
DHH02856	-0.148191	0.392225	0.999978	0
DHH02857	0.0727433	0.668184	0.999978	0
DHH02859	-0.0418958	0.804219	0.999978	0
DHH02860	0.180196	0.294123	0.999978	0
DHH02861	0.0545128	0.749239	0.999978	0
DHH02862	-0.0220566	0.897627	0.999978	0
DHH02864	-0.0453544	0.767481	0.999978	0
DHH02866	0.197158	0.2148	0.999978	0
DHH02867	-0.012659	0.93014	0.999978	0
DHH02868	0.194714	0.25946	0.999978	0
DHH02869	0.0477576	0.526173	0.999978	0
DHH02870	0.0699878	0.685304	0.999978	0
DHH02872	-0.213988	0.208179	0.999978	0
DHH02873	0.0344162	0.842518	0.999978	0
DHH02874	-0.0347079	0.819334	0.999978	0
DHH02876	0.0229971	0.885632	0.999978	0
DHH02877	0.0155778	0.909498	0.999978	0
DHH02878	-0.00410147	0.980029	0.999978	0
DHH02879	0.0551555	0.730194	0.999978	0
DHH02880	0.0778324	0.650584	0.999978	0
DHH02881	0.106979	0.532706	0.999978	0
DHH02884	0.122796	0.478036	0.999978	0
DHH02885	-0.0802503	0.63924	0.999978	0
DHH02886	-0.00921584	0.94634	0.999978	0
DHH02890	-0.0859794	0.581405	0.999978	0
DHH02891	-0.0450705	0.792698	0.999978	0
DHH02892	0.0060664	0.971992	0.999978	0
DHH02894	-0.0472015	0.776106	0.999978	0
DHH02896	-0.110855	0.521177	0.999978	0
DHH02897	-0.057199	0.716792	0.999978	0
DHH02898	-0.00476297	0.966979	0.999978	0
DHH02899	-0.0258948	0.841688	0.999978	0
DHH02900	-0.124586	0.268946	0.999978	0
DHH02901	-0.0473389	0.769993	0.999978	0
DHH02902	-0.0104369	0.917848	0.999978	0
DHH02903	0.00658246	0.96837	0.999978	0
DHH02905	-0.0300909	0.85681	0.999978	0
DHH02906	0.156566	0.349586	0.999978	0
DHH02908	-0.099134	0.566844	0.999978	0
DHH02909	0.00444729	0.979426	0.999978	0
DHH02912	-0.122093	0.478305	0.999978	0
DHH02913	-0.0880423	0.459197	0.999978	0
DHH02914	0.0920638	0.593797	0.999978	0
DHH02916	0.0449533	0.792516	0.999978	0
DHH02917	-0.0627562	0.716807	0.999978	0
DHH02918	0.0651553	0.672834	0.999978	0
DHH02919	0.116485	0.47625	0.999978	0
DHH02920	-0.077323	0.638813	0.999978	0
DHH02921	-0.0103982	0.94007	0.999978	0
DHH02922	0.112954	0.513458	0.999978	0
DHH02924	0.0540215	0.635555	0.999978	0
DHH02925	-0.129942	0.163117	0.999978	0
DHH02926	0.0516909	0.76281	0.999978	0
DHH02928	0.0204646	0.90596	0.999978	0
DHH02929	0.115262	0.472397	0.999978	0
DHH02930	-0.0431497	0.795548	0.999978	0
DHH02931	0.0577877	0.729712	0.999978	0
DHH02932	0.0935004	0.462909	0.999978	0
DHH02936	-0.0916994	0.536697	0.999978	0
DHH02937	0.058913	0.729085	0.999978	0
DHH02939	0.104735	0.510018	0.999978	0
DHH02941	-0.0789326	0.648159	0.999978	0
DHH02942	0.0146221	0.932446	0.999978	0
DHH02943	0.0209021	0.903422	0.999978	0
DHH02944	-0.0177078	0.913147	0.999978	0
DHH02946	-0.0666394	0.650064	0.999978	0
DHH02948	-0.00597195	0.971873	0.999978	0
DHH02949	-0.174658	0.313289	0.999978	0
DHH02951	0.00854912	0.946504	0.999978	0
DHH02952	-0.151333	0.379813	0.999978	0
DHH02953	0.0347611	0.765786	0.999978	0
DHH02954	-0.0527722	0.760182	0.999978	0
DHH02955	0.197632	0.176865	0.999978	0
DHH02957	0.00170679	0.991884	0.999978	0
DHH02958	-0.0318205	0.847967	0.999978	0
DHH02959	0.00500708	0.9764	0.999978	0
DHH02961	0.0534567	0.756703	0.999978	0
DHH02963	-0.0585467	0.732791	0.999978	0
DHH02968	0.0675259	0.69207	0.999978	0
DHH02969	-0.0281791	0.855809	0.999978	0
DHH02970	-0.00942471	0.955732	0.999978	0
DHH02971	0.0439115	0.792848	0.999978	0
DHH02973	0.244777	0.15653	0.999978	0
DHH02976	0.0395695	0.760461	0.999978	0
DHH02977	0.0726957	0.592594	0.999978	0
DHH02982	0.00940925	0.950742	0.999978	0
DHH02983	0.0976998	0.544794	0.999978	0
DHH02985	0.00956812	0.954854	0.999978	0
DHH02987	0.0518598	0.762723	0.999978	0
DHH02989	-0.0704825	0.682208	0.999978	0
DHH02992	-0.0120498	0.943479	0.999978	0
DHH02993	-0.064344	0.70923	0.999978	0
DHH02994	0.0696236	0.667367	0.999978	0
DHH02995	-0.0265577	0.877016	0.999978	0
DHH02996	0.0418856	0.739926	0.999978	0
DHH02997	-0.179613	0.230547	0.999978	0
DHH02999	-0.137281	0.399576	0.999978	0
DHH03001	0.016529	0.918101	0.999978	0
DHH03002	0.0364561	0.756667	0.999978	0
DHH03004	0.0811513	0.543255	0.999978	0
DHH03005	-0.0530697	0.739757	0.999978	0
DHH03006	-0.150452	0.380442	0.999978	0
DHH03007	-0.0364346	0.781865	0.999978	0
DHH03010	-0.0232406	0.843566	0.999978	0
DHH03015	0.0473057	0.755011	0.999978	0
DHH03017	-0.0859668	0.619573	0.999978	0
DHH03018	0.0246145	0.886721	0.999978	0
DHH03019	0.0253503	0.869928	0.999978	0
DHH03020	0.03654	0.827883	0.999978	0
DHH03021	-0.0343687	0.564987	0.999978	0
DHH03024	0.0603044	0.718493	0.999978	0
DHH03025	-0.0308588	0.77758	0.999978	0
DHH03026	0.140543	0.375935	0.999978	0
DHH03027	-0.108875	0.522682	0.999978	0
DHH03029	0.366357	0.0344369	0.999978	0
DHH03030	-0.0523178	0.759984	0.999978	0
DHH03031	0.0797813	0.602767	0.999978	0
DHH03033	-0.117817	0.493725	0.999978	0
DHH03036	0.0167937	0.815329	0.999978	0
DHH03038	-0.041295	0.811109	0.999978	0
DHH03039	0.102663	0.542093	0.999978	0
DHH03042	-0.0309183	0.857861	0.999978	0
DHH03044	-0.20843	0.228133	0.999978	0
DHH03045	0.0901871	0.600594	0.999978	0
DHH03046	0.000238391	0.998901	0.999978	0
DHH03047	-0.114046	0.461839	0.999978	0
DHH03049	0.00819228	0.952436	0.999978	0
DHH03050	0.0242942	0.887958	0.999978	0
DHH03051	0.0129375	0.940428	0.999978	0
DHH03053	-0.20951	0.222368	0.999978	0
DHH03054	0.0422006	0.799719	0.999978	0
DHH03056	-0.0257009	0.881911	0.999978	0
DHH03057	0.0334608	0.828157	0.999978	0
DHH03060	0.0322328	0.845036	0.999978	0
DHH03061	-0.0120692	0.940917	0.999978	0
DHH03063	-0.0230916	0.848773	0.999978	0
DHH03064	0.15906	0.347605	0.999978	0
DHH03066	0.0175383	0.769965	0.999978	0
DHH03068	0.0765109	0.608266	0.999978	0
DHH03069	-0.10454	0.46149	0.999978	0
DHH03070	0.170475	0.318778	0.999978	0
DHH03071	-0.0977003	0.56943	0.999978	0
DHH03074	-0.0628517	0.696349	0.999978	0
DHH03076	0.139847	0.419291	0.999978	0
DHH03077	0.0468676	0.731345	0.999978	0
DHH03079	-0.0089405	0.809894	0.999978	0
DHH03080	0.0885899	0.576813	0.999978	0
DHH03081	0.0209933	0.804236	0.999978	0
DHH03082	-0.0855763	0.538028	0.999978	0
DHH03083	-0.0497411	0.77297	0.999978	0
DHH03086	0.104131	0.465145	0.999978	0
DHH03087	0.0433436	0.743959	0.999978	0
DHH03089	-0.027293	0.870354	0.999978	0
DHH03090	-0.0682059	0.664322	0.999978	0
DHH03091	-0.0864934	0.553654	0.999978	0
DHH03092	-0.061501	0.722076	0.999978	0
DHH03094	0.234838	0.172874	0.999978	0
DHH03095	-0.104755	0.260306	0.999978	0
DHH03096	0.0232484	0.848022	0.999978	0
DHH03098	0.0727603	0.674162	0.999978	0
DHH03100	-0.0182433	0.915555	0.999978	0
DHH03101	0.0362435	0.832867	0.999978	0
DHH03106	0.0602176	0.674337	0.999978	0
DHH03108	0.0191223	0.836483	0.999978	0
DHH03110	0.18008	0.287143	0.999978	0
DHH03111	0.00598859	0.964577	0.999978	0
DHH03114	-0.0631363	0.710802	0.999978	0
DHH03115	-0.109863	0.445717	0.999978	0
DHH03117	-0.161983	0.336855	0.999978	0
DHH03120	0.0862073	0.442036	0.999978	0
DHH03126	0.00129545	0.989756	0.999978	0
DHH03127	-0.175015	0.305943	0.999978	0
DHH03128	-0.0263135	0.879217	0.999978	0
DHH03130	-0.0583181	0.709895	0.999978	0
DHH03131	-0.164503	0.341489	0.999978	0
DHH03132	0.0670666	0.675039	0.999978	0
DHH03134	0.166442	0.313661	0.999978	0
DHH03137	0.0929294	0.591498	0.999978	0
DHH03142	0.0709398	0.590975	0.999978	0
DHH03147	0.140216	0.41268	0.999978	0
DHH03154	-0.0270353	0.873357	0.999978	0
DHH03156	-0.03117	0.837497	0.999978	0
DHH03157	-0.0251192	0.851217	0.999978	0
DHH03158	0.0212341	0.890497	0.999978	0
DHH03159	0.0348866	0.839361	0.999978	0
DHH03160	-0.0647763	0.708454	0.999978	0
DHH03161	0.00583043	0.973066	0.999978	0
DHH03162	-0.0449761	0.763285	0.999978	0
DHH03163	0.0456883	0.761594	0.999978	0
DHH03164	-0.175472	0.302079	0.999978	0
DHH03165	-0.123526	0.347503	0.999978	0
DHH03167	-0.0754719	0.657799	0.999978	0
DHH03170	0.0157325	0.911918	0.999978	0
DHH03173	-0.0653116	0.581559	0.999978	0
DHH03174	0.0656305	0.505044	0.999978	0
DHH03175	-0.00836327	0.854366	0.999978	0
DHH03177	-0.100587	0.313663	0.999978	0
DHH03178	-0.194179	0.145595	0.999978	0
DHH03179	0.126154	0.466	0.999978	0
DHH03181	-0.0240341	0.875266	0.999978	0
DHH03182	-0.193861	0.262098	0.999978	0
DHH03183	0.0240028	0.888993	0.999978	0
DHH03184	0.14472	0.403274	0.999978	0
DHH03185	-0.0922795	0.579702	0.999978	0
DHH03187	0.0235946	0.891591	0.999978	0
DHH03188	-0.159236	0.332828	0.999978	0
DHH03192	0.00680007	0.968163	0.999978	0
DHH03193	-0.0938469	0.587977	0.999978	0
DHH03195	-0.0595952	0.681246	0.999978	0
DHH03196	-0.0235251	0.889383	0.999978	0
DHH03197	0.196007	0.257731	0.999978	0
DHH03199	0.129127	0.423406	0.999978	0
DHH03201	0.0705488	0.681464	0.999978	0
DHH03202	0.138342	0.418062	0.999978	0
DHH03203	0.0873803	0.501721	0.999978	0
DHH03205	0.0942817	0.346746	0.999978	0
DHH03207	0.077586	0.652423	0.999978	0
DHH03208	-0.0994101	0.564151	0.999978	0
DHH03212	0.182547	0.290874	0.999978	0
DHH03213	-0.0318056	0.849138	0.999978	0
DHH03214	-0.195379	0.185346	0.999978	0
DHH03216	-0.0295701	0.707127	0.999978	0
DHH03218	0.0239339	0.864518	0.999978	0
DHH03221	0.10645	0.538139	0.999978	0
DHH03222	-0.239839	0.158988	0.999978	0
DHH03225	-0.131496	0.309791	0.999978	0
DHH03227	0.0469342	0.612268	0.999978	0
DHH03229	0.0165731	0.826707	0.999978	0
DHH03231	-0.0896942	0.599682	0.999978	0
DHH03232	0.0177669	0.817654	0.999978	0
DHH03233	-0.0980916	0.558117	0.999978	0
DHH03234	0.0781679	0.641917	0.999978	0
DHH03235	-0.00336194	0.983716	0.999978	0
DHH03236	-0.0133628	0.934315	0.999978	0
DHH03237	-0.0400032	0.80552	0.999978	0
DHH03238	-0.170499	0.225023	0.999978	0
DHH03241	-0.114614	0.490476	0.999978	0
DHH03243	0.036406	0.741277	0.999978	0
DHH03244	-0.0402424	0.810103	0.999978	0
DHH03245	-0.0809173	0.597981	0.999978	0
DHH03246	0.0648879	0.369082	0.999978	0
DHH03247	-0.119467	0.36572	0.999978	0
DHH03248	0.0721756	0.442666	0.999978	0
DHH03249	-0.0456546	0.790527	0.999978	0
DHH03250	0.180954	0.292442	0.999978	0
DHH03252	-0.00446426	0.978643	0.999978	0
DHH03254	-0.0144601	0.872311	0.999978	0
DHH03256	-0.085664	0.62029	0.999978	0
DHH03257	0.0371634	0.714205	0.999978	0
DHH03258	0.0237177	0.86036	0.999978	0
DHH03259	-0.010367	0.77918	0.999978	0
DHH03260	-0.187172	0.261475	0.999978	0
DHH03262	0.136762	0.342892	0.999978	0
DHH03263	-0.0460017	0.723989	0.999978	0
DHH03266	0.0439354	0.781737	0.999978	0
DHH03267	-0.105747	0.292944	0.999978	0
DHH03269	0.130921	0.346497	0.999978	0
DHH03270	-0.00606854	0.968713	0.999978	0
DHH03271	0.177839	0.304315	0.999978	0
DHH03276	0.040759	0.809717	0.999978	0
DHH03277	0.0564407	0.672568	0.999978	0
DHH03280	-0.0926138	0.586645	0.999978	0
DHH03281	0.0184678	0.798134	0.999978	0
DHH03285	-0.0435327	0.798838	0.999978	0
DHH03286	0.11491	0.490189	0.999978	0
DHH03288	0.0980231	0.54828	0.999978	0
DHH03289	-0.141779	0.332273	0.999978	0
DHH03291	0.191205	0.256169	0.999978	0
DHH03292	-0.123343	0.46701	0.999978	0
DHH03294	0.0599793	0.627183	0.999978	0
DHH03295	0.12421	0.46615	0.999978	0
DHH03297	-0.0751297	0.561711	0.999978	0
DHH03298	0.143823	0.30689	0.999978	0
DHH03300	0.150911	0.35106	0.999978	0
DHH03301	0.0467276	0.773415	0.999978	0
DHH03304	-0.196207	0.109363	0.999978	0
DHH03305	-0.0611416	0.657571	0.999978	0
DHH03307	-0.0954521	0.348342	0.999978	0
DHH03308	0.0743778	0.663964	0.999978	0
DHH03309	0.0131445	0.936968	0.999978	0
DHH03310	0.00506865	0.962051	0.999978	0
DHH03311	-0.00715912	0.966333	0.999978	0
DHH03312	-0.0948729	0.427195	0.999978	0
DHH03313	0.005322	0.975491	0.999978	0
DHH03315	0.0184945	0.914671	0.999978	0
DHH03317	0.0517085	0.765299	0.999978	0
DHH03320	-0.18833	0.273473	0.999978	0
DHH03321	0.121684	0.439788	0.999978	0
DHH03323	0.0989945	0.404955	0.999978	0
DHH03324	0.0540664	0.750584	0.999978	0
DHH03325	0.392962	0.0214722	0.999978	0
DHH03327	0.00216985	0.989304	0.999978	0
DHH03328	0.12571	0.467467	0.999978	0
DHH03331	0.0143571	0.921585	0.999978	0
DHH03333	0.0867609	0.616408	0.999978	0
DHH03334	0.00344868	0.975558	0.999978	0
DHH03338	-0.0503294	0.771254	0.999978	0
DHH03339	-0.0652358	0.703783	0.999978	0
DHH03341	0.0243635	0.88168	0.999978	0
DHH03344	0.0705225	0.652936	0.999978	0
DHH03345	0.0866208	0.603949	0.999978	0
DHH03346	0.195414	0.254062	0.999978	0
DHH03347	-0.348801	0.0377646	0.999978	0
DHH03350	0.0196632	0.872585	0.999978	0
DHH03351	-0.0302194	0.835694	0.999978	0
DHH03358	-0.0558622	0.719262	0.999978	0
DHH03359	-0.0622784	0.608409	0.999978	0
DHH03361	0.00588061	0.968618	0.999978	0
DHH03362	0.119074	0.484254	0.999978	0
DHH03363	-0.00637577	0.970642	0.999978	0
DHH03365	0.0100854	0.910853	0.999978	0
DHH03366	-0.1622	0.340779	0.999978	0
DHH03367	-0.183382	0.274671	0.999978	0
DHH03369	0.0778667	0.646384	0.999978	0
DHH03370	0.0428845	0.673589	0.999978	0
DHH03371	-0.0089405	0.809894	0.999978	0
DHH03373	-0.0587454	0.732272	0.999978	0
DHH03374	0.0937384	0.306086	0.999978	0
DHH03375	-0.0523954	0.694892	0.999978	0
DHH03378	-0.151478	0.348761	0.999978	0
DHH03379	0.0333435	0.732584	0.999978	0
DHH03380	0.0670198	0.698118	0.999978	0
DHH03382	-0.0190538	0.78251	0.999978	0
DHH03386	-0.060882	0.708758	0.999978	0
DHH03387	0.0457389	0.791183	0.999978	0
DHH03388	0.0359981	0.810626	0.999978	0
DHH03389	0.064759	0.70698	0.999978	0
DHH03392	-0.177911	0.301386	0.999978	0
DHH03395	0.103983	0.542333	0.999978	0
DHH03398	0.0103414	0.942991	0.999978	0
DHH03399	0.172606	0.27427	0.999978	0
DHH03403	-0.0297964	0.590616	0.999978	0
DHH03404	0.0466523	0.614581	0.999978	0
DHH03405	-0.0410002	0.679827	0.999978	0
DHH03407	0.00682195	0.961067	0.999978	0
DHH03409	0.0481692	0.603752	0.999978	0
DHH03410	0.198196	0.243716	0.999978	0
DHH03411	-0.0461337	0.726895	0.999978	0
DHH03412	0.0619196	0.683356	0.999978	0
DHH03413	0.0185017	0.903116	0.999978	0
DHH03414	0.0521043	0.70492	0.999978	0
DHH03415	-0.0363164	0.829858	0.999978	0
DHH03416	-0.00353338	0.982854	0.999978	0
DHH03419	-0.0828579	0.377659	0.999978	0
DHH03420	0.0628032	0.68193	0.999978	0
DHH03424	-0.150717	0.208946	0.999978	0
DHH03425	0.0313331	0.653844	0.999978	0
DHH03426	0.0753394	0.59745	0.999978	0
DHH03427	-0.0483877	0.661759	0.999978	0
DHH03429	0.113345	0.496728	0.999978	0
DHH03430	-0.180819	0.219003	0.999978	0
DHH03434	0.0240224	0.861473	0.999978	0
DHH03435	0.0904502	0.59822	0.999978	0
DHH03439	-0.0152156	0.850772	0.999978	0
DHH03441	-0.130097	0.411316	0.999978	0
DHH03443	-0.10241	0.367959	0.999978	0
DHH03449	-0.0386754	0.778121	0.999978	0
DHH03451	0.0709634	0.476421	0.999978	0
DHH03452	-0.0803516	0.586907	0.999978	0
DHH03454	0.0640959	0.710594	0.999978	0
DHH03455	0.060957	0.604304	0.999978	0
DHH03459	-0.0558986	0.686085	0.999978	0
DHH03460	0.120424	0.458512	0.999978	0
DHH03463	0.103431	0.371034	0.999978	0
DHH03465	0.00148003	0.992295	0.999978	0
DHH03466	-0.000736507	0.996606	0.999978	0
DHH03467	-0.279617	0.106474	0.999978	0
DHH03468	0.128397	0.449554	0.999978	0
DHH03469	-0.00631118	0.931531	0.999978	0
DHH03472	0.0758014	0.633392	0.999978	0
DHH03473	-0.130551	0.448027	0.999978	0
DHH03474	-0.0750661	0.664499	0.999978	0
DHH03475	0.0514574	0.766332	0.999978	0
DHH03478	0.129698	0.449824	0.999978	0
DHH03482	0.0232512	0.804267	0.999978	0
DHH03483	0.0489404	0.662419	0.999978	0
DHH03484	0.0213015	0.899817	0.999978	0
DHH03485	0.155584	0.322435	0.999978	0
DHH03486	-0.169721	0.320049	0.999978	0
DHH03487	-0.0139418	0.935181	0.999978	0
DHH03489	0.14808	0.294192	0.999978	0
DHH03491	0.094105	0.574257	0.999978	0
DHH03492	-0.0939625	0.525984	0.999978	0
DHH03495	-0.175226	0.275684	0.999978	0
DHH03496	-0.0304537	0.860036	0.999978	0
DHH03497	-0.187132	0.279749	0.999978	0
DHH03498	-0.0203557	0.90556	0.999978	0
DHH03500	0.111075	0.459725	0.999978	0
DHH03501	0.0824333	0.510565	0.999978	0
DHH03502	-0.100432	0.556271	0.999978	0
DHH03504	0.0528425	0.731802	0.999978	0
DHH03505	-0.0347528	0.83144	0.999978	0
DHH03509	0.0435106	0.798772	0.999978	0
DHH03510	0.0143657	0.933368	0.999978	0
DHH03512	0.109625	0.519336	0.999978	0
DHH03514	-0.0167449	0.91571	0.999978	0
DHH03518	-0.0836538	0.600625	0.999978	0
DHH03520	-0.0336785	0.833728	0.999978	0
DHH03521	0.0848205	0.624371	0.999978	0
DHH03522	0.0118413	0.943036	0.999978	0
DHH03523	-0.0141641	0.932831	0.999978	0
DHH03524	0.0512018	0.653763	0.999978	0
DHH03526	-0.00983891	0.848436	0.999978	0
DHH03527	-0.112857	0.469756	0.999978	0
DHH03529	-0.23219	0.129551	0.999978	0
DHH03530	-0.182058	0.26556	0.999978	0
DHH03531	0.0705546	0.633976	0.999978	0
DHH03533	-0.130162	0.372452	0.999978	0
DHH03534	0.0783092	0.611374	0.999978	0
DHH03535	-0.0178089	0.872821	0.999978	0
DHH03536	0.162558	0.347664	0.999978	0
DHH03537	-0.288945	0.0649801	0.999978	0
DHH03538	-0.0221085	0.890138	0.999978	0
DHH03541	0.0448097	0.60394	0.999978	0
DHH03543	-0.0116241	0.942574	0.999978	0
DHH03545	0.131703	0.358169	0.999978	0
DHH03546	0.0445333	0.796656	0.999978	0
DHH03548	0.0237681	0.890227	0.999978	0
DHH03550	-0.0934744	0.588897	0.999978	0
DHH03551	0.0715505	0.645946	0.999978	0
DHH03555	-0.0997839	0.504979	0.999978	0
DHH03556	0.0644158	0.708261	0.999978	0
DHH03557	0.123087	0.471815	0.999978	0
DHH03563	0.049347	0.766188	0.999978	0
DHH03566	0.0478711	0.62772	0.999978	0
DHH03570	-0.0826526	0.624382	0.999978	0
DHH03571	0.0124308	0.908544	0.999978	0
DHH03573	-0.0653803	0.696966	0.999978	0
DHH03574	0.0857985	0.257647	0.999978	0
DHH03577	0.0822978	0.616138	0.999978	0
DHH03579	-0.0700057	0.678584	0.999978	0
DHH03580	0.0213774	0.896375	0.999978	0
DHH03581	-0.0331923	0.83895	0.999978	0
DHH03582	-0.0189153	0.905833	0.999978	0
DHH03584	-0.0953343	0.52786	0.999978	0
DHH03586	0.00173701	0.990383	0.999978	0
DHH03587	0.00133002	0.993874	0.999978	0
DHH03592	-0.03517	0.837273	0.999978	0
DHH03593	0.0356815	0.834661	0.999978	0
DHH03594	-0.0853179	0.616035	0.999978	0
DHH03598	0.0532743	0.749055	0.999978	0
DHH03599	-0.0317655	0.634766	0.999978	0
DHH03600	-0.00430988	0.957207	0.999978	0
DHH03602	0.0261306	0.871965	0.999978	0
DHH03606	0.0531496	0.618833	0.999978	0
DHH03607	0.0751087	0.663977	0.999978	0
DHH03608	0.00575109	0.972762	0.999978	0
DHH03609	0.0325843	0.849742	0.999978	0
DHH03610	-0.0258374	0.867377	0.999978	0
DHH03615	0.0714684	0.672433	0.999978	0
DHH03619	0.0276577	0.868389	0.999978	0
DHH03621	-0.104562	0.545425	0.999978	0
DHH03622	0.173205	0.313941	0.999978	0
DHH03623	-0.0503414	0.770075	0.999978	0
DHH03625	0.165881	0.315168	0.999978	0
DHH03626	-0.0634248	0.708116	0.999978	0
DHH03627	-0.0624789	0.715521	0.999978	0
DHH03628	0.0542548	0.55652	0.999978	0
DHH03629	-0.0178773	0.783681	0.999978	0
DHH03630	-0.0201938	0.904872	0.999978	0
DHH03634	-0.000110833	0.999489	0.999978	0
DHH03636	-0.136885	0.429425	0.999978	0
DHH03637	0.133947	0.43876	0.999978	0
DHH03638	-0.0720622	0.670273	0.999978	0
DHH03640	-0.130197	0.416502	0.999978	0
DHH03641	-0.201521	0.224519	0.999978	0
DHH03645	0.027878	0.543571	0.999978	0
DHH03647	-0.101544	0.31245	0.999978	0
DHH03651	0.00343411	0.98291	0.999978	0
DHH03652	-0.0595683	0.730926	0.999978	0
DHH03656	-0.127433	0.388398	0.999978	0
DHH03658	-0.0628992	0.456845	0.999978	0
DHH03659	0.0537425	0.736295	0.999978	0
DHH03660	-0.215928	0.188394	0.999978	0
DHH03661	0.0715444	0.518574	0.999978	0
DHH03662	-0.0794572	0.632549	0.999978	0
DHH03663	-0.226191	0.183673	0.999978	0
DHH03664	0.106765	0.495858	0.999978	0
DHH03665	0.144382	0.393081	0.999978	0
DHH03666	-0.0165676	0.900497	0.999978	0
DHH03667	0.0373743	0.589666	0.999978	0
DHH03668	0.0207497	0.894143	0.999978	0
DHH03672	0.246172	0.150811	0.999978	0
DHH03673	-0.0871138	0.614338	0.999978	0
DHH03674	0.104371	0.246038	0.999978	0
DHH03675	-0.0501231	0.564725	0.999978	0
DHH03677	0.0612587	0.590111	0.999978	0
DHH03678	-0.119931	0.479604	0.999978	0
DHH03679	-0.0159558	0.926589	0.999978	0
DHH03683	0.00623598	0.963093	0.999978	0
DHH03684	-0.0570117	0.734386	0.999978	0
DHH03687	0.039143	0.796018	0.999978	0
DHH03688	-0.112938	0.512778	0.999978	0
DHH03689	-0.0137822	0.936369	0.999978	0
DHH03690	-0.0448947	0.396322	0.999978	0
DHH03693	0.0242154	0.87915	0.999978	0
DHH03694	0.0344524	0.806016	0.999978	0
DHH03695	0.0167332	0.922753	0.999978	0
DHH03700	0.00494548	0.938579	0.999978	0
DHH03702	-0.108092	0.530246	0.999978	0
DHH03705	0.140432	0.41487	0.999978	0
DHH03709	0.0238747	0.888816	0.999978	0
DHH03710	-0.0212573	0.830824	0.999978	0
DHH03711	0.00592277	0.965314	0.999978	0
DHH03712	0.147454	0.236032	0.999978	0
DHH03714	-0.0935972	0.403605	0.999978	0
DHH03715	-0.00664147	0.963127	0.999978	0
DHH03716	0.00990409	0.89909	0.999978	0
DHH03717	0.117465	0.412764	0.999978	0
DHH03719	-0.124698	0.435422	0.999978	0
DHH03721	0.00611995	0.938872	0.999978	0
DHH03722	0.00542769	0.974495	0.999978	0
DHH03725	-0.0487818	0.730683	0.999978	0
DHH03727	-0.0920045	0.585911	0.999978	0
DHH03728	0.0664232	0.635534	0.999978	0
DHH03729	-0.136709	0.423186	0.999978	0
DHH03731	-0.0374695	0.827983	0.999978	0
DHH03733	-0.116485	0.501228	0.999978	0
DHH03734	-0.0590499	0.731938	0.999978	0
DHH03735	0.157751	0.361816	0.999978	0
DHH03738	-0.0894606	0.577397	0.999978	0
DHH03739	-0.0102193	0.949513	0.999978	0
DHH03740	-0.173334	0.29778	0.999978	0
DHH03742	0.108992	0.527556	0.999978	0
DHH03744	-0.0302858	0.855909	0.999978	0
DHH03746	-0.107167	0.380833	0.999978	0
DHH03747	0.159506	0.344697	0.999978	0
DHH03748	-0.0173518	0.89497	0.999978	0
DHH03749	-0.0338724	0.835723	0.999978	0
DHH03752	0.0815007	0.287499	0.999978	0
DHH03757	0.170835	0.132147	0.999978	0
DHH03758	-0.0432978	0.743721	0.999978	0
DHH03760	0.0543717	0.729699	0.999978	0
DHH03762	0.042047	0.789415	0.999978	0
DHH03763	0.0880844	0.588552	0.999978	0
DHH03764	-0.0556055	0.745605	0.999978	0
DHH03765	-0.0730522	0.642859	0.999978	0
DHH03766	-0.0778698	0.653053	0.999978	0
DHH03767	-0.0827737	0.627688	0.999978	0
DHH03771	-0.0576989	0.73127	0.999978	0
DHH03772	-0.016996	0.919578	0.999978	0
DHH03775	0.0762046	0.6593	0.999978	0
DHH03777	0.04795	0.643631	0.999978	0
DHH03779	0.0521422	0.763409	0.999978	0
DHH03781	-0.157136	0.235454	0.999978	0
DHH03782	0.0719454	0.63	0.999978	0
DHH03783	0.026791	0.869552	0.999978	0
DHH03784	-0.0683619	0.663052	0.999978	0
DHH03785	-0.061998	0.669173	0.999978	0
DHH03787	-0.151106	0.382043	0.999978	0
DHH03789	-0.121844	0.468652	0.999978	0
DHH03790	0.0207357	0.904359	0.999978	0
DHH03793	0.185581	0.281181	0.999978	0
DHH03794	0.111349	0.51992	0.999978	0
DHH03795	-0.026714	0.871766	0.999978	0
DHH03798	0.131535	0.443274	0.999978	0
DHH03799	0.063326	0.684585	0.999978	0
DHH03801	0.113144	0.481887	0.999978	0
DHH03805	0.054464	0.667345	0.999978	0
DHH03806	0.0457351	0.778316	0.999978	0
DHH03808	0.164856	0.0881193	0.999978	0
DHH03810	0.0146612	0.932299	0.999978	0
DHH03811	-0.0930785	0.587925	0.999978	0
DHH03812	-0.0970726	0.531996	0.999978	0
DHH03813	0.084936	0.495389	0.999978	0
DHH03814	-0.0824227	0.563669	0.999978	0
DHH03815	-0.0228347	0.891901	0.999978	0
DHH03816	-0.01663	0.916423	0.999978	0
DHH03817	0.107043	0.525077	0.999978	0
DHH03818	0.0656625	0.540574	0.999978	0
DHH03821	-0.240158	0.126749	0.999978	0
DHH03822	-0.0413872	0.811137	0.999978	0
DHH03823	0.111714	0.420672	0.999978	0
DHH03825	0.030662	0.661244	0.999978	0
DHH03827	0.0597116	0.730328	0.999978	0
DHH03829	0.181642	0.288891	0.999978	0
DHH03830	0.136707	0.428808	0.999978	0
DHH03831	0.0395483	0.819404	0.999978	0
DHH03833	0.0896608	0.395382	0.999978	0
DHH03834	-0.0694852	0.511124	0.999978	0
DHH03837	0.134215	0.438494	0.999978	0
DHH03839	-0.0204773	0.883322	0.999978	0
DHH03840	0.0836351	0.622835	0.999978	0
DHH03841	-0.103797	0.395986	0.999978	0
DHH03843	0.105542	0.477541	0.999978	0
DHH03845	0.00793702	0.963252	0.999978	0
DHH03846	0.015199	0.888192	0.999978	0
DHH03847	0.000208669	0.999017	0.999978	0
DHH03849	0.048421	0.649292	0.999978	0
DHH03851	0.077189	0.592734	0.999978	0
DHH03852	0.0146884	0.931574	0.999978	0
DHH03853	0.0443793	0.576295	0.999978	0
DHH03855	-0.0148651	0.907579	0.999978	0
DHH03857	0.104925	0.544155	0.999978	0
DHH03859	-0.0632595	0.706748	0.999978	0
DHH03861	-0.1807	0.294117	0.999978	0
DHH03863	0.200257	0.233803	0.999978	0
DHH03866	0.0907046	0.589609	0.999978	0
DHH03871	0.133038	0.442387	0.999978	0
DHH03875	0.0366291	0.7955	0.999978	0
DHH03876	0.0714161	0.67526	0.999978	0
DHH03877	0.0278808	0.871963	0.999978	0
DHH03880	-0.114375	0.48431	0.999978	0
DHH03886	0.000633198	0.997082	0.999978	0
DHH03887	-0.0316967	0.849489	0.999978	0
DHH03889	0.12006	0.472894	0.999978	0
DHH03890	0.203713	0.193758	0.999978	0
DHH03895	-0.0581879	0.736946	0.999978	0
DHH03896	0.0284761	0.609588	0.999978	0
DHH03897	0.0260461	0.877314	0.999978	0
DHH03898	-0.119371	0.486201	0.999978	0
DHH03899	0.0078887	0.961456	0.999978	0
DHH03900	-0.185828	0.27554	0.999978	0
DHH03901	-0.212681	0.169673	0.999978	0
DHH03902	-0.124531	0.468657	0.999978	0
DHH03903	-0.0129494	0.935937	0.999978	0
DHH03904	-0.118351	0.407973	0.999978	0
DHH03905	0.0155033	0.928597	0.999978	0
DHH03907	-0.0264195	0.818897	0.999978	0
DHH03909	-0.012349	0.919837	0.999978	0
DHH03914	-0.0478475	0.650119	0.999978	0
DHH03916	0.00291377	0.986229	0.999978	0
DHH03918	0.0965227	0.512495	0.999978	0
DHH03919	-0.0121012	0.940786	0.999978	0
DHH03920	0.0298884	0.830715	0.999978	0
DHH03921	-0.0924066	0.554193	0.999978	0
DHH03923	-0.0089405	0.809894	0.999978	0
DHH03927	-0.0858254	0.310757	0.999978	0
DHH03928	0.0843964	0.603131	0.999978	0
DHH03929	-0.0782537	0.651445	0.999978	0
DHH03930	0.144795	0.386003	0.999978	0
DHH03935	-0.0562404	0.544293	0.999978	0
DHH03937	0.052697	0.760899	0.999978	0
DHH03938	-0.00355999	0.983501	0.999978	0
DHH03939	-0.0399145	0.797877	0.999978	0
DHH03942	-0.000625545	0.996918	0.999978	0
DHH03944	0.0516159	0.407704	0.999978	0
DHH03945	0.141929	0.396518	0.999978	0
DHH03946	0.0523538	0.745483	0.999978	0
DHH03947	-0.00929217	0.957036	0.999978	0
DHH03948	-0.0586524	0.715884	0.999978	0
DHH03949	0.0736439	0.58606	0.999978	0
DHH03956	0.0356214	0.716542	0.999978	0
DHH03959	0.0125119	0.938076	0.999978	0
DHH03961	-0.0969334	0.432816	0.999978	0
DHH03962	-0.0332219	0.843863	0.999978	0
DHH03966	-0.0895891	0.603767	0.999978	0
DHH03969	-0.0873531	0.526534	0.999978	0
DHH03970	0.104022	0.417141	0.999978	0
DHH03972	-0.16126	0.348664	0.999978	0
DHH03973	-0.0206808	0.835567	0.999978	0
DHH03974	-0.0232595	0.797436	0.999978	0
DHH03975	0.0945487	0.399353	0.999978	0
DHH03976	0.023783	0.856013	0.999978	0
DHH03977	0.0394561	0.818081	0.999978	0
DHH03978	0.0724504	0.658491	0.999978	0
DHH03979	0.0731533	0.629907	0.999978	0
DHH03981	0.0120298	0.944204	0.999978	0
DHH03982	0.0227666	0.895413	0.999978	0
DHH03983	-0.0429786	0.795134	0.999978	0
DHH03985	-0.0918667	0.581923	0.999978	0
DHH03987	-0.19205	0.267192	0.999978	0
DHH03988	0.0800258	0.614645	0.999978	0
DHH03989	-0.0688113	0.568584	0.999978	0
DHH03990	0.072365	0.645737	0.999978	0
DHH03991	-0.173643	0.311424	0.999978	0
DHH03992	-0.0487139	0.778547	0.999978	0
DHH03993	-0.0364842	0.822672	0.999978	0
DHH03996	-0.0497989	0.624268	0.999978	0
DHH04001	-0.0296101	0.863998	0.999978	0
DHH04007	0.074846	0.661178	0.999978	0
DHH04008	-0.057714	0.612566	0.999978	0
DHH04009	0.0384199	0.775465	0.999978	0
DHH04010	-0.0143936	0.826797	0.999978	0
DHH04011	0.155108	0.321974	0.999978	0
DHH04013	0.0321439	0.852397	0.999978	0
DHH04014	-0.0409355	0.765746	0.999978	0
DHH04016	0.205237	0.233344	0.999978	0
DHH04017	-0.017947	0.888139	0.999978	0
DHH04020	-0.0592605	0.729692	0.999978	0
DHH04021	0.030223	0.861187	0.999978	0
DHH04022	-0.00932293	0.950715	0.999978	0
DHH04024	-0.0630472	0.67338	0.999978	0
DHH04025	-0.136451	0.413734	0.999978	0
DHH04026	-0.189228	0.267814	0.999978	0
DHH04028	-0.198991	0.220345	0.999978	0
DHH04029	-0.0731682	0.404113	0.999978	0
DHH04030	0.107109	0.488906	0.999978	0
DHH04033	0.113202	0.508806	0.999978	0
DHH04034	-0.0211865	0.901979	0.999978	0
DHH04035	0.160652	0.264707	0.999978	0
DHH04036	-0.0239082	0.86685	0.999978	0
DHH04037	0.165682	0.276525	0.999978	0
DHH04038	-0.288955	0.0941163	0.999978	0
DHH04040	0.0290858	0.866508	0.999978	0
DHH04042	-0.194089	0.261604	0.999978	0
DHH04043	0.00676429	0.929253	0.999978	0
DHH04044	0.0386053	0.821017	0.999978	0
DHH04045	0.0308247	0.857789	0.999978	0
DHH04048	-0.0851432	0.34199	0.999978	0
DHH04049	0.0472226	0.78511	0.999978	0
DHH04051	0.0434959	0.800642	0.999978	0
DHH04052	-0.0218126	0.899426	0.999978	0
DHH04053	0.0681143	0.674033	0.999978	0
DHH04054	0.0277337	0.864587	0.999978	0
DHH04057	0.141471	0.35672	0.999978	0
DHH04058	-0.0559209	0.566302	0.999978	0
DHH04059	0.112158	0.516061	0.999978	0
DHH04060	0.050445	0.659433	0.999978	0
DHH04061	-0.00537645	0.974574	0.999978	0
DHH04062	-0.0316634	0.634207	0.999978	0
DHH04063	-0.184518	0.286634	0.999978	0
DHH04067	0.186141	0.245327	0.999978	0
DHH04071	-0.0733127	0.294573	0.999978	0
DHH04073	0.0728474	0.381882	0.999978	0
DHH04075	-0.104806	0.545081	0.999978	0
DHH04077	0.00480181	0.975573	0.999978	0
DHH04078	-0.0230582	0.838677	0.999978	0
DHH04081	-0.130933	0.449155	0.999978	0
DHH04082	0.0815091	0.615789	0.999978	0
DHH04083	0.0249666	0.433262	0.999978	0
DHH04084	0.0814401	0.499782	0.999978	0
DHH04087	0.137902	0.419183	0.999978	0
DHH04088	-0.00758019	0.951459	0.999978	0
DHH04089	0.0235946	0.87963	0.999978	0
DHH04090	0.105313	0.415254	0.999978	0
DHH04091	-0.0089313	0.950322	0.999978	0
DHH04092	-0.051184	0.721109	0.999978	0
DHH04093	0.0970089	0.574267	0.999978	0
DHH04097	0.00303597	0.982739	0.999978	0
DHH04099	0.294166	0.0885327	0.999978	0
DHH04100	0.00266107	0.952357	0.999978	0
DHH04101	0.135801	0.215593	0.999978	0
DHH04104	-0.0704169	0.673674	0.999978	0
DHH04107	-0.165321	0.203172	0.999978	0
DHH04108	0.0498791	0.773407	0.999978	0
DHH04109	0.111544	0.334885	0.999978	0
DHH04110	0.0159628	0.891376	0.999978	0
DHH04111	-0.0573457	0.387777	0.999978	0
DHH04113	0.0317535	0.854522	0.999978	0
DHH04114	0.05158	0.756574	0.999978	0
DHH04116	0.165516	0.325144	0.999978	0
DHH04117	-0.0978035	0.568601	0.999978	0
DHH04120	-0.0105221	0.951536	0.999978	0
DHH04121	-0.0767429	0.657749	0.999978	0
DHH04123	0.00513645	0.969439	0.999978	0
DHH04127	0.0853958	0.514278	0.999978	0
DHH04130	-0.100108	0.46782	0.999978	0
DHH04133	-0.156944	0.343336	0.999978	0
DHH04135	-0.0310253	0.803224	0.999978	0
DHH04136	-0.0511176	0.721628	0.999978	0
DHH04137	-0.0467992	0.786975	0.999978	0
DHH04143	-0.0219846	0.85335	0.999978	0
DHH04144	0.103504	0.504721	0.999978	0
DHH04145	-0.0415358	0.809833	0.999978	0
DHH04146	0.189206	0.274758	0.999978	0
DHH04147	0.0191244	0.889731	0.999978	0
DHH04148	-0.00275732	0.975577	0.999978	0
DHH04150	0.00316167	0.981054	0.999978	0
DHH04153	0.0427708	0.804212	0.999978	0
DHH04156	-0.0749588	0.615352	0.999978	0
DHH04157	-0.00988056	0.932452	0.999978	0
DHH04159	0.0481945	0.773486	0.999978	0
DHH04161	0.00360164	0.982903	0.999978	0
DHH04162	0.00375987	0.969185	0.999978	0
DHH04167	0.0256401	0.810502	0.999978	0
DHH04168	0.231178	0.178641	0.999978	0
DHH04172	-0.00274815	0.987298	0.999978	0
DHH04173	-0.0774142	0.649532	0.999978	0
DHH04176	-0.00671798	0.965023	0.999978	0
DHH04177	-0.0443416	0.715682	0.999978	0
DHH04179	-0.0183278	0.91283	0.999978	0
DHH04182	0.0852958	0.506622	0.999978	0
DHH04188	0.101616	0.555669	0.999978	0
DHH04191	0.0178053	0.916862	0.999978	0
DHH04192	-0.0597184	0.727296	0.999978	0
DHH04195	0.0948237	0.341616	0.999978	0
DHH04197	-0.0357111	0.812132	0.999978	0
DHH04198	-0.106588	0.515566	0.999978	0
DHH04199	0.0351433	0.835134	0.999978	0
DHH04200	0.126892	0.424769	0.999978	0
DHH04201	-0.0286292	0.801343	0.999978	0
DHH04202	-0.00827563	0.937357	0.999978	0
DHH04204	-0.161967	0.209622	0.999978	0
DHH04205	0.0251158	0.876085	0.999978	0
DHH04206	-0.0220212	0.881187	0.999978	0
DHH04209	0.00266107	0.952357	0.999978	0
DHH04211	0.144084	0.404897	0.999978	0
DHH04212	0.0908535	0.572892	0.999978	0
DHH04214	0.0212346	0.890954	0.999978	0
DHH04216	-0.0534968	0.74838	0.999978	0
DHH04217	-0.029977	0.855886	0.999978	0
DHH04219	0.199105	0.222126	0.999978	0
DHH04221	-0.0793274	0.641743	0.999978	0
DHH04222	-0.105912	0.538079	0.999978	0
DHH04223	0.0961425	0.544041	0.999978	0
DHH04229	-0.0785457	0.508225	0.999978	0
DHH04230	-0.0696642	0.638871	0.999978	0
DHH04231	-0.126815	0.407691	0.999978	0
DHH04232	-0.159715	0.306053	0.999978	0
DHH04239	0.0403408	0.731526	0.999978	0
DHH04240	-0.0579266	0.731139	0.999978	0
DHH04242	-0.220892	0.142763	0.999978	0
DHH04245	0.00620104	0.934981	0.999978	0
DHH04246	0.154288	0.33899	0.999978	0
DHH04247	-0.01709	0.918975	0.999978	0
DHH04248	-0.0884915	0.608451	0.999978	0
DHH04249	0.0205791	0.886375	0.999978	0
DHH04250	-0.0600652	0.617059	0.999978	0
DHH04253	-0.0293096	0.865149	0.999978	0
DHH04256	0.116075	0.396239	0.999978	0
DHH04257	0.0199903	0.867426	0.999978	0
DHH04258	0.0513029	0.726558	0.999978	0
DHH04264	-0.103579	0.286625	0.999978	0
DHH04266	0.0195739	0.804946	0.999978	0
DHH04267	0.102853	0.551202	0.999978	0
DHH04269	-0.00590595	0.971735	0.999978	0
DHH04276	0.0585898	0.734829	0.999978	0
DHH04279	-0.0754949	0.532433	0.999978	0
DHH04281	0.00756335	0.751713	0.999978	0
DHH04282	-0.118928	0.488201	0.999978	0
DHH04283	-0.000463346	0.996874	0.999978	0
DHH04287	0.0645709	0.708663	0.999978	0
DHH04289	-0.0681381	0.68927	0.999978	0
DHH04291	0.152039	0.380057	0.999978	0
DHH04293	-0.0564686	0.739023	0.999978	0
DHH04294	-0.0291574	0.86471	0.999978	0
DHH04303	0.00451469	0.943335	0.999978	0
DHH04305	0.102571	0.524601	0.999978	0
DHH04306	-0.0544684	0.752822	0.999978	0
DHH04307	-0.101392	0.364384	0.999978	0
DHH04308	-0.133096	0.321318	0.999978	0
DHH04309	0.0300998	0.859627	0.999978	0
DHH04311	-0.0963808	0.572618	0.999978	0
DHH04312	-0.072327	0.399354	0.999978	0
DHH04314	0.0740057	0.6692	0.999978	0
DHH04315	-0.030537	0.86003	0.999978	0
DHH04317	-0.0356362	0.811032	0.999978	0
DHH04319	0.00591449	0.925047	0.999978	0
DHH04320	-0.0510622	0.755708	0.999978	0
DHH04321	-0.0471209	0.778604	0.999978	0
DHH04324	-0.0120882	0.942785	0.999978	0
DHH04326	-0.0718316	0.379824	0.999978	0
DHH04327	0.129055	0.4563	0.999978	0
DHH04329	-0.187954	0.277892	0.999978	0
DHH04331	0.118817	0.462307	0.999978	0
DHH04332	-0.0714717	0.401749	0.999978	0
DHH04333	-0.0688046	0.592421	0.999978	0
DHH04337	-0.0775142	0.653788	0.999978	0
DHH04338	0.0262619	0.874163	0.999978	0
DHH04339	-0.0565466	0.703156	0.999978	0
DHH04343	-0.132676	0.414792	0.999978	0
DHH04347	0.15095	0.383388	0.999978	0
DHH04348	-0.0592158	0.697798	0.999978	0
DHH04349	-0.0379143	0.569166	0.999978	0
DHH04351	0.0828126	0.632588	0.999978	0
DHH04354	-0.0948957	0.576384	0.999978	0
DHH04355	-0.085299	0.618935	0.999978	0
DHH04359	-0.0573732	0.738341	0.999978	0
DHH04361	0.051354	0.766017	0.999978	0
DHH04363	-0.0842716	0.616368	0.999978	0
DHH04364	0.0552984	0.690773	0.999978	0
DHH04366	-0.00663445	0.968674	0.999978	0
DHH04367	-0.100075	0.513449	0.999978	0
DHH04368	0.111128	0.516858	0.999978	0
DHH04369	0.0107426	0.941236	0.999978	0
DHH04373	0.224472	0.112758	0.999978	0
DHH04375	0.102621	0.546987	0.999978	0
DHH04376	-0.105222	0.540756	0.999978	0
DHH04378	-0.0174135	0.919617	0.999978	0
DHH04379	-0.0158455	0.917529	0.999978	0
DHH04380	-0.0720843	0.564139	0.999978	0
DHH04382	0.0652987	0.673843	0.999978	0
DHH04383	-0.250636	0.0773746	0.999978	0
DHH04384	-0.0562325	0.701029	0.999978	0
DHH04386	0.0232469	0.887574	0.999978	0
DHH04387	0.00316182	0.985438	0.999978	0
DHH04388	-0.00409576	0.981069	0.999978	0
DHH04391	-0.1364	0.39231	0.999978	0
DHH04394	-0.173321	0.316936	0.999978	0
DHH04395	-0.0174724	0.798574	0.999978	0
DHH04398	0.0666308	0.697844	0.999978	0
DHH04404	0.168157	0.241526	0.999978	0
DHH04408	0.0450339	0.788161	0.999978	0
DHH04410	0.00958833	0.952327	0.999978	0
DHH04411	-0.162251	0.30516	0.999978	0
DHH04412	-0.0142763	0.900248	0.999978	0
DHH04414	0.0736584	0.668689	0.999978	0
DHH04417	-0.093517	0.588106	0.999978	0
DHH04420	-0.223512	0.188506	0.999978	0
DHH04421	-0.175526	0.308337	0.999978	0
DHH04422	0.106679	0.478188	0.999978	0
DHH04423	0.0362608	0.831467	0.999978	0
DHH04425	-0.0900438	0.561036	0.999978	0
DHH04427	0.100576	0.555601	0.999978	0
DHH04428	0.00852825	0.960234	0.999978	0
DHH04433	-0.026879	0.854448	0.999978	0
DHH04436	-0.0236651	0.881611	0.999978	0
DHH04439	0.0176381	0.879112	0.999978	0
DHH04442	0.0146643	0.794065	0.999978	0
DHH04444	0.160769	0.352089	0.999978	0
DHH04450	-0.0231667	0.862314	0.999978	0
DHH04453	-0.0690454	0.679102	0.999978	0
DHH04454	0.0125783	0.94207	0.999978	0
DHH04456	-0.0689914	0.675247	0.999978	0
DHH04457	0.0702715	0.683125	0.999978	0
DHH04458	-0.105896	0.340029	0.999978	0
DHH04469	-0.0092969	0.953144	0.999978	0
DHH04472	-0.028457	0.868488	0.999978	0
DHH04473	-0.0853396	0.560687	0.999978	0
DHH04474	0.113049	0.340833	0.999978	0
DHH04477	-0.141628	0.384366	0.999978	0
DHH04478	0.00504631	0.945785	0.999978	0
DHH04481	-0.0381061	0.797279	0.999978	0
DHH04483	-0.202419	0.23739	0.999978	0
DHH04489	0.019212	0.84144	0.999978	0
DHH04493	-0.00419179	0.971631	0.999978	0
DHH04494	-0.0362124	0.750006	0.999978	0
DHH04495	-0.0785544	0.61984	0.999978	0
DHH04496	-0.0173718	0.900481	0.999978	0
DHH04497	-0.0485395	0.777041	0.999978	0
DHH04500	-0.183521	0.23165	0.999978	0
DHH04501	0.104702	0.545427	0.999978	0
DHH04502	0.0212928	0.886414	0.999978	0
DHH04503	0.0274341	0.846708	0.999978	0
DHH04504	-0.0265768	0.873841	0.999978	0
DHH04506	0.0273744	0.709973	0.999978	0
DHH04507	-0.037781	0.626286	0.999978	0
DHH04509	0.110644	0.500849	0.999978	0
DHH04519	0.0769862	0.634223	0.999978	0
DHH04523	0.111206	0.418737	0.999978	0
DHH04525	0.0461012	0.630599	0.999978	0
DHH04526	0.158478	0.360254	0.999978	0
DHH04528	0.012162	0.8998	0.999978	0
DHH04530	0.03867	0.822278	0.999978	0
DHH04532	-0.191258	0.269538	0.999978	0
DHH04533	-0.0556908	0.442636	0.999978	0
DHH04534	-0.0182474	0.856523	0.999978	0
DHH04536	-0.0541716	0.656213	0.999978	0
DHH04537	0.0879231	0.574895	0.999978	0
DHH04539	-0.00945652	0.956372	0.999978	0
DHH04541	-0.0534786	0.397984	0.999978	0
DHH04543	-0.00255296	0.977783	0.999978	0
DHH04547	0.0730645	0.669808	0.999978	0
DHH04549	0.0189552	0.846773	0.999978	0
DHH04553	0.0075404	0.950132	0.999978	0
DHH04554	-0.106386	0.439233	0.999978	0
DHH04558	-0.00346186	0.982253	0.999978	0
DHH04559	-0.23399	0.171139	0.999978	0
DHH04562	0.0359939	0.81454	0.999978	0
DHH04564	-0.0154437	0.917964	0.999978	0
DHH04565	-0.00933696	0.951175	0.999978	0
DHH04568	-0.0302181	0.85577	0.999978	0
DHH04569	0.0936778	0.584317	0.999978	0
DHH04570	0.0152164	0.929942	0.999978	0
DHH04571	0.00248105	0.987174	0.999978	0
DHH04572	0.0281756	0.868057	0.999978	0
DHH04574	-0.0323993	0.833272	0.999978	0
DHH04575	-0.0169261	0.918488	0.999978	0
DHH04576	0.109252	0.526185	0.999978	0
DHH04578	0.283199	0.102068	0.999978	0
DHH04580	-0.0124812	0.936429	0.999978	0
DHH04581	0.0538873	0.742057	0.999978	0
DHH04584	-0.0263821	0.837398	0.999978	0
DHH04585	-0.0597358	0.714387	0.999978	0
DHH04586	0.180871	0.28984	0.999978	0
DHH04589	-0.0162879	0.820709	0.999978	0
DHH04590	-0.00537015	0.93997	0.999978	0
DHH04592	0.125099	0.381191	0.999978	0
DHH04594	-0.00254146	0.976816	0.999978	0
DHH04595	0.113735	0.23587	0.999978	0
DHH04598	0.0428043	0.796739	0.999978	0
DHH04599	-0.098443	0.569738	0.999978	0
DHH04603	0.134252	0.437176	0.999978	0
DHH04606	-0.00458093	0.972376	0.999978	0
DHH04607	-0.0725052	0.64017	0.999978	0
DHH04609	-0.0677093	0.612146	0.999978	0
DHH04611	0.0753426	0.649773	0.999978	0
DHH04612	0.0207406	0.867859	0.999978	0
DHH04613	0.0426169	0.770197	0.999978	0
DHH04614	0.00919086	0.957045	0.999978	0
DHH04618	0.114727	0.50781	0.999978	0
DHH04619	-0.154127	0.364977	0.999978	0
DHH04624	0.117992	0.49455	0.999978	0
DHH04627	-0.0688175	0.626776	0.999978	0
DHH04628	-0.0272314	0.859495	0.999978	0
DHH04629	0.0653999	0.705471	0.999978	0
DHH04630	0.0198317	0.908728	0.999978	0
DHH04631	0.062756	0.711837	0.999978	0
DHH04632	-0.07126	0.659805	0.999978	0
DHH04633	-0.0822268	0.576998	0.999978	0
DHH04634	0.0114479	0.940811	0.999978	0
DHH04635	-0.141964	0.383616	0.999978	0
DHH04636	0.0300101	0.845321	0.999978	0
DHH04637	-0.00920241	0.956365	0.999978	0
DHH04639	-0.052842	0.758146	0.999978	0
DHH04641	0.101541	0.551571	0.999978	0
DHH04643	-0.0500085	0.639766	0.999978	0
DHH04645	0.196862	0.135566	0.999978	0
DHH04649	-0.041936	0.790543	0.999978	0
DHH04650	-0.0694983	0.683479	0.999978	0
DHH04651	0.00854123	0.960406	0.999978	0
DHH04652	-0.144436	0.375893	0.999978	0
DHH04654	-0.106594	0.379921	0.999978	0
DHH04656	0.00756335	0.751713	0.999978	0
DHH04657	0.132919	0.44257	0.999978	0
DHH04658	0.059892	0.690383	0.999978	0
DHH04663	0.0273074	0.828112	0.999978	0
DHH04664	-0.086484	0.617419	0.999978	0
DHH04668	-0.0184194	0.915011	0.999978	0
DHH04670	0.00629986	0.954924	0.999978	0
DHH04672	0.094737	0.387225	0.999978	0
DHH04673	-0.0189096	0.880781	0.999978	0
DHH04675	-0.0746599	0.470142	0.999978	0
DHH04676	0.0283197	0.869577	0.999978	0
DHH04677	-0.0192426	0.902591	0.999978	0
DHH04679	-0.0734112	0.505305	0.999978	0
DHH04680	0.0427197	0.75285	0.999978	0
DHH04682	-0.0701668	0.659805	0.999978	0
DHH04683	0.0307311	0.806213	0.999978	0
DHH04685	0.0035095	0.983386	0.999978	0
DHH04686	-0.0118828	0.921473	0.999978	0
DHH04687	-0.0395982	0.617513	0.999978	0
DHH04688	5.0847e-05	0.999728	0.999978	0
DHH04694	0.00947571	0.955937	0.999978	0
DHH04698	0.0444721	0.772991	0.999978	0
DHH04699	-0.0886522	0.559511	0.999978	0
DHH04700	0.144064	0.372858	0.999978	0
DHH04704	0.0082894	0.941768	0.999978	0
DHH04705	0.157995	0.311458	0.999978	0
DHH04711	-0.262449	0.128378	0.999978	0
DHH04714	0.154116	0.365407	0.999978	0
DHH04715	-0.0601839	0.64602	0.999978	0
DHH04717	0.0983762	0.510805	0.999978	0
DHH04718	0.130202	0.232078	0.999978	0
DHH04720	-0.022627	0.876498	0.999978	0
DHH04721	0.0256118	0.870179	0.999978	0
DHH04723	0.0300366	0.596043	0.999978	0
DHH04724	0.0344537	0.830766	0.999978	0
DHH04725	0.00960966	0.955655	0.999978	0
DHH04726	-0.055994	0.724424	0.999978	0
DHH04727	-0.124102	0.325657	0.999978	0
DHH04728	0.0697795	0.683729	0.999978	0
DHH04730	0.0208572	0.820374	0.999978	0
DHH04732	-0.0410263	0.812548	0.999978	0
DHH04734	-0.0656827	0.453954	0.999978	0
DHH04736	-0.00168259	0.991914	0.999978	0
DHH04738	-0.0715524	0.525087	0.999978	0
DHH04741	-0.0606904	0.633044	0.999978	0
DHH04742	0.0684032	0.415685	0.999978	0
DHH04751	0.0342129	0.707057	0.999978	0
DHH04752	-0.111195	0.45607	0.999978	0
DHH04753	-0.0124019	0.917427	0.999978	0
DHH04755	0.039118	0.821274	0.999978	0
DHH04758	0.0167829	0.922785	0.999978	0
DHH04759	-0.033451	0.796608	0.999978	0
DHH04760	0.0178672	0.805356	0.999978	0
DHH04764	-0.0512549	0.661345	0.999978	0
DHH04769	0.00953921	0.955338	0.999978	0
DHH04771	-0.0892553	0.579588	0.999978	0
DHH04772	-0.169597	0.325266	0.999978	0
DHH04774	0.0357825	0.82747	0.999978	0
DHH04775	0.0181239	0.916454	0.999978	0
DHH04778	-0.01258	0.941418	0.999978	0
DHH04779	-0.118632	0.446279	0.999978	0
DHH04781	0.0993747	0.565702	0.999978	0
DHH04782	-0.022057	0.824584	0.999978	0
DHH04783	0.0108224	0.896942	0.999978	0
DHH04786	0.055534	0.747307	0.999978	0
DHH04787	0.0133514	0.900893	0.999978	0
DHH04788	-0.0489672	0.747825	0.999978	0
DHH04789	0.214172	0.215684	0.999978	0
DHH04790	-0.0438798	0.700339	0.999978	0
DHH04792	-0.0778268	0.650851	0.999978	0
DHH04793	0.179428	0.298185	0.999978	0
DHH04795	-0.12432	0.377526	0.999978	0
DHH04796	0.121654	0.412098	0.999978	0
DHH04799	0.124015	0.472676	0.999978	0
DHH04801	0.0505001	0.731313	0.999978	0
DHH04805	0.119558	0.487665	0.999978	0
DHH04806	0.205347	0.152837	0.999978	0
DHH04807	-0.00413653	0.974687	0.999978	0
DHH04808	0.196492	0.254911	0.999978	0
DHH04809	0.0238521	0.867981	0.999978	0
DHH04810	0.0366778	0.831387	0.999978	0
DHH04811	-0.0505988	0.767345	0.999978	0
DHH04812	0.0302501	0.859189	0.999978	0
DHH04815	0.0822793	0.634527	0.999978	0
DHH04816	0.0104399	0.951856	0.999978	0
DHH04818	-0.0263423	0.819981	0.999978	0
DHH04822	-0.0661026	0.702242	0.999978	0
DHH04823	0.0691455	0.479857	0.999978	0
DHH04824	0.122078	0.47253	0.999978	0
DHH04825	-0.113088	0.513812	0.999978	0
DHH04826	0.0798541	0.631766	0.999978	0
DHH04829	0.0170395	0.921647	0.999978	0
DHH04832	-0.133094	0.442327	0.999978	0
DHH04837	-0.0666686	0.692616	0.999978	0
DHH04838	0.0343402	0.835518	0.999978	0
DHH04840	-0.0529537	0.758328	0.999978	0
DHH04841	-0.118157	0.495206	0.999978	0
DHH04847	0.159435	0.355621	0.999978	0
DHH04849	-0.00675923	0.96839	0.999978	0
DHH04850	-0.0781047	0.550263	0.999978	0
DHH04851	-0.159337	0.344066	0.999978	0
DHH04855	0.00484867	0.963441	0.999978	0
DHH04856	-0.0586255	0.734069	0.999978	0
DHH04857	0.0194736	0.910465	0.999978	0
DHH04858	-0.186444	0.2814	0.999978	0
DHH04862	-0.0563039	0.745142	0.999978	0
DHH04863	0.0333435	0.732584	0.999978	0
DHH04865	-0.108723	0.404174	0.999978	0
DHH04866	-0.10574	0.342159	0.999978	0
DHH04867	-0.0201892	0.879047	0.999978	0
DHH04870	-0.0115576	0.896826	0.999978	0
DHH04873	-0.0415697	0.807618	0.999978	0
DHH04876	0.0400345	0.814673	0.999978	0
DHH04877	0.0249157	0.861431	0.999978	0
DHH04879	-0.0234754	0.869404	0.999978	0
DHH04886	-0.0963387	0.485321	0.999978	0
DHH04887	0.0610064	0.631917	0.999978	0
DHH04889	0.00392939	0.950443	0.999978	0
DHH04891	0.0404929	0.811556	0.999978	0
DHH04892	0.146147	0.358116	0.999978	0
DHH04901	-0.159578	0.316581	0.999978	0
DHH04902	-0.156092	0.189148	0.999978	0
DHH04903	0.0175483	0.896691	0.999978	0
DHH04905	0.134617	0.437033	0.999978	0
DHH04907	0.00561972	0.974055	0.999978	0
DHH04910	-0.0259859	0.875652	0.999978	0
DHH04912	0.150468	0.379429	0.999978	0
DHH04913	0.0632016	0.665767	0.999978	0
DHH04919	0.0653604	0.70577	0.999978	0
DHH04922	0.0536517	0.737649	0.999978	0
DHH04927	0.0513279	0.672195	0.999978	0
DHH04929	0.094711	0.583469	0.999978	0
DHH04930	0.0611498	0.651096	0.999978	0
DHH04931	-0.0888976	0.604467	0.999978	0
DHH04933	0.0956698	0.513531	0.999978	0
DHH04934	-0.0244486	0.83856	0.999978	0
DHH04936	-0.0549733	0.446426	0.999978	0
DHH04937	-0.127885	0.459281	0.999978	0
DHH04938	0.249617	0.145533	0.999978	0
DHH04940	-0.0734112	0.505305	0.999978	0
DHH04943	-0.0794835	0.615196	0.999978	0
DHH04946	-0.0198559	0.908745	0.999978	0
DHH04947	0.11293	0.448923	0.999978	0
DHH04949	-0.0566425	0.742102	0.999978	0
DHH04951	-0.0426403	0.714136	0.999978	0
DHH04952	-0.105381	0.471011	0.999978	0
DHH04955	-0.236142	0.172825	0.999978	0
DHH04959	0.0378535	0.738136	0.999978	0
DHH04962	-0.00519832	0.974266	0.999978	0
DHH04964	0.0342515	0.825076	0.999978	0
DHH04966	-0.0464228	0.751079	0.999978	0
DHH04968	-0.0648467	0.421985	0.999978	0
DHH04969	-0.160184	0.347487	0.999978	0
DHH04971	0.0308696	0.630026	0.999978	0
[truncated: 24,676 more rows]

## Sheet: S7
Table S7. Regions with differential CG methylation in Bravo BC samples relative to W22, Bravo teosinte and Blanco BC6
chr	start	end	CG_BravoBC1	CG_BravoBC6	CG_W22	CG_Bravo	CG_Blanco	CG_BlancoBC1	CG_BlancoBC6	DMR direction	WGS_BravoBC1	WGS_BravoBC6	WGS_W22	WGS_Bravo	WGS_Blanco	WGS_BlancoBC1	WGS_BlancoBC6	Gene overlap?	TE overlap?	CNV overlap?
3	235549701	235549800	0.636364	0.617021	0	0	0	0.0714286	0	bravoBC_high	0	0	0	0	0	1	0	NA	NA	NA
3	234590801	234590900	0.619048	0.888889	0	0	0	0	0	bravoBC_high	4	2	1	0	0	0	0	NA	NA	NA
9	105177601	105177700	0.899614	0.811024	0	0	0.125	0.333333	0	bravoBC_high	0	1	1	1	0	0	0	NA	NA	NA
9	105177501	105177600	0.862319	0.857143	0	0	0	0.285714	0.05	bravoBC_high	25	27	4	1	0	1	1	NA	NA	NA
9	105178101	105178200	0.89881	0.87931	0.0434783	0	0.142857	0	0	bravoBC_high	0	0	0	0	0	0	0	NA	NA	NA
9	105178201	105178300	0.923521	0.861538	0.0107527	0.0421053	0.327273	0.392157	0	bravoBC_high	0	0	0	0	0	0	0	NA	NA	NA
6	66393301	66393400	1	0.833333	0	0	0	0	0	bravoBC_high	3	1	0	1	3	2	4	NA	NA	NA
3	235551201	235551300	0.931148	0.919598	0	0.08	0.235294	0.08	0	bravoBC_high	5	1	0	0	0	0	0	NA	NA	NA
3	235550901	235551000	0.945455	0.920455	0.0714286	0	0.166667	0	0.125	bravoBC_high	70	54	2	0	0	1	0	NA	NA	NA
3	235550801	235550900	0.949721	0.918367	0.142857	0	0	0	0.285714	bravoBC_high	40	31	1	0	0	0	0	NA	NA	NA
7	7103901	7104000	1	0.875	0	0	0	0	0.0555556	bravoBC_high	2	0	0	0	0	1	2	NA	NA	NA
9	105177901	105178000	0.940989	0.935632	0.0138889	0	0.117647	0.448276	0.030303	bravoBC_high	0	0	0	0	0	0	0	NA	NA	NA
1	55023101	55023200	0.636364	0.6	0	0	NA	0	0	bravoBC_high	2	2	3	1	1	5	3	overlap	NA	NA
7	123791301	123791400	0.727273	0.6	0	0	0	0	0	bravoBC_high	1	1	0	0	2	1	1	overlap	NA	NA
5	3131601	3131700	0.733333	0.666667	0	0	0	0	0	bravoBC_high	1	1	2	1	2	6	1	overlap	NA	NA
4	30425101	30425200	0.675258	0.751515	0	0	0.0531915	0	0.015625	bravoBC_high	75	47	1	0	2	0	3	overlap	NA	NA
4	30426701	30426800	0.702381	0.726804	0	0	0	0	0	bravoBC_high	116	94	2	3	3	1	3	overlap	NA	NA
5	3909901	3910000	0.863636	1	0	0	0	0.3125	0	bravoBC_high	1	1	1	1	2	1	0	overlap	NA	NA
9	142086501	142086600	0.916667	1	0	0	0	0.0666667	0	bravoBC_high	2	2	0	1	2	1	3	overlap	NA	NA
6	140731401	140731500	0.944444	1	0	0	0.4	0.461538	0	bravoBC_high	3	5	1	1	0	0	1	overlap	NA	NA
5	197578201	197578300	1	1	0	0	0.181818	0	0.388889	bravoBC_high	2	0	2	2	2	3	1	overlap	NA	NA
1	307126701	307126800	1	1	0	0	0.111111	0.416667	0.3	bravoBC_high	0	0	3	0	3	0	0	overlap	NA	NA
4	30416201	30416300	0.66494	0.72549	0	0	0.0510204	0.0140845	0	bravoBC_high	15	12	0	1	2	1	1	NA	overlap	NA
10	21178501	21178600	0.733333	0.714286	0.0714286	0	0	0.111111	0	bravoBC_high	0	0	0	0	0	0	0	NA	overlap	NA
9	149221801	149221900	0.8	0.642857	0	0	0	0	0	bravoBC_high	2	2	0	1	0	0	1	overlap	overlap	NA
6	113175901	113176000	1	1	0	0	0.444444	0.333333	0.3	bravoBC_high	1	0	2	3	3	0	0	overlap	overlap	NA
1	223891901	223892000	1	1	0	0.388889	0.333333	0.571429	0.380952	bravoBC_high	0	3	4	2	0	1	2	overlap	overlap	NA
9	105207001	105207100	0.705128	0.813725	0	0.0227273	0	0	0	bravoBC_high	32	29	2	0	1	0	5	NA	NA	overlap
9	105139501	105139600	0.890909	0.888889	0	0	NA	0	0	bravoBC_high	0	1	0	0	0	0	0	NA	NA	overlap
9	105175001	105175100	0.915289	0.885375	0.0481928	0.196078	0.233333	0.0555556	0.103448	bravoBC_high	148	98	1	1	2	0	4	NA	NA	overlap
9	105175201	105175300	0.880952	0.92381	0	0	0.0769231	0	0	bravoBC_high	38	27	6	1	1	0	2	NA	NA	overlap
5	101960401	101960500	0.705761	0.715711	0.038961	0	0.0333333	0.157895	0	bravoBC_high	27	23	1	0	0	0	0	NA	overlap	overlap
5	101960201	101960300	0.797945	0.660377	0.0212766	0	0.047619	0.142857	0	bravoBC_high	95	62	1	0	1	0	1	NA	overlap	overlap
5	101959801	101959900	0.761364	0.745098	0	0	NA	0.333333	0	bravoBC_high	0	0	0	0	0	0	0	NA	overlap	overlap
5	101960901	101961000	0.863928	0.788406	0	0.0384615	0	0	0	bravoBC_high	82	55	0	0	0	0	1	NA	overlap	overlap
5	101959101	101959200	0.842466	0.81203	0	0.125	0.0526316	0	0	bravoBC_high	0	0	0	0	0	0	0	NA	overlap	overlap
5	101960101	101960200	0.844492	0.818391	0.0238095	0.15	0	0	0	bravoBC_high	75	72	0	0	2	0	2	NA	overlap	overlap
5	101960001	101960100	0.892617	0.853659	0.0333333	0.142857	0	0	0	bravoBC_high	51	55	0	0	1	0	1	NA	overlap	overlap
5	101961001	101961100	0.906188	0.86059	0	0	0.0227273	0	0	bravoBC_high	68	47	0	0	0	0	3	NA	overlap	overlap
5	101959301	101959400	0.913287	0.869347	0.0543478	0	0.166667	0.189189	0.030303	bravoBC_high	0	0	0	0	0	0	0	NA	overlap	overlap
5	101959001	101959100	0.932515	0.889868	0	0.166667	0	0	0	bravoBC_high	9	3	1	0	0	0	0	NA	overlap	overlap
6	128113201	128113300	0	0	1	0.95	1	0.4	1	bravoBC_low	3	1	0	2	1	2	2	NA	NA	NA
8	169180201	169180300	0	0	0.954545	0.666667	0.909091	0.458333	0.631579	bravoBC_low	4	0	1	1	1	3	0	NA	NA	NA
3	25646801	25646900	0	0	0.913043	1	0.958333	0.478261	0.941176	bravoBC_low	0	1	0	0	0	1	1	NA	NA	NA
3	89232601	89232700	0	0	0.714286	0.625	0.777778	0.5	0.818182	bravoBC_low	2	3	4	0	4	1	0	NA	NA	NA
1	26806901	26807000	0	0	0.666667	0.6	0.666667	0.545455	0.833333	bravoBC_low	0	0	0	0	0	0	0	NA	NA	NA
1	163800201	163800300	0	0	0.947368	0.8	0.4	0.647059	0.882353	bravoBC_low	2	2	1	1	5	0	2	NA	NA	NA
7	114134901	114135000	0	0	0.727273	0.727273	1	0.6875	0.647059	bravoBC_low	0	2	1	3	1	6	2	NA	NA	NA
4	157958501	157958600	0	0	0.866667	1	1	0.7	0.75	bravoBC_low	2	3	1	0	1	2	3	NA	NA	NA
10	39329101	39329200	0	0	0.888889	0.923077	0.842105	0.727273	0.789474	bravoBC_low	0	0	1	1	3	2	1	NA	NA	NA
2	237145801	237145900	0	0	0.8	0.608696	0.666667	0.785714	1	bravoBC_low	0	0	0	0	0	0	0	NA	NA	NA
5	20102001	20102100	0	0	0.75	0.96	0.923077	0.8	0.733333	bravoBC_low	0	0	0	0	0	0	0	NA	NA	NA
5	179379201	179379300	0	0	1	1	1	0.857143	0.944444	bravoBC_low	1	3	1	1	1	1	1	NA	NA	NA
1	4483101	4483200	0	0	0.952381	0.7	0.933333	1	0.894737	bravoBC_low	2	1	2	1	0	1	1	NA	NA	NA
2	237145701	237145800	0.0111111	0	0.928571	0.875	0.861538	0.785714	0.705882	bravoBC_low	0	0	0	0	0	0	0	NA	NA	NA
2	237087201	237087300	0.00716846	0.00404858	0.948718	0.842105	0.966667	0.73913	0.954545	bravoBC_low	5	4	0	0	0	0	0	NA	NA	NA
2	237086101	237086200	0.0151515	0	0.928571	0.7	0.766667	0.75	1	bravoBC_low	1	3	0	1	0	0	0	NA	NA	NA
5	24604601	24604700	0.047619	0	1	0.818182	NA	0.5	0.888889	bravoBC_low	0	2	1	0	1	5	2	NA	NA	NA
5	3265001	3265100	0.0251799	0.0225989	0.8	0.931818	0.818182	0.833333	0.76	bravoBC_low	0	0	0	0	0	0	0	NA	NA	NA
5	25116101	25116200	0.0555556	0	0.95	0.909091	0.923077	1	0.833333	bravoBC_low	1	0	0	0	1	0	0	NA	NA	NA
5	3265601	3265700	0.0299401	0.0352941	0.944444	0.875	0.666667	0.666667	0.75	bravoBC_low	0	0	0	0	0	0	0	NA	NA	NA
5	3265501	3265600	0.0318665	0.0389972	0.847826	0.746667	0.95122	0.875	0.847826	bravoBC_low	0	0	0	0	0	0	0	NA	NA	NA
5	95230801	95230900	0.0287129	0.0451613	0.954887	0.785714	0.643678	0.875	0.928571	bravoBC_low	0	1	0	0	0	1	1	NA	NA	NA
4	69953801	69953900	0	0.0784314	0.842857	0.90566	1	0.680851	0.714286	bravoBC_low	1	0	0	0	0	0	1	NA	NA	NA
5	3265701	3265800	0.0191693	0.0610329	0.774194	0.875	0.5625	0.9	1	bravoBC_low	0	0	0	0	0	0	0	NA	NA	NA
10	143972101	143972200	0	0.0909091	0.8	0.769231	NA	0.608696	0.833333	bravoBC_low	1	0	3	1	0	2	1	NA	NA	NA
5	95230701	95230800	0.0589255	0.0364964	0.806452	0.79798	0.85	0.947368	1	bravoBC_low	0	1	0	0	0	1	1	NA	NA	NA
5	3274201	3274300	0.0506536	0.0504732	0.882353	0.926829	1	0.978261	0.813559	bravoBC_low	0	0	0	0	0	0	0	NA	NA	NA
1	271472201	271472300	0.0798319	0.025641	0.830189	0.82963	0.883333	1	0.852941	bravoBC_low	0	0	0	0	0	0	0	NA	NA	NA
4	147714201	147714300	0	0.111111	0.923077	0.818182	0.909091	0.863636	0.894737	bravoBC_low	0	1	4	1	0	1	0	NA	NA	NA
7	141172601	141172700	0.0520833	0.0789474	1	0.857143	0.916667	1	0.777778	bravoBC_low	0	3	0	1	1	0	0	NA	NA	NA
5	3274101	3274200	0.0757576	0.0620155	0.904762	0.875	0.833333	0.909091	0.791667	bravoBC_low	0	0	0	0	0	0	0	NA	NA	NA
10	34550501	34550600	0.0824561	0.07109	0.925926	0.947368	0.711864	0.884615	0.835616	bravoBC_low	0	0	0	0	0	0	0	NA	NA	NA
5	95230901	95231000	0.0606061	0.101266	1	0.916667	0.777778	0.875	0.888889	bravoBC_low	0	0	0	0	0	0	0	NA	NA	NA
3	232482301	232482400	0.0656934	0.0987654	0.8	0.8	0.923077	0.923077	0.882353	bravoBC_low	37	30	1	1	1	3	0	NA	NA	NA
5	3265401	3265500	0.114035	0.0597015	0.904762	0.933333	0.5	0.888889	0.75	bravoBC_low	0	0	0	0	0	0	0	NA	NA	NA
7	18594601	18594700	0.0979021	0.0934579	0.810606	0.846154	0.711111	0.883721	0.713043	bravoBC_low	0	0	0	0	3	0	0	NA	NA	NA
1	53424501	53424600	0.037037	0.166667	0.863636	0.8125	1	0.857143	0.875	bravoBC_low	2	2	0	1	3	1	4	NA	NA	NA
4	6813901	6814000	0.208333	0	0.909091	1	1	0.8	1	bravoBC_low	2	1	2	1	0	1	0	NA	NA	NA
3	187337801	187337900	0.0909091	0.125	0.833333	1	0.823529	0.833333	1	bravoBC_low	1	2	2	1	1	1	1	NA	NA	NA
7	18594701	18594800	0.0818414	0.146018	0.893333	0.875	0.59322	0.792453	0.892857	bravoBC_low	0	0	0	0	3	0	0	NA	NA	NA
3	146751901	146752000	0.230769	0	1	1	0.95	0.75	0.9	bravoBC_low	1	3	1	1	3	3	2	NA	NA	NA
5	3265801	3265900	0.21831	0.0315789	0.9	1	1	0.888889	1	bravoBC_low	0	0	0	0	0	0	0	NA	NA	NA
2	183886501	183886600	0	0.25	1	1	0.846154	1	0.882353	bravoBC_low	0	1	2	1	1	2	1	NA	NA	NA
1	163781701	163781800	0.133333	0.125	0.826087	0.75	0.904762	1	0.818182	bravoBC_low	1	0	2	1	2	4	1	NA	NA	NA
10	34550401	34550500	0.100897	0.180769	0.951613	1	0.90625	0.875	0.875912	bravoBC_low	0	0	0	0	0	0	0	NA	NA	NA
9	105142701	105142800	0.148867	0.141667	0.833333	0.923077	1	1	0.9375	bravoBC_low	24	15	1	2	0	1	0	NA	NA	NA
5	3265201	3265300	0.162562	0.18	0.859375	0.780488	0.714286	0.96875	0.805556	bravoBC_low	0	1	0	0	0	0	0	NA	NA	NA
1	253941801	253941900	0.148148	0.210526	0.840909	0.818182	0.666667	0.741935	0.851852	bravoBC_low	3	3	0	2	2	1	0	NA	NA	NA
1	271472301	271472400	0.137615	0.222222	0.935484	0.864865	0.833333	1	0.896552	bravoBC_low	0	0	0	0	0	0	0	NA	NA	NA
1	241825501	241825600	0.157895	0.214286	0.941176	0.888889	NA	0.692308	0.869565	bravoBC_low	1	0	0	0	1	0	0	NA	NA	NA
6	144531001	144531100	0.214286	0.2	0.958333	0.9375	1	1	0.833333	bravoBC_low	0	0	0	0	0	0	0	NA	NA	NA
5	92861301	92861400	0.244275	0.183673	0.87234	1	0.866667	0.9375	0.92	bravoBC_low	0	0	0	0	0	0	0	NA	NA	NA
7	174436501	174436600	0.272727	0.2	0.888889	0.933333	0.857143	1	1	bravoBC_low	2	1	0	1	2	2	0	NA	NA	NA
5	207999501	207999600	0.246862	0.242188	0.966216	0.869048	0.862434	0.846154	0.963855	bravoBC_low	0	0	0	0	0	0	0	NA	NA	NA
5	28359301	28359400	0	0	0.842105	0.875	0.928571	0.461538	0.615385	bravoBC_low	1	4	3	2	0	1	1	overlap	NA	NA
7	620901	621000	0	0	0.909091	0.75	0.818182	0.5	0.75	bravoBC_low	3	1	0	3	3	4	1	overlap	NA	NA
6	126920901	126921000	0	0	0.954545	1	0.444444	0.533333	0.909091	bravoBC_low	3	1	2	1	2	3	1	overlap	NA	NA
1	60527701	60527800	0	0	0.818182	0.916667	0.894737	0.647059	0.625	bravoBC_low	0	1	1	0	0	0	0	overlap	NA	NA
10	7913101	7913200	0	0	1	0.692308	0.952381	0.666667	1	bravoBC_low	1	4	0	1	2	3	2	overlap	NA	NA
9	144925801	144925900	0	0	0.684211	1	NA	0.727273	0.818182	bravoBC_low	1	3	0	1	0	2	0	overlap	NA	NA
2	237087301	237087400	0.0219966	0.019802	0.945946	0.730769	0.777778	0.886364	0.940299	bravoBC_low	7	8	0	0	0	0	0	overlap	NA	NA
5	3269601	3269700	0.0182927	0.0833333	0.863636	1	1	0.777778	0.823529	bravoBC_low	0	0	0	0	0	0	0	overlap	NA	NA
9	104994301	104994400	0.0810277	0.0622407	0.810811	0.709677	0.952381	1	1	bravoBC_low	0	1	0	0	0	0	0	overlap	NA	NA
9	104994401	104994500	0.0734394	0.0757576	0.760417	0.896552	0.95	0.791667	0.888889	bravoBC_low	0	0	0	0	0	0	0	overlap	NA	NA
3	160770401	160770500	0	0.2	0.809524	1	0.875	0.888889	0.8	bravoBC_low	0	1	1	0	1	1	3	overlap	NA	NA
3	56085901	56086000	0	0.2	0.923077	0.870968	0.857143	1	0.8	bravoBC_low	0	0	0	0	0	0	0	overlap	NA	NA
9	104994201	104994300	0.155172	0.0543478	0.909091	0.818182	0.909091	1	1	bravoBC_low	0	1	0	0	0	0	0	overlap	NA	NA
1	258527101	258527200	0	0.222222	1	1	0.941176	1	1	bravoBC_low	3	2	4	2	3	0	3	overlap	NA	NA
2	111281601	111281700	0.198675	0.158333	0.969697	0.96	NA	0.914286	0.954545	bravoBC_low	0	0	0	0	0	0	0	overlap	NA	NA
8	70326401	70326500	0	0	0.875	1	0.583333	0.411765	0.714286	bravoBC_low	0	0	0	1	0	1	0	NA	overlap	NA
4	17458201	17458300	0	0	0.9	0.8	0.928571	0.461538	0.857143	bravoBC_low	0	0	0	0	0	0	0	NA	overlap	NA
9	105094301	105094400	0	0	0.8	0.866667	NA	0.5	0.785714	bravoBC_low	2	1	1	1	0	0	1	NA	overlap	NA
2	237079201	237079300	0	0	0.833333	0.733333	0.846154	0.75	0.928571	bravoBC_low	10	5	0	0	0	0	0	NA	overlap	NA
9	40036701	40036800	0	0	0.826087	0.875	1	0.75	0.954545	bravoBC_low	0	0	0	2	0	2	0	NA	overlap	NA
3	145449701	145449800	0	0	0.866667	1	NA	0.9	0.875	bravoBC_low	0	0	0	0	0	0	0	NA	overlap	NA
2	237082201	237082300	0	0	0.921053	0.815789	0.823529	0.906977	1	bravoBC_low	0	0	0	0	0	1	0	NA	overlap	NA
9	105081601	105081700	0	0	0.92	0.767857	0.852941	0.954545	1	bravoBC_low	0	0	0	0	0	0	0	NA	overlap	NA
9	105084201	105084300	0	0	0.75	0.65	0.75	1	0.75	bravoBC_low	1	0	0	0	0	0	0	NA	overlap	NA
2	237080901	237081000	0	0	0.818182	0.714286	1	1	0.75	bravoBC_low	15	14	0	0	0	0	0	NA	overlap	NA
9	105074001	105074100	0	0	0.941176	0.714286	1	1	0.846154	bravoBC_low	0	0	0	0	0	0	0	NA	overlap	NA
2	137136701	137136800	0	0	0.769231	0.75	NA	1	0.9	bravoBC_low	0	0	0	0	0	0	0	NA	overlap	NA
9	105076101	105076200	0	0	0.878788	0.625	NA	1	0.823529	bravoBC_low	1	0	0	0	0	0	0	NA	overlap	NA
9	105082901	105083000	0	0	0.909091	1	NA	1	0.833333	bravoBC_low	1	0	0	0	0	0	0	NA	overlap	NA
9	105088701	105088800	0	0	0.818182	0.875	NA	1	0.833333	bravoBC_low	0	1	1	2	0	0	6	NA	overlap	NA
5	202362401	202362500	0	0	0.941176	1	NA	1	1	bravoBC_low	0	0	0	0	0	0	0	NA	overlap	NA
2	58778001	58778100	0.0588235	0	0.913043	0.6875	1	0.466667	0.9375	bravoBC_low	0	0	0	0	0	1	0	NA	overlap	NA
2	237084801	237084900	0.0754717	0	0.909091	0.855422	0.823529	0.868852	0.88	bravoBC_low	0	2	0	0	0	1	0	NA	overlap	NA
4	22562101	22562200	0.0833333	0	0.857143	1	0.928571	0.636364	0.888889	bravoBC_low	3	1	1	1	2	0	2	NA	overlap	NA
10	51159601	51159700	0.0303644	0.0561056	0.714286	0.959459	0.755853	1	0.772727	bravoBC_low	6	3	0	2	4	0	0	NA	overlap	NA
9	105044401	105044500	0	0.111111	0.862069	0.888889	NA	1	0.777778	bravoBC_low	0	2	1	1	1	1	4	NA	overlap	NA
5	151723601	151723700	0.08	0.0322581	0.928571	1	0.903846	0.75	1	bravoBC_low	0	0	0	0	0	0	0	NA	overlap	NA
2	237079601	237079700	0.133333	0	0.815217	0.8	0.7	0.85	0.931034	bravoBC_low	0	0	0	0	0	0	0	NA	overlap	NA
7	78911101	78911200	0.0376106	0.120805	0.810345	0.764706	0.722222	0.94	0.943396	bravoBC_low	1	1	0	0	0	0	0	NA	overlap	NA
10	51159701	51159800	0.0712531	0.106383	0.847059	0.818898	0.903427	0.819672	0.875	bravoBC_low	7	3	0	3	4	1	0	NA	overlap	NA
9	105028101	105028200	0.190751	0.0111111	0.8	0.791667	0.75	0.782609	0.966667	bravoBC_low	0	0	0	0	0	0	0	NA	overlap	NA
10	51159501	51159600	0.0237467	0.181435	0.981481	0.903226	0.835106	0.972222	0.885246	bravoBC_low	0	0	0	0	0	0	0	NA	overlap	NA
2	237083901	237084000	0.0754717	0.142857	0.95	0.814815	0.86	0.865385	0.925926	bravoBC_low	1	2	0	0	0	0	1	NA	overlap	NA
9	146918901	146919000	0.11831	0.106509	0.912281	0.863636	0.952381	0.857143	0.72	bravoBC_low	0	0	0	0	0	0	0	NA	overlap	NA
10	52558701	52558800	0.0481928	0.201149	0.946429	0.857843	0.867424	0.92	0.966667	bravoBC_low	0	0	0	0	0	0	0	NA	overlap	NA
9	105083801	105083900	0.0869565	0.181818	0.904762	0.875	NA	0.974359	0.82	bravoBC_low	0	0	0	0	0	0	0	NA	overlap	NA
9	105076501	105076600	0.130682	0.139344	0.981818	0.861111	NA	1	0.93617	bravoBC_low	0	0	0	0	0	0	0	NA	overlap	NA
9	105073601	105073700	0.114754	0.172414	0.824561	0.803571	0.6	0.894737	0.867925	bravoBC_low	0	0	0	0	0	0	0	NA	overlap	NA
4	166422201	166422300	0.153846	0.166667	0.851852	0.875	1	0.866667	0.789474	bravoBC_low	2	0	2	2	0	4	2	NA	overlap	NA
6	118458001	118458100	0.207101	0.121429	0.978723	0.859649	0.955882	0.853659	0.97561	bravoBC_low	0	0	0	0	0	0	0	NA	overlap	NA
10	34550901	34551000	0.152104	0.214634	0.935484	1	0.932432	0.722222	0.857143	bravoBC_low	1	5	1	1	0	0	1	NA	overlap	NA
1	214574901	214575000	0.229508	0.138462	0.958904	0.888889	0.836066	0.957447	1	bravoBC_low	0	0	0	0	0	0	0	NA	overlap	NA
1	289788901	289789000	0.195876	0.266667	0.916667	0.909091	0.926471	1	1	bravoBC_low	0	0	0	0	0	0	0	NA	overlap	NA
2	159990301	159990400	0.25	0.333333	0.944444	1	1	1	1	bravoBC_low	0	0	0	0	0	0	0	NA	overlap	NA
1	6263101	6263200	0.316239	0.320755	0.923077	0.941176	1	0.916667	1	bravoBC_low	2	1	0	0	1	1	0	NA	overlap	NA
2	237168101	237168200	0	0	0.956522	0.75	1	0.708333	0.934783	bravoBC_low	0	0	0	0	0	0	0	overlap	overlap	NA
10	34553601	34553700	0.0797872	0.0261438	0.983193	0.962121	0.793103	0.981481	0.723077	bravoBC_low	0	0	0	0	0	0	0	overlap	overlap	NA
7	13881801	13881900	0.117241	0.0611111	0.925926	0.9375	NA	0.882353	0.919355	bravoBC_low	2	1	0	0	0	0	0	overlap	overlap	NA
10	34553701	34553800	0.186969	0.120603	0.973333	0.982143	0.935484	1	0.954545	bravoBC_low	0	0	1	0	0	1	0	overlap	overlap	NA
2	237123801	237123900	0.0636704	0.103226	0.905405	0.916667	0.885714	0.959184	0.870968	bravoBC_low	20	15	2	2	1	1	1	NA	NA	overlap
2	237123901	237124000	0.188312	0.0847458	0.828571	0.806452	0.75	0.88	0.853659	bravoBC_low	14	12	1	1	1	1	0	NA	NA	overlap
2	237123201	237123300	0.025641	0.0520833	0.866667	0.785714	1	0.846154	1	bravoBC_low	40	26	2	3	2	1	2	overlap	NA	overlap
2	237123301	237123400	0.05	0.032967	0.816327	0.837838	0.883721	0.8	0.78125	bravoBC_low	66	48	3	0	2	0	3	overlap	NA	overlap
2	237122901	237123000	0.166038	0.0897436	0.836735	0.891304	0.84375	0.958333	0.83871	bravoBC_low	24	18	2	1	1	1	2	overlap	NA	overlap
2	111263201	111263300	0.2	0.263158	0.944444	0.928571	NA	0.933333	0.9375	bravoBC_low	2	2	0	0	0	0	0	overlap	NA	overlap
9	105069701	105069800	0	0	0.9	0.866667	NA	0.925926	0.857143	bravoBC_low	1	1	0	0	0	0	0	NA	overlap	overlap
2	237143501	237143600	0.0434783	0.0470588	0.833333	0.769231	0.714286	0.875	0.923077	bravoBC_low	43	24	0	1	5	3	2	NA	overlap	overlap
6	54852401	54852500	0.0833333	0.0727273	0.796296	0.684211	0.630435	1	0.852941	bravoBC_low	19	19	0	5	8	3	1	NA	overlap	overlap
2	237143601	237143700	0.101695	0.14	0.882353	0.761194	0.675676	0.88	0.785714	bravoBC_low	48	25	1	1	2	2	4	NA	overlap	overlap
9	105069201	105069300	0	0	0.866667	0.842105	0.928571	0.8	1	bravoBC_low	0	0	0	0	0	0	0	overlap	overlap	overlap
9	105068601	105068700	0.0648649	0.0509554	0.930233	0.844444	0.777778	0.891892	0.833333	bravoBC_low	0	1	0	0	0	0	0	overlap	overlap	overlap
9	105066501	105066600	0.0864198	0.0408163	0.941176	1	1	0.9	0.857143	bravoBC_low	65	69	0	0	0	1	5	overlap	overlap	overlap

## Sheet: S8
Table S8. Regions with differential CHG methylation in Bravo BC samples relative to W22, Bravo teosinte and Blanco BC6
chr	start	end	CHG_BravoBC1	CHG_BravoBC6	CHG_W22	CHG_Bravo	CHG_Blanco	CHG_BlancoBC1	CHG_BlancoBC6	DMR direction	WGS_BravoBC1	WGS_BravoBC6	WGS_W22	WGS_Bravo	WGS_Blanco	WGS_BlancoBC1	WGS_BlancoBC6	Gene overlap?	TE overlap?	CNV overlap?
3	235551201	235551300	0.668246	0.673469	0	0	0.0555556	0	0	bravoBC_high	5	1	0	0	0	0	0	NA	NA	NA
1	297421401	297421500	1	0.666667	0	0	NA	0	0	bravoBC_high	0	0	0	0	0	0	0	NA	NA	NA
8	79078601	79078700	0.8	1	0.2	0	NA	0	0	bravoBC_high	0	0	0	0	0	0	1	NA	NA	NA
6	35039701	35039800	0.818182	1	0.166667	0	NA	0.2	0	bravoBC_high	0	0	0	0	0	0	0	NA	NA	NA
4	55614501	55614600	0.833333	1	0.125	0	0.333333	0	0.2	bravoBC_high	0	0	0	0	0	0	0	NA	NA	NA
3	235551101	235551200	0.941309	0.892361	0	0.172414	0.05	0	0.0208333	bravoBC_high	1	0	0	0	0	0	0	NA	NA	NA
4	166276201	166276300	1	1	0.375	0.4	0.166667	0	0.3	bravoBC_high	0	2	2	2	1	0	3	NA	NA	NA
7	137711401	137711500	1	1	0.25	0.2	0.428571	0	0.333333	bravoBC_high	0	0	0	0	0	0	0	NA	NA	NA
10	126457001	126457100	1	1	0.4	0	0.5	0	0.2	bravoBC_high	0	0	2	1	0	0	1	NA	NA	NA
1	276056801	276056900	1	1	0.25	0	NA	0.142857	0.285714	bravoBC_high	1	3	2	0	3	3	1	NA	NA	NA
2	103181901	103182000	1	1	0.3	0.333333	0.444444	0.2	0.333333	bravoBC_high	0	0	0	0	1	0	0	NA	NA	NA
1	30273401	30273500	1	1	0.0909091	0	NA	0.2	0.0769231	bravoBC_high	1	1	2	1	4	3	0	NA	NA	NA
4	217025701	217025800	1	1	0.25	0	0	0.333333	0.25	bravoBC_high	2	2	1	1	0	1	1	NA	NA	NA
1	219330301	219330400	1	1	0	0.333333	0.25	0.333333	0.285714	bravoBC_high	1	0	2	0	0	2	0	NA	NA	NA
6	112453701	112453800	1	1	0.25	0.2	0.4	0.333333	0.333333	bravoBC_high	0	0	0	0	0	0	0	NA	NA	NA
9	116409101	116409200	1	1	0	0	NA	0.333333	0.333333	bravoBC_high	0	1	0	1	0	1	1	NA	NA	NA
8	108613701	108613800	1	1	0.166667	0.4	NA	0.333333	0.25	bravoBC_high	2	1	1	1	2	2	2	NA	NA	NA
2	122855801	122855900	1	1	0.363636	0.285714	0.307692	0.4	0.375	bravoBC_high	0	0	0	0	0	0	0	NA	NA	NA
7	161038901	161039000	1	1	0.333333	0.333333	NA	0.4	0	bravoBC_high	2	0	1	2	1	1	1	NA	NA	NA
10	33783501	33783600	1	1	0.25	0.25	0.2	0.571429	0.25	bravoBC_high	0	0	0	0	0	0	0	NA	NA	NA
NA	23801	23900	1	1	0.222222	0	0	NA	0	bravoBC_high	NA	NA	NA	NA	NA	NA	NA	NA	NA	NA
10	33978801	33978900	1	1	0.142857	0	0	NA	0	bravoBC_high	0	0	0	0	0	0	0	NA	NA	NA
6	111276601	111276700	1	1	0	0	NA	NA	0	bravoBC_high	0	0	0	0	0	0	1	NA	NA	NA
10	128907101	128907200	1	1	0	0.25	NA	NA	0	bravoBC_high	0	2	0	2	2	2	1	NA	NA	NA
4	30427301	30427400	0.785847	0.797101	0.0228571	0	0.0813953	0.0309278	0.0396825	bravoBC_high	50	33	2	0	4	2	2	overlap	NA	NA
4	30426701	30426800	0.925408	0.893491	0.0113636	0	0.0181818	0	0	bravoBC_high	116	94	2	3	3	1	3	overlap	NA	NA
2	10422201	10422300	0.833333	1	0.222222	0	0	0.5	0	bravoBC_high	1	3	2	1	1	1	3	overlap	NA	NA
4	162565301	162565400	0.75	0.75	0.142857	0	NA	0.25	0.125	bravoBC_high	0	0	0	0	0	0	0	NA	overlap	NA
8	36152301	36152400	0.6	1	0	0	NA	0	0	bravoBC_high	0	0	0	0	0	0	0	NA	overlap	NA
10	919201	919300	0.8	0.857143	0.2	0	0	0.2	0.125	bravoBC_high	0	0	0	0	0	0	0	NA	overlap	NA
8	173547701	173547800	0.666667	1	0	0	NA	NA	0	bravoBC_high	0	0	0	0	0	0	0	NA	overlap	NA
7	172134901	172135000	1	0.75	0.142857	0	NA	0	0	bravoBC_high	0	0	0	0	0	0	0	NA	overlap	NA
7	157281501	157281600	1	0.75	0	0	0.2	0.333333	0	bravoBC_high	0	0	0	0	0	0	0	NA	overlap	NA
9	122117101	122117200	0.833333	1	0	0	0	NA	0.2	bravoBC_high	0	0	0	0	0	0	0	NA	overlap	NA
1	50920401	50920500	0.875	1	0.266667	0.25	0.333333	0.384615	0.125	bravoBC_high	0	0	0	0	1	0	0	NA	overlap	NA
7	147896001	147896100	1	1	0.142857	0	0	0	0.166667	bravoBC_high	0	0	0	0	0	0	0	NA	overlap	NA
8	2861901	2862000	1	1	0.2	0	0	0	0.125	bravoBC_high	0	0	0	0	0	0	0	NA	overlap	NA
5	213384701	213384800	1	1	0.0909091	0	0	0	0	bravoBC_high	0	0	0	0	0	0	0	NA	overlap	NA
2	183637201	183637300	1	1	0.285714	0.2	0.25	0	0	bravoBC_high	0	0	0	0	0	0	0	NA	overlap	NA
6	4842601	4842700	1	1	0.2	0	0.25	0	0.25	bravoBC_high	0	0	0	0	0	0	0	NA	overlap	NA
5	174937001	174937100	1	1	0.285714	0.333333	0.25	0	0.25	bravoBC_high	0	0	0	0	0	0	0	NA	overlap	NA
3	239666901	239667000	1	1	0.375	0.333333	0.285714	0	0	bravoBC_high	0	0	0	0	0	0	0	NA	overlap	NA
7	135598501	135598600	1	1	0.4	0.2	NA	0	0.3	bravoBC_high	0	0	0	0	0	0	0	NA	overlap	NA
7	148838701	148838800	1	1	0	0	NA	0	0.333333	bravoBC_high	0	0	0	0	0	0	0	NA	overlap	NA
10	28327401	28327500	1	1	0.333333	0	NA	0	0	bravoBC_high	0	0	0	0	0	0	0	NA	overlap	NA
9	12082101	12082200	1	1	0.166667	0.25	0	0.125	0	bravoBC_high	0	0	0	0	0	0	0	NA	overlap	NA
5	210501701	210501800	1	1	0.4	0.375	0.333333	0.166667	0.363636	bravoBC_high	0	0	0	0	0	0	0	NA	overlap	NA
7	140177601	140177700	1	1	0.333333	0	0	0.25	0.25	bravoBC_high	0	0	0	0	0	0	0	NA	overlap	NA
5	201914401	201914500	1	1	0.375	0.4	0	0.25	0.4	bravoBC_high	0	0	0	0	0	1	1	NA	overlap	NA
2	219371401	219371500	1	1	0.375	0.2	NA	0.25	0.333333	bravoBC_high	0	0	0	0	0	0	0	NA	overlap	NA
5	151059601	151059700	1	1	0.333333	0	NA	0.25	0	bravoBC_high	0	0	0	0	0	0	0	NA	overlap	NA
10	95312401	95312500	1	1	0.384615	0.333333	0.5	0.285714	0.142857	bravoBC_high	0	0	0	0	0	0	0	NA	overlap	NA
7	149198701	149198800	1	1	0.3	0	0	0.333333	0.3	bravoBC_high	0	0	0	0	0	0	0	NA	overlap	NA
4	105916801	105916900	1	1	0	0	0.333333	0.333333	0.4	bravoBC_high	0	0	0	0	0	0	0	NA	overlap	NA
1	35484201	35484300	1	1	0.333333	0.125	0.333333	0.333333	0	bravoBC_high	0	1	0	0	1	0	0	NA	overlap	NA
1	49086301	49086400	1	1	0.2	0.25	0.4	0.333333	0.166667	bravoBC_high	0	0	0	0	0	0	0	NA	overlap	NA
3	125661601	125661700	1	1	0.333333	0.357143	0.5	0.333333	0	bravoBC_high	0	0	0	0	0	0	0	NA	overlap	NA
9	16686501	16686600	1	1	0.333333	0	NA	0.333333	0	bravoBC_high	0	0	0	0	0	0	0	NA	overlap	NA
9	156602001	156602100	1	1	0.384615	0	0	0.4	0.4	bravoBC_high	0	0	0	0	0	0	0	NA	overlap	NA
10	127417301	127417400	1	1	0.333333	0.125	NA	0.4	0.25	bravoBC_high	0	0	1	0	0	1	1	NA	overlap	NA
5	187338601	187338700	1	1	0.222222	0.333333	NA	0.4	0.2	bravoBC_high	0	0	0	0	0	0	0	NA	overlap	NA
5	111709101	111709200	1	1	0.2	0.166667	0.3	0.411765	0.235294	bravoBC_high	0	0	0	0	0	0	0	NA	overlap	NA
1	206074001	206074100	1	1	0.3125	0	0	0.5	0	bravoBC_high	0	1	1	1	0	1	0	NA	overlap	NA
2	210062001	210062100	1	1	0	0	0.25	0.5	0	bravoBC_high	0	0	0	0	0	0	0	NA	overlap	NA
5	165026601	165026700	1	1	0.166667	0.166667	0.285714	0.5	0.2	bravoBC_high	0	0	0	0	0	0	0	NA	overlap	NA
4	60008401	60008500	1	1	0.333333	0.333333	0.333333	0.5	0	bravoBC_high	0	0	0	0	0	0	0	NA	overlap	NA
9	114990501	114990600	1	1	0.285714	0.25	0.333333	0.5	0	bravoBC_high	0	0	0	0	0	0	0	NA	overlap	NA
3	51544001	51544100	1	1	0.333333	0	NA	0.5	0.142857	bravoBC_high	0	0	0	0	0	0	0	NA	overlap	NA
4	229029901	229030000	1	1	0	0	NA	0.5	0.25	bravoBC_high	0	0	0	0	0	0	0	NA	overlap	NA
1	6875801	6875900	1	1	0.25	0.333333	NA	0.5	0.0909091	bravoBC_high	0	0	0	0	0	0	0	NA	overlap	NA
7	97212901	97213000	1	1	0.25	0.111111	0.142857	0.571429	0	bravoBC_high	0	0	0	0	0	0	0	NA	overlap	NA
10	116135101	116135200	1	1	0.3	0.285714	0.5	0.571429	0.25	bravoBC_high	0	0	0	0	0	0	0	NA	overlap	NA
6	113988001	113988100	1	1	0.333333	0	0.285714	0.6	0.4	bravoBC_high	0	1	0	0	0	0	0	NA	overlap	NA
1	251068001	251068100	1	1	0.25	0.2	0.5	0.6	0.2	bravoBC_high	0	0	0	0	0	0	0	NA	overlap	NA
9	1872901	1873000	1	1	0.25	0	NA	0.6	0.333333	bravoBC_high	0	1	0	0	0	1	0	NA	overlap	NA
10	63438301	63438400	1	1	0.2	0	NA	0.6	0.222222	bravoBC_high	0	0	0	0	0	0	0	NA	overlap	NA
5	184816501	184816600	1	1	0	0	0	NA	0	bravoBC_high	0	0	0	0	0	0	0	NA	overlap	NA
6	76028101	76028200	1	1	0.166667	0.333333	0.272727	NA	0	bravoBC_high	0	0	0	0	0	0	0	NA	overlap	NA
7	74076101	74076200	1	1	0	0.333333	0.5	NA	0	bravoBC_high	0	0	0	0	0	0	0	NA	overlap	NA
8	31207901	31208000	1	1	0.25	0.2	0.5	NA	0.25	bravoBC_high	0	0	0	0	0	0	0	NA	overlap	NA
8	157489201	157489300	1	1	0.333333	0	NA	NA	0	bravoBC_high	0	0	0	0	0	0	0	NA	overlap	NA
9	105207001	105207100	0.62619	0.75265	0.0144928	0	0	0.0188679	0.0224719	bravoBC_high	32	29	2	0	1	0	5	NA	NA	overlap
9	105139901	105140000	0.938303	0.89011	0.015873	0	0.0555556	0.368421	0.0606061	bravoBC_high	2	0	0	0	0	0	0	NA	NA	overlap
1	3108801	3108900	0.65736	0.626113	0.0238095	0	0.217391	0.206897	0	bravoBC_high	71	54	0	1	0	3	2	overlap	NA	overlap
1	3109301	3109400	0.733397	0.688372	0.0397727	0.0736842	0.209302	0.0130719	0.0107527	bravoBC_high	131	106	3	1	2	2	3	overlap	NA	overlap
1	3108501	3108600	0.790409	0.775342	0.0125	0	0.244898	0.0352941	0	bravoBC_high	0	0	0	0	0	0	0	overlap	NA	overlap
1	3108601	3108700	0.816667	0.804511	0	0.0952381	0.4	0.117647	0.025641	bravoBC_high	6	2	0	0	1	0	0	overlap	NA	overlap
1	3109201	3109300	0.8825	0.817726	0.0151515	0.106061	0.388889	0	0.00990099	bravoBC_high	101	83	4	0	2	2	2	overlap	NA	overlap
1	3108701	3108800	0.86943	0.850679	0	0.0754717	0.114754	0.0277778	0.0512821	bravoBC_high	40	27	0	2	1	3	1	overlap	NA	overlap
5	101960401	101960500	0.798289	0.752608	0.0694444	0	0.0181818	0.0909091	0	bravoBC_high	27	23	1	0	0	0	0	NA	overlap	overlap
5	101960101	101960200	0.801724	0.755196	0.0117647	0.1	0	0	0	bravoBC_high	75	72	0	0	2	0	2	NA	overlap	overlap
5	101959101	101959200	0.783133	0.776316	0	0.153846	0	0	0	bravoBC_high	0	0	0	0	0	0	0	NA	overlap	overlap
5	101960501	101960600	0.788515	0.798413	0.164706	0	0	0	0.02	bravoBC_high	1	1	0	0	0	0	0	NA	overlap	overlap
5	101960201	101960300	0.849438	0.762687	0.00704225	0.0625	0.015625	0.103448	0	bravoBC_high	95	62	1	0	1	0	1	NA	overlap	overlap
5	101960901	101961000	0.815085	0.81201	0	0	0	0	0	bravoBC_high	82	55	0	0	0	0	1	NA	overlap	overlap
5	101961001	101961100	0.834327	0.798473	0	0	0.0138889	0	0	bravoBC_high	68	47	0	0	0	0	3	NA	overlap	overlap
5	101959301	101959400	0.832442	0.801802	0.0519481	0	0.111111	0.107143	0	bravoBC_high	0	0	0	0	0	0	0	NA	overlap	overlap
5	101960301	101960400	0.883475	0.9	0.0581395	0	0.151515	0.166667	0	bravoBC_high	84	52	2	0	0	0	0	NA	overlap	overlap
4	127540001	127540100	0	0	0.666667	1	NA	0.4	0.777778	bravoBC_low	4	0	1	1	2	0	0	NA	NA	NA
6	128113201	128113300	0	0	0.875	0.8	0.5	0.444444	0.8	bravoBC_low	3	1	0	2	1	2	2	NA	NA	NA
8	10552901	10553000	0	0	0.75	0.666667	1	0.444444	0.666667	bravoBC_low	0	0	0	0	0	0	0	NA	NA	NA
3	93900901	93901000	0	0	0.666667	0.777778	1	0.5	0.666667	bravoBC_low	0	2	0	0	2	1	1	NA	NA	NA
1	141263101	141263200	0	0	1	0.666667	1	0.5	1	bravoBC_low	0	3	1	2	0	1	1	NA	NA	NA
6	135239001	135239100	0	0	0.8	1	1	0.5	0.666667	bravoBC_low	0	0	0	0	0	0	0	NA	NA	NA
2	181928901	181929000	0	0	0.75	1	NA	0.5	0.714286	bravoBC_low	0	0	2	2	0	1	2	NA	NA	NA
1	123592001	123592100	0	0	0.6	1	0.666667	0.571429	0.8	bravoBC_low	0	0	0	0	0	0	0	NA	NA	NA
7	25891601	25891700	0	0	0.6	1	1	0.571429	0.666667	bravoBC_low	0	0	0	0	0	0	0	NA	NA	NA
7	7486401	7486500	0	0	0.733333	0.6	NA	0.666667	0.714286	bravoBC_low	0	0	0	0	0	0	0	NA	NA	NA
10	59309101	59309200	0	0	0.714286	1	1	0.75	0.8	bravoBC_low	1	0	3	1	1	0	0	NA	NA	NA
7	37288501	37288600	0	0	0.666667	0.625	0.5	0.8	0.75	bravoBC_low	0	0	0	0	0	0	0	NA	NA	NA
2	237145801	237145900	0.00660066	0	0.744186	0.717949	0.759542	0.538462	0.793103	bravoBC_low	0	0	0	0	0	0	0	NA	NA	NA
2	237087201	237087300	0.0155039	0	0.73913	0.764706	0.928571	0.833333	0.833333	bravoBC_low	5	4	0	0	0	0	0	NA	NA	NA
2	237145701	237145800	0.00396825	0.015625	0.675676	0.785714	0.745	0.74359	0.638298	bravoBC_low	0	0	0	0	0	0	0	NA	NA	NA
1	41031501	41031600	0.0178571	0.0229885	0.875	1	0.8125	0.714286	0.769231	bravoBC_low	0	0	0	0	0	0	0	NA	NA	NA
5	3270701	3270800	0.0305927	0.0277778	0.759259	0.809091	0.702128	0.734694	0.808511	bravoBC_low	0	0	0	0	0	0	0	NA	NA	NA
5	3267001	3267100	0.0233813	0.0358974	0.892857	0.956897	0.833333	0.935484	0.78	bravoBC_low	10	11	0	3	0	0	0	NA	NA	NA
6	151380201	151380300	0.0625	0	1	0.8	0.583333	0.5	0.7	bravoBC_low	2	0	3	4	2	1	1	NA	NA	NA
2	109121701	109121800	0.0398936	0.0247525	0.716667	0.745098	0.647059	0.75	0.734694	bravoBC_low	14	16	1	2	1	1	0	NA	NA	NA
5	3265801	3265900	0.0299145	0.0447284	0.841463	0.911565	0.934426	0.779661	0.828571	bravoBC_low	0	0	0	0	0	0	0	NA	NA	NA
5	3265701	3265800	0.0175439	0.0623229	0.722222	0.88764	0.625	0.857143	0.714286	bravoBC_low	0	0	0	0	0	0	0	NA	NA	NA
5	3270801	3270900	0.0632184	0.0174672	0.819672	0.844156	0.586957	0.583333	0.705882	bravoBC_low	0	0	0	0	0	0	0	NA	NA	NA
5	3274201	3274300	0.0390173	0.0426136	0.794118	0.744681	0.8125	0.882353	0.741935	bravoBC_low	0	0	0	0	0	0	0	NA	NA	NA
5	3270601	3270700	0.04811	0.0361446	0.857143	0.792453	0.722222	0.948718	0.857143	bravoBC_low	0	0	0	0	0	0	0	NA	NA	NA
5	3270501	3270600	0.0379061	0.0483461	0.912281	0.700787	0.621622	0.885714	0.69697	bravoBC_low	13	6	1	3	0	0	2	NA	NA	NA
7	141172601	141172700	0.0397456	0.0514706	0.879121	0.698925	0.819876	0.771429	0.722892	bravoBC_low	0	3	0	1	1	0	0	NA	NA	NA
5	3268201	3268300	0.06814	0.0247934	0.777778	0.863309	0.55814	0.787879	0.84	bravoBC_low	14	9	0	2	0	0	0	NA	NA	NA
5	3266901	3267000	0.0395137	0.0558659	0.886076	0.798969	0.746479	0.809524	0.828283	bravoBC_low	7	3	0	1	0	0	0	NA	NA	NA
5	3271801	3271900	0.0635417	0.0337302	0.693069	0.695946	0.705128	0.644737	0.714286	bravoBC_low	0	0	0	0	0	0	0	NA	NA	NA
5	3271901	3272000	0.0716981	0.025641	0.734694	0.731707	0.8	0.636364	0.803922	bravoBC_low	0	0	0	0	0	0	0	NA	NA	NA
4	226702601	226702700	0.1	0	0.75	1	0.833333	1	0.777778	bravoBC_low	3	0	3	1	1	3	1	NA	NA	NA
5	3265601	3265700	0.0204327	0.0823045	0.870588	0.808333	0.56	0.875	0.75	bravoBC_low	0	0	0	0	0	0	0	NA	NA	NA
5	3267601	3267700	0.0372671	0.0666667	0.818182	0.833333	0.916667	0.789474	0.857143	bravoBC_low	0	0	0	0	0	0	0	NA	NA	NA
5	3270001	3270100	0.0616114	0.0535117	0.837838	0.75	0.62069	0.785714	0.78125	bravoBC_low	0	0	0	0	0	0	0	NA	NA	NA
5	95230901	95231000	0.0351562	0.0820896	0.911765	0.877551	0.571429	1	0.769231	bravoBC_low	0	0	0	0	0	0	0	NA	NA	NA
5	3266601	3266700	0.0536585	0.0663507	0.8	0.862385	0.842857	0.907407	0.93617	bravoBC_low	0	0	0	0	0	0	0	NA	NA	NA
5	3265401	3265500	0.0881356	0.0337079	0.875	0.808511	0.84375	0.736842	0.814815	bravoBC_low	0	0	0	0	0	0	0	NA	NA	NA
5	3267901	3268000	0.0483384	0.073991	0.851485	0.835938	0.877193	0.864407	0.675676	bravoBC_low	0	0	0	0	0	0	0	NA	NA	NA
1	74133901	74134000	0	0.125	0.783784	0.861111	0.5	0.895833	0.810811	bravoBC_low	1	1	0	1	2	3	1	NA	NA	NA
5	3267401	3267500	0.066129	0.0627306	0.706667	0.779528	0.698413	0.775862	0.716418	bravoBC_low	0	0	0	0	0	0	0	NA	NA	NA
5	3266301	3266400	0.0519481	0.0772358	0.741935	0.695122	0.736842	0.8	0.825	bravoBC_low	0	0	0	0	0	0	0	NA	NA	NA
5	3265901	3266000	0.0613208	0.0797101	0.733333	0.765957	0.970588	0.882353	0.75	bravoBC_low	0	0	0	0	0	0	0	NA	NA	NA
5	3267701	3267800	0.0626151	0.0842697	0.894737	0.818182	0.9	0.84375	0.910448	bravoBC_low	0	0	0	0	0	0	0	NA	NA	NA
5	95232101	95232200	0.0590476	0.0981818	0.821429	0.860606	0.830769	0.972222	0.744186	bravoBC_low	0	0	0	0	0	0	0	NA	NA	NA
5	3274101	3274200	0.0677083	0.0895522	0.85	0.92	1	0.956522	0.814815	bravoBC_low	0	0	0	0	0	0	0	NA	NA	NA
5	95232801	95232900	0.0556701	0.103679	0.859649	0.726562	0.657143	0.914894	0.719512	bravoBC_low	0	0	0	0	0	0	0	NA	NA	NA
5	3271701	3271800	0.0920635	0.0711974	0.844828	0.72549	0.822222	0.666667	0.803922	bravoBC_low	0	0	0	0	0	0	0	NA	NA	NA
5	3268101	3268200	0.0535714	0.119266	0.902439	0.939394	0.764706	0.875	0.894737	bravoBC_low	14	9	0	2	0	0	0	NA	NA	NA
4	33252001	33252100	0.0782918	0.105469	0.940299	0.848485	0.874459	0.804598	0.865979	bravoBC_low	0	0	0	0	0	0	0	NA	NA	NA
5	3266401	3266500	0.0844391	0.101562	0.861538	0.849741	0.731343	0.849462	0.957143	bravoBC_low	8	11	1	0	0	0	1	NA	NA	NA
5	3268001	3268100	0.0724299	0.115702	0.871795	0.931818	0.878788	0.933333	0.93617	bravoBC_low	0	0	0	0	0	0	0	NA	NA	NA
5	3266101	3266200	0.13522	0.0776699	0.785714	0.931034	0.714286	0.84375	0.759259	bravoBC_low	1	0	0	0	0	0	0	NA	NA	NA
1	271473801	271473900	0.115385	0.097561	0.8	0.719298	0.916667	0.785714	0.736842	bravoBC_low	13	17	0	6	1	0	3	NA	NA	NA
10	102050401	102050500	0.25	0	0.875	1	1	0.857143	1	bravoBC_low	1	1	1	1	0	2	1	NA	NA	NA
5	3267801	3267900	0.102778	0.172043	0.790123	0.88764	0.818182	1	0.947368	bravoBC_low	0	0	0	0	0	0	0	NA	NA	NA
1	271474501	271474600	0.164706	0.11811	0.838095	0.817204	0.810811	0.875	0.802469	bravoBC_low	13	9	1	11	2	2	2	NA	NA	NA
1	271473401	271473500	0.0888889	0.202873	0.82029	0.823988	0.899083	0.840909	0.87234	bravoBC_low	19	21	6	19	2	1	3	NA	NA	NA
7	18594701	18594800	0.112903	0.181818	1	1	0.777778	0.75	1	bravoBC_low	0	0	0	0	3	0	0	NA	NA	NA
1	271473601	271473700	0.118257	0.186992	0.82716	0.836683	0.791667	0.888	0.850746	bravoBC_low	38	34	7	29	7	2	7	NA	NA	NA
9	105142701	105142800	0.140794	0.168224	0.79661	0.84375	0.769231	0.913043	0.826087	bravoBC_low	24	15	1	2	0	1	0	NA	NA	NA
4	33251901	33252000	0.182353	0.12766	0.863014	0.961538	0.906542	0.892308	0.963636	bravoBC_low	0	0	0	0	0	0	0	NA	NA	NA
3	113706201	113706300	0.333333	0	1	1	NA	0.6	1	bravoBC_low	0	0	0	0	0	0	0	NA	NA	NA
4	33252601	33252700	0.178571	0.177966	0.879518	0.838384	0.787879	0.909091	0.854839	bravoBC_low	0	0	0	0	0	0	0	NA	NA	NA
5	3271601	3271700	0.246377	0.207547	0.866667	0.941176	0.641026	0.833333	0.948718	bravoBC_low	0	0	0	0	0	0	0	NA	NA	NA
9	79533701	79533800	0.333333	0.333333	1	1	NA	NA	1	bravoBC_low	0	0	0	0	0	0	0	NA	NA	NA
10	34544601	34544700	0.0474138	0.0403226	0.93617	0.867925	0.897959	0.728571	0.764706	bravoBC_low	0	0	0	0	0	0	0	overlap	NA	NA
5	3269601	3269700	0.0283843	0.0647482	0.793651	0.818182	0.8	0.681818	0.794872	bravoBC_low	0	0	0	0	0	0	0	overlap	NA	NA
10	34543601	34543700	0.0564972	0.0402685	0.897436	0.666667	0.722222	0.677419	0.666667	bravoBC_low	0	0	0	0	0	0	0	overlap	NA	NA
2	111281701	111281800	0.0287206	0.0764526	0.862069	0.931034	NA	0.71875	0.888889	bravoBC_low	0	0	0	0	0	0	0	overlap	NA	NA
10	34544701	34544800	0.0508287	0.0607345	0.771084	0.951807	0.811688	0.917431	0.73913	bravoBC_low	0	0	0	0	0	0	0	overlap	NA	NA
1	271489601	271489700	0.0760095	0.0362903	0.681319	0.785714	0.68	0.772727	0.789474	bravoBC_low	0	0	0	0	0	0	0	overlap	NA	NA
10	34548301	34548400	0.0656934	0.0647482	0.829268	0.88	0.933333	0.833333	0.675676	bravoBC_low	0	0	0	0	0	0	0	overlap	NA	NA
10	34543701	34543800	0.0840708	0.0482759	0.945946	0.764706	0.708333	0.833333	0.904762	bravoBC_low	1	0	0	1	0	0	0	overlap	NA	NA
10	107481701	107481800	0.0424028	0.0952381	0.857143	0.87234	1	0.745455	0.821429	bravoBC_low	0	0	0	0	0	0	0	overlap	NA	NA
10	34547801	34547900	0.0577508	0.0894737	0.870968	0.965517	1	0.952381	0.84	bravoBC_low	0	0	0	0	2	0	0	overlap	NA	NA
9	104994201	104994300	0.107143	0.0422535	0.789474	0.882353	0.83871	0.842105	0.969697	bravoBC_low	0	1	0	0	0	0	0	overlap	NA	NA
1	191481201	191481300	0.0929204	0.0641026	0.784615	0.736842	0.785714	0.756098	0.75	bravoBC_low	0	1	1	0	2	0	0	overlap	NA	NA
2	237088001	237088100	0.0916905	0.0734463	0.86	0.746269	0.821429	0.837209	0.72	bravoBC_low	0	0	0	1	0	0	0	overlap	NA	NA
10	34544401	34544500	0.0807175	0.0970149	0.977273	0.857143	0.789474	0.766667	0.885246	bravoBC_low	0	0	0	0	0	0	0	overlap	NA	NA
10	34547901	34548000	0.12766	0.0628272	0.87234	0.897436	0.813953	0.75	0.775	bravoBC_low	0	0	0	0	2	0	0	overlap	NA	NA
10	34544101	34544200	0.0922242	0.112211	0.928571	0.806452	0.835443	0.811765	0.890411	bravoBC_low	0	0	0	0	0	0	0	overlap	NA	NA
9	105158501	105158600	0.104895	0.117647	0.789474	0.881579	0.896552	0.921053	0.914894	bravoBC_low	37	31	3	4	8	2	1	overlap	NA	NA
10	107481601	107481700	0.110132	0.114035	0.857143	0.764706	0.857143	0.733333	0.828571	bravoBC_low	0	0	0	0	0	0	0	overlap	NA	NA
2	111281601	111281700	0.0676329	0.165017	0.927711	1	NA	0.955056	0.909091	bravoBC_low	0	0	0	0	0	0	0	overlap	NA	NA
9	104993401	104993500	0.147275	0.0894309	0.831933	0.886364	0.72093	0.722222	0.947368	bravoBC_low	0	0	0	0	0	0	0	overlap	NA	NA
10	34544201	34544300	0.141593	0.170732	0.895833	0.785714	0.891892	0.902439	0.88	bravoBC_low	0	0	0	0	0	0	0	overlap	NA	NA
10	34544301	34544400	0.159341	0.186207	1	0.933333	0.975	0.843137	0.87037	bravoBC_low	0	0	0	0	0	0	0	overlap	NA	NA
1	133558501	133558600	0	0	0.666667	0.6	0.923077	0.4	0.625	bravoBC_low	0	0	0	0	0	0	0	NA	overlap	NA
3	19831501	19831600	0	0	0.833333	0.8	0.444444	0.5	0.625	bravoBC_low	0	0	0	0	0	0	0	NA	overlap	NA
2	37193601	37193700	0	0	0.6	0.75	0.5	0.5	0.6	bravoBC_low	0	0	0	0	0	0	0	NA	overlap	NA
2	107226101	107226200	0	0	0.8	0.833333	0.6	0.5	0.777778	bravoBC_low	0	0	0	0	0	0	0	NA	overlap	NA
1	206039701	206039800	0	0	0.6	1	0.636364	0.5	1	bravoBC_low	0	0	0	0	0	0	0	NA	overlap	NA
3	186074101	186074200	0	0	0.666667	0.6	0.666667	0.5	1	bravoBC_low	0	0	0	0	0	0	0	NA	overlap	NA
2	95561301	95561400	0	0	0.833333	0.833333	0.428571	0.555556	0.636364	bravoBC_low	0	0	0	0	0	0	0	NA	overlap	NA
2	58778001	58778100	0	0	0.9	0.666667	0.5	0.571429	0.857143	bravoBC_low	0	0	0	0	0	1	0	NA	overlap	NA
2	237079201	237079300	0	0	0.790698	0.684211	0.634146	0.65625	0.829787	bravoBC_low	10	5	0	0	0	0	0	NA	overlap	NA
9	105074001	105074100	0	0	0.708333	0.76	0.5	0.666667	0.642857	bravoBC_low	0	0	0	0	0	0	0	NA	overlap	NA
4	5693301	5693400	0	0	0.75	0.666667	0.6	0.666667	0.6	bravoBC_low	0	0	0	0	0	0	0	NA	overlap	NA
2	219166701	219166800	0	0	0.777778	1	0.75	0.666667	0.666667	bravoBC_low	0	0	0	0	0	0	0	NA	overlap	NA
7	75416901	75417000	0	0	0.75	0.666667	0.833333	0.666667	0.666667	bravoBC_low	0	0	0	0	1	0	0	NA	overlap	NA
7	89321801	89321900	0	0	0.615385	1	1	0.666667	0.727273	bravoBC_low	0	0	0	0	0	0	0	NA	overlap	NA
2	53207101	53207200	0	0	0.625	0.666667	1	0.666667	0.75	bravoBC_low	0	0	0	0	0	0	0	NA	overlap	NA
9	105088801	105088900	0	0	0.809524	0.842105	NA	0.666667	0.869565	bravoBC_low	0	1	1	1	0	0	2	NA	overlap	NA
9	105073101	105073200	0	0	0.725	0.790698	0.647059	0.736842	0.891892	bravoBC_low	0	0	0	0	0	0	0	NA	overlap	NA
6	91509101	91509200	0	0	0.8	0.75	0.5	0.75	1	bravoBC_low	0	0	0	0	0	0	0	NA	overlap	NA
1	84274101	84274200	0	0	0.666667	0.833333	1	0.75	1	bravoBC_low	0	0	0	0	0	0	0	NA	overlap	NA
2	237082201	237082300	0	0	0.862745	0.733333	0.5625	0.754386	0.755556	bravoBC_low	0	0	0	0	0	1	0	NA	overlap	NA
9	105076501	105076600	0	0	0.851852	0.727273	NA	0.764706	0.75	bravoBC_low	0	0	0	0	0	0	0	NA	overlap	NA
9	105074401	105074500	0	0	0.65	0.727273	0.75	0.791667	0.833333	bravoBC_low	0	0	0	0	0	0	0	NA	overlap	NA
9	105071801	105071900	0	0	0.714286	0.888889	NA	0.8	0.685714	bravoBC_low	0	1	0	0	0	0	0	NA	overlap	NA
9	105088701	105088800	0	0	0.782609	0.875	NA	0.8	0.615385	bravoBC_low	0	1	1	2	0	0	6	NA	overlap	NA
5	108670901	108671000	0	0	0.6	0.653846	0.833333	0.9	0.857143	bravoBC_low	0	0	0	0	0	0	0	NA	overlap	NA
2	237084401	237084500	0	0	0.797101	0.658824	0.75	0.921569	0.857143	bravoBC_low	7	9	0	0	0	0	0	NA	overlap	NA
2	74195601	74195700	0	0	0.75	1	0.5	1	0.75	bravoBC_low	0	1	0	0	0	1	0	NA	overlap	NA
10	25189701	25189800	0	0	0.8	1	0.5	1	1	bravoBC_low	0	0	0	0	0	0	0	NA	overlap	NA
8	8060401	8060500	0	0	1	0.666667	0.666667	1	1	bravoBC_low	0	0	0	0	0	0	0	NA	overlap	NA
8	121416501	121416600	0	0	0.75	1	0.666667	1	0.666667	bravoBC_low	0	0	0	0	0	0	0	NA	overlap	NA
7	20417701	20417800	0	0	0.6	0.666667	1	1	0.75	bravoBC_low	0	0	0	0	0	0	0	NA	overlap	NA
6	155499601	155499700	0	0	1	0.666667	1	1	1	bravoBC_low	0	0	0	0	0	0	0	NA	overlap	NA
4	2347301	2347400	0	0	0.875	1	NA	1	0.666667	bravoBC_low	0	0	0	0	0	0	0	NA	overlap	NA
5	200941301	200941400	0	0	0.714286	1	NA	1	1	bravoBC_low	0	0	0	0	0	0	0	NA	overlap	NA
7	83077201	83077300	0	0	0.714286	1	0.5	NA	0.857143	bravoBC_low	0	0	0	0	0	0	0	NA	overlap	NA
5	2841801	2841900	0	0	1	1	1	NA	1	bravoBC_low	0	0	0	0	0	0	0	NA	overlap	NA
9	105077301	105077400	0.0128205	0	0.948718	0.625	0.75	0.769231	1	bravoBC_low	0	1	0	0	0	0	0	NA	overlap	NA
2	237081301	237081400	0.0222222	0	0.716981	0.719298	0.821429	0.633333	0.75	bravoBC_low	0	1	0	0	0	0	0	NA	overlap	NA
9	105085001	105085100	0.037037	0	0.789474	0.823529	NA	0.777778	0.777778	bravoBC_low	0	0	0	0	0	0	0	NA	overlap	NA
2	237080901	237081000	0	0.0454545	0.755102	0.725	0.72973	0.714286	0.701754	bravoBC_low	15	14	0	0	0	0	0	NA	overlap	NA
9	105082001	105082100	0.0526316	0	0.857143	0.833333	NA	0.714286	0.916667	bravoBC_low	0	0	0	0	0	0	0	NA	overlap	NA
10	51159601	51159700	0.0392749	0.0233645	0.652174	0.978723	0.726368	0.95	1	bravoBC_low	6	3	0	2	4	0	0	NA	overlap	NA
6	148261001	148261100	0.0769231	0	0.75	0.714286	1	0.461538	0.777778	bravoBC_low	2	4	0	4	0	0	1	NA	overlap	NA
9	105094301	105094400	0.0909091	0	0.8125	0.769231	NA	0.571429	0.88	bravoBC_low	2	1	1	1	0	0	1	NA	overlap	NA
9	105079501	105079600	0.0215054	0.08	0.742574	0.75	0.777778	0.808511	0.865385	bravoBC_low	1	0	0	0	0	0	0	NA	overlap	NA
9	105063201	105063300	0.0623053	0.0471698	0.836538	0.74359	0.898305	0.769231	0.78125	bravoBC_low	0	0	0	0	0	0	0	NA	overlap	NA
9	105063101	105063200	0.0651558	0.0469484	0.872727	0.85	0.606061	0.909091	0.678571	bravoBC_low	1	3	0	0	0	0	0	NA	overlap	NA
2	237083101	237083200	0.0384615	0.104651	0.865672	0.810811	0.583333	0.87234	0.72	bravoBC_low	0	0	0	0	0	0	0	NA	overlap	NA
9	105075601	105075700	0.125	0.0625	0.9	1	NA	0.571429	0.863636	bravoBC_low	0	0	0	0	0	0	0	NA	overlap	NA
10	51159501	51159600	0.0321285	0.165605	0.820513	0.84	0.819444	0.827586	0.863636	bravoBC_low	0	0	0	0	0	0	0	NA	overlap	NA
6	83347001	83347100	0.2	0	0.875	0.8	0.545455	0.625	1	bravoBC_low	0	0	0	0	0	0	0	NA	overlap	NA
7	87976901	87977000	0.208333	0	0.923077	0.875	NA	NA	0.888889	bravoBC_low	0	0	0	0	0	0	0	NA	overlap	NA
1	214574901	214575000	0.172507	0.0882353	0.960396	0.880952	0.847826	0.935484	0.9	bravoBC_low	0	0	0	0	0	0	0	NA	overlap	NA
7	181410201	181410300	0.111111	0.15	0.894737	0.909091	NA	0.882353	0.777778	bravoBC_low	1	2	1	0	0	1	1	NA	overlap	NA
1	238100001	238100100	0.333333	0	1	1	1	1	1	bravoBC_low	0	0	0	0	0	0	0	NA	overlap	NA
9	144570001	144570100	0.333333	0	1	1	NA	NA	1	bravoBC_low	0	0	0	0	0	0	0	NA	overlap	NA
1	172688801	172688900	0.25	0.333333	1	1	1	1	1	bravoBC_low	0	0	0	0	0	0	0	NA	overlap	NA
9	105062101	105062200	0.0490566	0.0325581	0.754545	0.716216	0.877193	0.7	0.755556	bravoBC_low	0	0	0	0	0	0	0	overlap	overlap	NA
10	34553401	34553500	0.0631912	0.0421546	0.836066	0.821918	0.862069	0.833333	0.848485	bravoBC_low	0	3	0	1	0	2	1	overlap	overlap	NA
10	34553001	34553100	0.0643087	0.07	0.857143	0.97619	0.907407	0.75	0.90625	bravoBC_low	0	0	0	0	1	0	0	overlap	overlap	NA
10	34553101	34553200	0.0833333	0.0985222	0.814815	0.875	0.843137	0.864407	0.888889	bravoBC_low	0	0	0	0	0	0	0	overlap	overlap	NA
7	181413001	181413100	0.125	0.0833333	1	0.85	NA	1	0.761905	bravoBC_low	4	1	0	0	0	0	0	overlap	overlap	NA
10	34552101	34552200	0.0506024	0.167139	0.794118	0.903226	0.928571	0.904762	0.914894	bravoBC_low	0	0	0	0	0	0	0	overlap	overlap	NA
2	237123301	237123400	0.0345964	0.026694	0.727273	0.714286	0.75	0.625	0.707317	bravoBC_low	66	48	3	0	2	0	3	overlap	NA	overlap
2	111263201	111263300	0.141935	0.226667	0.943662	0.95	NA	0.888889	0.929825	bravoBC_low	2	2	0	0	0	0	0	overlap	NA	overlap
9	105066201	105066300	0.00473934	0.0236686	0.863636	0.916667	0.75	0.875	0.826087	bravoBC_low	59	41	2	0	1	3	0	overlap	overlap	overlap
9	105066901	105067000	0.0290758	0.0153846	0.75	0.795699	0.69697	0.757143	0.776596	bravoBC_low	71	61	2	2	3	0	2	overlap	overlap	overlap
9	105061901	105062000	0.047619	0.05	0.805825	0.833333	0.625	0.753086	0.865385	bravoBC_low	0	0	0	0	0	0	0	overlap	overlap	overlap
9	105068601	105068700	0.0473538	0.0753425	0.727273	0.777778	0.75	0.756757	0.785714	bravoBC_low	0	1	0	0	0	0	0	overlap	overlap	overlap
9	105065001	105065100	0.0731261	0.0503597	0.893939	0.769231	0.836735	0.755556	0.862069	bravoBC_low	53	38	2	2	4	1	3	overlap	overlap	overlap
9	105066501	105066600	0.0932642	0.0344828	0.702479	0.780822	0.674699	0.717949	0.8	bravoBC_low	65	69	0	0	0	1	5	overlap	overlap	overlap
9	105067601	105067700	0.0756014	0.0777778	0.895522	0.761905	0.666667	0.947368	0.860465	bravoBC_low	2	1	0	1	0	0	0	overlap	overlap	overlap
9	105067701	105067800	0.105727	0.0608696	0.830508	0.8	1	0.916667	0.914286	bravoBC_low	0	0	0	0	0	0	0	overlap	overlap	overlap
9	105065101	105065200	0.111693	0.0933014	0.896552	0.752577	0.725664	0.8	0.842857	bravoBC_low	20	12	1	2	5	2	5	overlap	overlap	overlap

## Sheet: S9
Table S9: Differentially sRNAs generation loci identified in W22 genome between the sickly plants and normal plants using DESeq2 (FDR < 0.05 & fold change > 1.5).
loci	sRNA_size_procuded	log2FoldChange	FDR	Blanco_BC1_1671-3-2	Blanco_BC6_3780-3-1	Blanco_BC6_3805-3-2	Blanco_teosinte_M63-2-1	Bravo_teosinte_M64-3-2	Bravo_teosinte_M64-5-1	Maize-41168-W22-1-2	Maize-41168-W22-4-2	Bravo_BC1_1653-1-1	Bravo_BC6_3771-4-2	Bravo_BC6_3772-1-2
chr1_6217	21-nt	10.7171	3.37669e-13	0	0	0	0	0	0	0	0	65.5021	96.3496	72.2529
chr1_6218	21-nt	9.72959	5.801e-16	0	0	0	0	0.407624	0	0	0	62.4196	89.0248	73.5839
chr1_121509	21-nt	8.60224	3.14908e-07	0	0	0	0	0	0	0	0	10.4033	24.7917	14.2604
chr1_195299	21-nt	-2.48826	0.00410088	10.8716	7.44441	5.89366	22.6946	31.3871	31.2034	22.6145	27.6152	2.69714	3.38069	3.99292
chr1_227484	21-nt	9.03246	5.4609e-08	0	0	0	0	0	0	0	0	39.3013	25.3552	7.98584
chr1_227485	21-nt	8.7717	1.16632e-07	0	0	0	0	0	0	0	0	23.5037	21.6927	10.6478
chr1_234867	21-nt	10.244	1.29858e-11	0	0	0	0	0	0	0	0	66.658	61.4158	37.2673
chr1_289266	21-nt	6.86646	0.00447104	0	0	0	0	0	0	0	0	0	17.1852	6.65487
chr1_293814	21-nt	9.41804	1.17589e-08	0	0	0	0	0	0	0	0	30.8245	63.1062	8.17598
chr1_293815	21-nt	7.29253	0.00066302	0	0	0	0	0	0	0	0	0.385306	19.439	5.51404
chr1_305239	21-nt	6.13165	0.00640212	0	0	0	0	0.407624	0	0	0	21.1919	0	9.6971
chr1_321580	21-nt	11.3766	7.71807e-15	0	0	0	0	0	0	0	0	191.497	171.288	60.2741
chr1_330923	21-nt	8.26706	2.07234e-06	0	0	0	0	0	0	0	0	12.7151	19.1572	7.22529
chr1_330970	21-nt	9.07589	2.95341e-08	0	0	0	0	0	0	0	0	16.5682	41.6951	14.0703
chr1_330971	21-nt	6.62341	0.0044042	0	0	0	0	0	0	0	0	0.385306	3.94414	10.6478
chr1_358273	21-nt	7.55221	1.58659e-09	0	0	0	0	0.815248	0	0	0	18.4947	34.3703	27.1899
chr1_358274	21-nt	9.97563	2.29175e-16	0	0	0	0	0.407624	0	0	0	58.5666	127.903	91.8372
chr1_431083	21-nt	-3.08257	0.00357825	6.56827	7.72013	4.91138	1.62104	4.07624	7.31329	6.86511	9.36109	0	0.845172	0.950696
chr1_431084	21-nt	-2.17619	0.00163501	8.6067	11.0288	9.82276	6.48416	6.92961	12.6764	14.1341	15.4458	1.54123	3.38069	1.90139
chr1_431087	21-nt	-3.46205	0.00320794	4.52984	4.13578	2.21012	3.64734	2.85337	4.38797	5.65362	6.08471	0	0.281724	0.570417
chr1_448301	21-nt	8.64122	1.76327e-05	0	0	0	0	0	0	0	0	40.8425	0	56.8516
chr1_448302	21-nt	9.94618	2.60639e-10	0	0	0	0	0	0	0	0	26.2008	84.7989	30.6124
chr1_509259	21-nt	9.81701	1.37527e-09	0	0	0	0	0	0	0	0	12.7151	87.8979	36.6969
chr1_531194	21-nt	6.40193	0.0045619	0	0	0	0	0	0	0	0	2.69714	4.78931	3.23237
chr1_564399	21-nt	6.05702	0.000714674	0	0	0	0	0.407624	0	0	0	3.08245	7.88827	7.22529
chr1_618283	21-nt	-4.78517	0.0045619	5.43581	4.4115	3.9291	2.83682	0.815248	5.60686	3.23064	3.27638	0	0	0.190139
chr10_49271	21-nt	8.54025	2.0776e-05	0	0	0	0	0	0	0	0	0	52.6824	34.225
chr10_49272	21-nt	6.90232	0.00236543	0	0	0	0	0	0	0	0	0.385306	16.6217	2.47181
chr10_151538	21-nt	7.13316	0.000339822	0	0	0	0	0	0	0	0	5.00898	6.47965	5.70417
chr10_151539	21-nt	9.36289	2.99858e-09	0	0	0	0	0	0	0	0	27.3568	21.6927	35.1757
chr10_240292	21-nt	10.8351	1.79586e-13	0	0	0	0	0	0	0	0	65.5021	80.8548	112.562
chr10_240302	21-nt	7.75157	0.000340001	0	0	0	0	0	0	0	0	0	24.2283	21.2956
chr2_77582	21-nt	10.8871	9.75219e-14	0	0	0	0	0	0	0	0	75.9054	103.674	85.9429
chr2_359311	21-nt	7.94423	9.29408e-06	0	0	0	0	0	0	0	0	14.2563	7.88827	8.36612
chr2_404707	21-nt	7.80029	1.82107e-05	0	0	0	0	0	0	0	0	6.1649	10.4238	10.8379
chr2_407457	21-nt	7.35853	0.00117457	0	0	0	0	0	0	0	0	0	25.0734	9.31682
chr2_407458	21-nt	6.57457	0.00929761	0	0	0	0	0	0	0	0	0	15.2131	4.3732
chr2_474128	21-nt	6.23719	0.0075574	0	0	0	0	0	0	0	0	2.31184	4.50758	2.85209
chr3_16971	21-nt	-2.60158	0.00547103	7.92723	5.23866	3.9291	8.51046	6.92961	2.68154	10.9034	11.2333	0.770613	1.1269	1.33097
chr3_47855	21-nt	6.84911	0.0010503	0	0	0	0	0	0	0	0	3.85306	6.76137	3.80278
chr3_116785	21-nt	8.16743	2.4772e-06	0	0	0	0	0	0	0	0	12.7151	10.1421	12.1689
chr3_313527	21-nt	8.49856	1.04449e-10	0	0	0.245569	0	0	0	0	0	44.3102	22.5379	25.0984
chr3_437072	21-nt	-2.16201	0.00224642	8.15372	15.716	11.0506	5.26838	15.4897	10.4824	14.1341	14.5097	1.92653	1.97207	3.61264
chr3_437090	21-nt	-2.96599	0.00104507	9.28618	5.79009	9.08605	8.1052	7.74486	5.85063	8.0766	5.61665	0	2.25379	0.380278
chr3_437092	21-nt	-3.00081	3.56986e-09	17.8929	24.539	21.6101	12.9683	28.9413	24.3776	28.6719	29.0194	3.85306	1.97207	2.85209
chr3_471101	21-nt	9.49177	1.62058e-09	0	0	0	0	0	0	0	0	25.4302	43.1038	25.0984
chr3_471102	21-nt	9.72317	5.23217e-10	0	0	0	0	0	0	0	0	23.5037	54.6544	35.1757
chr4_49895	21-nt	2.98759	0.00168668	0.905969	1.10288	0.982276	2.0263	0	1.70643	0.80766	0.936109	13.871	8.16999	5.51404
chr4_49898	21-nt	2.83291	0.00320646	2.71791	2.48147	1.22785	2.43156	0	2.92532	4.0383	1.40416	27.7421	12.1141	9.88724
chr4_49899	21-nt	3.00099	0.00287628	2.03843	3.03291	2.45569	0.40526	0	3.90042	1.21149	2.80833	23.1184	18.3121	11.2182
chr4_49900	21-nt	3.54624	0.000466982	2.03843	2.48147	1.47341	0.40526	0	0.731329	0.40383	0.936109	20.8065	14.3679	7.98584
chr4_60853	21-nt	11.502	1.25424e-15	0	0	0	0	0	0	0	0	114.436	205.94	118.837
chr4_198471	21-nt	9.39922	8.05968e-09	0	0	0	0	0	0	0	0	25.4302	58.3169	12.1689
chr4_329715	21-nt	10.0037	6.46525e-11	0	0	0	0	0	0	0	0	32.751	60.0072	44.6827
chr4_329716	21-nt	7.80125	0.000309425	0	0	0	0	0	0	0	0	0	32.1165	15.7815
chr4_334383	21-nt	10.292	7.13716e-12	0	0	0	0	0	0	0	0	62.0343	55.2179	50.3869
chr4_340645	21-nt	11.0645	3.37669e-13	0	0	0	0	0	0	0	0	221.936	110.718	31.5631
chr4_386789	21-nt	5.33461	0.00997463	0	0	0	0	0	0	0.40383	0	3.08245	3.66241	4.3732
chr4_479064	21-nt	6.41397	0.00442723	0	0	0	0	0	0	0	0	3.46776	4.22586	3.04223
chr5_35079	21-nt	8.56687	1.93079e-05	0	0	0	0	0	0	0	0	0	38.0327	50.577
chr5_181265	21-nt	8.59108	2.05575e-05	0	0	0	0	0	0	0	0	64.3462	0	30.4223
chr5_191260	21-nt	11.3141	7.05326e-15	0	0	0	0	0	0	0	0	82.8409	191.291	112.562
chr5_203920	21-nt	9.0138	2.0126e-08	0	0	0	0	0	0	0	0	23.5037	22.5379	18.4435
chr5_203921	21-nt	9.4119	2.38451e-09	0	0	0	0	0	0	0	0	22.3478	38.5962	26.8096
chr5_271376	21-nt	9.54455	1.66597e-09	0	0	0	0	0	0	0	0	48.5486	17.7486	34.225
chr5_306852	21-nt	7.39168	0.00541663	0	0	0	0	0	0	0	0	0	159.456	98.8724
chr5_306853	21-nt	7.18305	0.0075574	0	0	0	0	0	0	0	0	0	114.943	37.8377
chr5_306854	21-nt	9.36687	8.11129e-09	0	0	0	0	0	0	0	0	46.6221	35.2155	10.6478
chr5_435856	21-nt	5.36965	0.000112982	0.226492	0	0.245569	0	0	0	0.40383	0	6.1649	8.45172	5.89431
chr6_61315	21-nt	8.648	2.00074e-07	0	0	0	0	0	0	0	0	19.6506	19.1572	11.4083
chr6_134942	21-nt	8.43541	1.4112e-06	0	0	0	0	0	0	0	0	24.6596	17.1852	4.94362
chr6_134944	21-nt	9.2761	2.46383e-08	0	0	0	0	0	0	0	0	16.1829	64.7965	10.8379
chr6_222854	21-nt	-6.14884	0.0045619	3.85037	3.86006	6.87593	0	4.07624	3.90042	7.67277	6.08471	0	0	0
chr7_89112	21-nt	6.58834	0.00249834	0	0	0	0	0	0	0	0	4.23837	3.94414	3.80278
chr7_100014	21-nt	7.30085	0.0057189	0	0	0	0	0	0	0	0	0	88.743	60.8445
chr7_232004	21-nt	5.00767	0.00104917	0.226492	0	0.245569	0	0	0	0	0.468054	4.23837	4.78931	7.22529
chr7_254224	21-nt	10.6743	1.5918e-19	0	0	0	0	0.407624	0	0	0	100.95	220.308	145.266
chr7_254225	21-nt	12.5394	1.5918e-19	0	0	0	0	0	0	0	0	227.331	404.556	344.152
chr7_254226	21-nt	9.60901	7.05326e-15	0	0	0	0	0	0.243776	0	0	45.8515	94.0958	65.2177
chr7_351074	21-nt	-3.7654	0.000921229	12.9101	17.646	33.3974	40.526	47.2844	23.1588	20.9992	22.9347	0	0	4.94362
chr8_44652	21-nt	-4.0241	0.00761477	8.38021	11.8559	0.491138	31.6103	39.9472	12.9201	12.9226	1.87222	0.770613	1.40862	0
chr8_172994	21-nt	6.25877	0.00685576	0	0	0	0	0	0	0	0	3.46776	3.38069	2.85209
chr8_182592	21-nt	8.12355	1.21655e-11	0	0	0	0	0.815248	0	0	0	24.6596	46.7662	47.7249
chr8_329806	21-nt	7.46235	0.000931284	0	0	0	0	0	0	0	0	0	29.581	8.17598
chr8_329807	21-nt	8.33552	4.60349e-05	0	0	0	0	0	0	0	0	0	49.3017	24.528
chr9_89503	21-nt	7.96945	1.93079e-05	0	0	0	0	0	0	0	0	17.7241	15.4948	2.09153
chr9_210276	21-nt	10.2178	1.82387e-11	0	0	0	0	0	0	0	0	39.6866	79.4462	44.8728
chr9_210277	21-nt	7.95263	9.29408e-06	0	0	0	0	0	0	0	0	6.55021	14.3679	9.88724
chr9_210279	21-nt	9.54696	1.41279e-09	0	0	0	0	0	0	0	0	23.889	47.8931	26.8096
chr9_210280	21-nt	7.21631	0.0002703	0	0	0	0	0	0	0	0	3.85306	8.16999	6.46473
chr9_212808	21-nt	6.62548	0.00237246	0	0	0	0	0	0	0	0	4.62368	2.53552	5.3239
chr9_232473	21-nt	9.12268	1.40619e-08	0	0	0	0	0	0	0	0	30.8245	25.0734	15.5914
chr9_323986	21-nt	9.09063	1.44772e-08	0	0	0	0	0	0	0	0	19.2653	29.8627	19.7745
chr1_6217	22-nt	12.4682	8.26245e-12	0	0	0	0	0	0	0	0	145.646	156.639	149.259
chr1_6218	22-nt	12.0486	5.42739e-11	0	0	0	0	0	0	0	0	105.574	125.085	100.393
chr1_41851	22-nt	8.83953	4.36037e-05	0	0	0	0	0	0	0	0	9.24735	16.0583	8.36612
chr1_42476	22-nt	-8.18063	0.00390076	25.3671	0.275719	0	16.6157	55.4369	57.5312	0	0	0	0	0
chr1_44742	22-nt	-4.1419	0.00523449	35.3328	23.9875	23.8202	0	16.305	5.36308	23.826	32.2958	1.92653	0	1.14083
chr1_121509	22-nt	10.0825	4.7461e-11	0	0	0	0	0.407624	0	0	0	56.2547	97.1948	61.9854
chr1_227484	22-nt	11.028	1.28087e-08	0	0	0	0	0	0	0	0	89.7764	57.19	17.3027
chr1_227485	22-nt	10.3792	8.56188e-08	0	0	0	0	0	0	0	0	40.8425	34.3703	23.197
chr1_289266	22-nt	7.78222	0.000231677	0	0	0	0	0	0.243776	0	0	0.385306	32.3983	12.5492
chr1_293812	22-nt	10.6272	2.68111e-08	0	0	0	0	0	0	0	0	34.2923	34.3703	48.4855
chr1_293814	22-nt	11.6663	1.65032e-09	0	0	0	0	0	0	0	0	75.5201	169.88	23.0068
chr1_293815	22-nt	8.14341	4.32092e-05	0	0	0	0	0.407624	0	0	0	0.770613	51.2738	13.1196
chr1_305239	22-nt	8.49113	9.18795e-05	0	0	0	0	0.407624	0	0	0	72.4376	0	26.0491
chr1_321579	22-nt	10.7293	1.6358e-06	0	0	0	0	0	0	0	0	0.385306	147.342	17.4928
chr1_321580	22-nt	13.8996	1.48132e-14	0	0	0	0	0	0	0	0	606.858	536.402	218.09
chr1_330923	22-nt	10.2135	2.28207e-07	0	0	0	0	0	0	0	0	29.2833	43.9489	15.4013
chr1_330970	22-nt	10.0306	1.06552e-10	0	0	0	0	0.407624	0	0	0	48.1633	110.718	51.5277
chr1_330971	22-nt	8.53243	0.00123388	0	0	0	0	0	0	0	0	0	9.86034	25.6688
chr1_358273	22-nt	8.91551	2.714e-11	0	0	0	0	1.6305	0.243776	0	0	94.7854	185.656	131.386
chr1_358274	22-nt	12.2473	2.52702e-26	0	0.551438	0	0	0.407624	0	0	0	618.417	1023.78	734.698
chr1_358275	22-nt	8.46207	0.000153572	0	0	0	0	0	0	0	0	8.47674	9.29689	8.17598
chr1_431083	22-nt	-2.84168	4.19327e-07	46.8839	38.0492	27.7493	33.2313	26.4956	43.8797	30.6911	37.4443	3.08245	5.9162	5.51404
chr1_431084	22-nt	-2.7017	8.48653e-09	79.7253	85.1971	67.777	75.7836	57.0674	86.053	92.881	100.164	14.6416	9.29689	12.9295
chr1_431085	22-nt	-2.45263	9.18795e-05	28.085	20.9546	18.6632	23.5051	11.4135	26.0841	21.403	22.4666	3.46776	4.78931	3.4225
chr1_431086	22-nt	-2.93989	0.000425429	34.2003	34.4648	27.0126	19.4525	17.5278	38.5167	37.5562	36.9763	0.385306	3.94414	7.03515
chr1_431087	22-nt	-2.80121	8.86571e-08	68.6271	67.8268	45.1847	59.168	42.3929	52.8995	79.9584	80.5053	10.018	9.86034	6.65487
chr1_431088	22-nt	-3.207	0.000100858	10.6451	9.09872	8.34935	10.942	7.74486	10.4824	7.67277	18.2541	1.15592	1.40862	0.760557
chr1_431089	22-nt	-3.39771	0.000208466	9.96566	13.2345	8.84048	8.91572	4.48386	15.8455	9.69193	6.08471	1.15592	0.563448	0.950696
chr1_448301	22-nt	10.0916	2.45895e-05	0	0	0	0	0	0	0	0	58.5666	0	52.4784
chr1_448302	22-nt	12.1231	1.84977e-10	0	0	0	0	0	0	0	0	49.7045	243.973	78.3373
chr1_483871	22-nt	-4.86838	0.00942594	24.6877	35.0163	1.96455	0	0	5.36308	42.4022	34.636	0.385306	0.281724	0.760557
chr1_483872	22-nt	-4.93912	0.0033328	22.8757	39.7035	18.1721	0	0	26.3278	44.8252	50.0818	0.770613	0.281724	0.950696
chr1_496508	22-nt	8.73223	0.000178053	0	0	0	0	0	0	0	0	0.770613	19.7207	13.8802
chr1_509259	22-nt	11.93	3.05901e-10	0	0	0	0	0	0	0	0	34.2923	166.217	118.457
chr1_531194	22-nt	9.24722	9.42071e-06	0	0	0	0	0	0	0	0	10.7886	18.8755	14.6407
chr1_564399	22-nt	10.9885	6.63793e-09	0	0	0	0	0	0	0	0	33.5217	70.1493	49.8165
chr1_617995	22-nt	-2.88328	0.00236341	9.51267	9.92588	10.5595	25.1261	18.3431	42.6609	9.69193	14.5097	1.54123	1.40862	3.80278
chr1_617996	22-nt	-3.1624	0.000985451	9.05969	7.99584	8.84048	11.7525	31.7947	138.953	8.0766	10.2972	1.15592	1.97207	0.760557
chr1_618282	22-nt	-3.98296	6.91331e-05	18.3459	15.4403	19.8911	4.45786	4.48386	20.721	24.6336	16.85	0.770613	1.69034	0.380278
chr1_618283	22-nt	-3.83564	0.00027951	33.0679	23.4361	25.7847	5.67364	4.89149	50.9493	34.3256	43.5291	1.15592	0.563448	3.61264
chr1_618284	22-nt	-2.78052	0.00116402	46.4309	55.1438	43.4657	25.1261	5.70674	40.2231	49.2673	51.0179	6.93552	6.76137	3.23237
chr1_618285	22-nt	-3.42164	0.00157816	15.175	14.6131	9.08605	6.48416	3.26099	7.80084	19.3839	21.5305	1.15592	1.97207	0.190139
chr1_618294	22-nt	-4.13765	0.000161944	30.8029	22.0575	31.6784	4.0526	6.52198	6.82574	34.7294	26.211	0.385306	2.25379	0.570417
chr1_618295	22-nt	-3.98074	0.00185873	12.9101	14.8888	10.5595	5.26838	0.815248	4.1442	8.48044	22.9347	0.770613	0.845172	0.190139
chr1_618297	22-nt	-3.10948	0.00161414	8.38021	9.65016	5.64809	5.67364	4.89149	17.0643	8.0766	6.55276	1.54123	0.563448	0.760557
chr10_49271	22-nt	10.3486	1.0855e-05	0	0	0	0	0	0	0	0	0	69.5858	63.5065
chr10_49272	22-nt	7.82451	0.000180337	0	0	0	0.40526	0	0	0	0	0.385306	44.5124	8.7464
chr10_151538	22-nt	9.21532	1.02015e-05	0	0	0	0	0	0	0	0	16.5682	15.4948	11.2182
chr10_151539	22-nt	10.3168	1.04377e-11	0	0	0	0	0.407624	0	0	0	97.0972	59.7255	97.5414
chr10_162286	22-nt	-5.79952	0.00881848	9.05969	10.4773	7.1215	0.81052	0.407624	0	14.1341	12.6375	0	0	0.190139
chr10_240292	22-nt	12.9235	1.31268e-12	0	0	0	0	0	0	0	0	173.003	193.826	271.329
chr10_240293	22-nt	7.86518	0.00158313	0	0	0	0	0	0	0	0	1.92653	4.50758	11.7886
chr10_240302	22-nt	8.32964	0.0018826	0	0	0	0	0	0	0	0	0	17.7486	12.9295
chr10_243645	22-nt	-2.74252	0.00596935	31.0294	11.5802	11.5417	36.8787	44.8386	61.1879	14.1341	10.7653	6.55021	1.97207	3.61264
chr10_243646	22-nt	-1.83111	0.00852336	38.2772	19.0246	21.8556	54.3048	51.3606	44.8548	28.2681	36.9763	8.86205	11.5507	10.2675
chr10_243647	22-nt	-1.9572	0.000752394	30.8029	21.2303	17.681	26.3419	22.4193	23.1588	23.4222	29.9555	4.62368	7.0431	6.84501
chr10_259080	22-nt	-4.09991	0.000308398	5.20932	3.58434	5.89366	11.7525	15.8973	23.1588	6.86511	6.55276	0.770613	0.281724	0.570417
chr10_286336	22-nt	-1.94439	0.00813412	20.3843	31.1562	31.924	9.32098	21.1964	24.8652	37.96	29.4874	6.1649	7.60655	6.08445
chr2_6618	22-nt	9.46708	4.09631e-06	0	0	0	0	0	0	0	0	13.871	23.9465	13.8802
chr2_77582	22-nt	11.5701	1.32163e-15	0	0	0	0	0.407624	0	0	0	205.368	230.732	186.717
chr2_250457	22-nt	-2.794	0.00110853	20.6108	18.4732	13.2607	5.26838	12.2287	17.5519	17.3647	33.6999	3.46776	1.40862	2.47181
chr2_359311	22-nt	10.5585	4.51753e-08	0	0	0	0	0	0	0	0	55.4841	27.3272	29.8518
chr2_404707	22-nt	11.1518	3.35363e-09	0	0	0	0	0	0	0	0	36.6041	75.2203	61.0347
chr2_407457	22-nt	9.76281	5.12017e-05	0	0	0	0	0	0	0	0	0	61.6975	24.528
chr2_407458	22-nt	9.01073	0.000393236	0	0	0	0	0	0	0	0	0	40.85	9.50696
chr2_449769	22-nt	-2.63565	0.0094072	14.722	14.8888	10.5595	2.0263	11.8211	15.3579	18.98	15.4458	1.15592	1.1269	3.61264
chr2_449770	22-nt	-2.61853	0.00982286	6.56827	5.51438	7.36707	2.43156	13.044	9.01972	10.4996	8.42498	0.770613	1.97207	0.950696
chr2_449771	22-nt	-2.59699	3.20017e-05	21.7433	22.0575	14.9797	14.9946	21.6041	22.915	22.2107	31.3596	2.69714	4.50758	3.23237
chr2_449787	22-nt	-2.73978	0.00985493	40.9951	38.6006	39.7822	6.0789	10.1906	43.1484	47.2481	51.486	0.770613	7.0431	7.03515
chr3_16822	22-nt	-2.24847	0.00828387	69.9861	31.1562	27.5037	60.789	11.4135	65.8196	69.055	78.6331	12.7151	8.73344	10.6478
chr3_16834	22-nt	-2.94712	0.000163073	19.4783	8.823	7.36707	11.7525	13.044	13.4077	16.9609	16.3819	2.69714	1.40862	1.14083
chr3_16835	22-nt	-2.32362	0.0074898	81.5372	35.5677	41.2556	70.11	11.0058	82.6402	83.5929	99.6956	15.4123	11.269	10.4577
chr3_16969	22-nt	-2.29553	0.00135188	23.3287	13.5102	12.524	19.8577	28.5337	23.8901	25.8451	38.3805	5.7796	5.07103	3.23237
chr3_16970	22-nt	-2.32258	0.000208466	75.8749	36.1192	36.8354	50.2522	110.058	70.4514	71.0741	78.6331	14.6416	12.3959	12.1689
chr3_16971	22-nt	-2.84499	4.16255e-05	61.1529	20.9546	24.0658	44.9839	37.909	22.4274	49.2673	52.8901	4.23837	7.60655	4.18306
chr3_40344	22-nt	-3.37216	0.00585031	3.39738	4.13578	4.66581	5.26838	5.29911	2.68154	5.24979	7.48887	0	0.845172	0.380278
chr3_47855	22-nt	8.48359	6.96151e-07	0	0	0.245569	0	0	0	0	0	19.6506	27.6089	18.4435
chr3_116785	22-nt	10.1707	2.10207e-07	0	0	0	0	0	0	0	0	20.8065	36.9058	26.9998
chr3_116787	22-nt	7.80252	0.00850656	0	0	0	0	0	0	0	0	1.54123	21.6927	0
chr3_295403	22-nt	9.23093	0.000224131	0	0	0	0	0	0	0	0	0	48.4565	10.6478
chr3_313527	22-nt	11.1309	3.35363e-09	0	0	0	0	0	0	0	0	77.0613	43.6672	49.0559
chr3_340362	22-nt	9.48821	3.40674e-06	0	0	0	0	0	0	0	0	15.027	20.0024	17.1125
chr3_401282	22-nt	8.58053	0.00010592	0	0	0	0	0	0	0	0	6.55021	12.9593	8.7464
chr3_410683	22-nt	7.16175	0.00405877	0	0	0	0	0	0.243776	0	0	0	8.45172	23.5773
chr3_437059	22-nt	-4.2533	0.00405877	5.43581	7.44441	4.42024	0.81052	2.44574	4.38797	10.0958	10.2972	0	0.563448	0.190139
chr3_437064	22-nt	-2.94619	4.08369e-05	12.4571	15.716	14.9797	12.9683	10.1906	19.5021	26.249	21.5305	2.69714	2.25379	1.52111
chr3_437067	22-nt	-2.95239	0.00045665	34.6533	36.3949	32.9062	6.48416	18.7507	23.1588	39.5754	60.8471	3.08245	3.38069	5.3239
chr3_437068	22-nt	-2.28633	0.00227269	25.1406	19.8518	26.2759	7.29468	25.2727	18.7708	23.826	37.4443	5.00898	3.94414	4.94362
chr3_437069	22-nt	-2.96954	0.00350917	7.47424	7.16869	6.87593	2.0263	9.37535	10.2386	12.1149	14.5097	1.54123	0.563448	1.14083
chr3_437071	22-nt	-2.97973	7.96949e-07	73.8365	106.427	104.858	47.4154	99.8679	59.2376	114.284	161.947	15.027	10.7055	10.2675
chr3_437072	22-nt	-3.20546	7.29151e-08	54.3581	91.2629	81.2833	32.8261	75.8181	70.2076	93.2848	103.908	10.018	5.35276	8.7464
chr3_437074	22-nt	-5.10547	1.19915e-05	18.7989	14.0617	12.0329	7.69994	49.3225	39.248	15.7494	19.1902	0	0	1.52111
chr3_437075	22-nt	-3.31523	0.000290063	17.6664	10.4773	12.7696	5.26838	25.2727	44.3673	13.3264	17.318	1.92653	1.69034	1.71125
chr3_437089	22-nt	-2.55202	0.00712433	48.9223	60.9338	44.448	6.0789	83.1553	75.0831	74.7086	89.3984	16.9535	6.76137	6.46473
chr3_437090	22-nt	-3.72464	1.06333e-05	37.1447	38.8763	39.291	49.847	62.7741	52.8995	31.0949	46.3374	0	6.76137	2.85209
chr3_437091	22-nt	-3.31646	1.7054e-07	40.9951	58.4524	68.7593	31.205	50.1378	43.3922	63.4013	109.993	7.32082	4.22586	5.70417
chr3_437092	22-nt	-3.05667	2.12024e-09	82.6697	127.106	113.944	96.4519	189.545	184.295	135.283	153.522	17.3388	16.0583	14.8309
chr3_437093	22-nt	-3.10249	1.95819e-06	24.9141	25.6418	27.0126	11.3473	22.8269	16.333	27.8643	23.4027	3.08245	1.97207	2.66195
chr3_437094	22-nt	-2.56351	0.00440453	17.8929	28.9505	21.1189	4.86312	8.15248	27.5467	29.8834	32.2958	3.85306	3.09896	3.61264
chr3_437097	22-nt	-2.74274	0.00157816	25.1406	45.2179	39.7822	6.88942	13.044	23.6463	45.6328	38.3805	5.00898	2.81724	5.13376
chr3_437098	22-nt	-2.94896	4.76047e-05	13.1365	18.7489	13.9974	16.6157	20.3812	38.2729	20.9992	30.4235	3.85306	1.97207	2.47181
chr3_471101	22-nt	10.0052	3.86988e-07	0	0	0	0	0	0	0	0	23.889	29.0176	22.0561
chr3_471102	22-nt	11.6665	3.0281e-10	0	0	0	0	0	0	0	0	73.5935	98.8851	77.3866
chr4_9932	22-nt	8.89147	3.38068e-05	0	0	0	0	0	0	0	0	10.4033	11.8324	12.359
chr4_48285	22-nt	10.6341	0.00087508	0	0	0	0	0	0	0	0	52.0164	0	507.862
chr4_49900	22-nt	3.45873	0.00268082	8.8332	14.6131	12.524	1.62104	0	5.1193	12.9226	7.48887	144.875	75.7837	56.4713
chr4_60853	22-nt	12.0056	3.0284e-30	0	0	0.245569	0.40526	1.6305	0.243776	0	0	1369.38	1969.81	1284.77
chr4_92132	22-nt	-5.05129	0.00294653	38.0507	36.1192	22.3468	0	0.407624	19.7459	45.6328	10.7653	0.385306	0	1.14083
chr4_92133	22-nt	-3.78812	0.00547698	19.4783	15.9917	16.6987	0	6.92961	14.3828	17.3647	19.6583	0.385306	1.97207	0.380278
chr4_198471	22-nt	10.7459	4.66844e-12	0	0	0	0	0.407624	0	0	0	111.739	204.813	45.063
chr4_198472	22-nt	8.69366	7.3916e-05	0	0	0	0	0	0	0	0	7.32082	15.4948	7.79571
chr4_219937	22-nt	-3.54393	1.80797e-05	10.8716	10.2016	8.10378	10.1315	11.8211	12.4326	13.3264	17.318	1.54123	0.281724	1.14083
chr4_219939	22-nt	-4.8802	0.00232368	9.96566	18.4732	4.42024	0.40526	44.431	6.33818	1.61532	14.0416	0	0.845172	0.190139
chr4_311270	22-nt	-8.69174	0.00103929	15.4015	28.9505	34.3797	2.83682	0	0	26.6528	63.1873	0	0	0
chr4_329715	22-nt	11.5386	6.63346e-10	0	0	0	0	0	0	0	0	50.8604	100.294	78.1472
chr4_329716	22-nt	10.4727	8.55831e-06	0	0	0	0	0	0	0	0	0	94.941	52.0981
chr4_334383	22-nt	12.7228	3.28314e-12	0	0	0	0	0	0	0	0	222.707	181.148	144.886
chr4_340645	22-nt	12.6653	2.42839e-11	0	0	0	0	0	0	0	0	375.288	128.184	60.8445
chr4_386789	22-nt	7.04974	4.82403e-05	0	0	0	0	0.815248	0	0	0	20.4212	8.45172	20.1548
chr4_447253	22-nt	7.76803	0.00772604	0	0	0	0	0	0	0	0	17.3388	0	4.3732
chr4_479064	22-nt	8.84271	4.10751e-05	0	0	0	0	0	0	0	0	8.86205	12.1141	12.5492
chr4_492226	22-nt	-7.79418	0.00698966	1.35895	0	1.47341	27.5577	33.4252	15.6017	0	3.74443	0	0	0
chr4_492227	22-nt	-6.23247	0.000777713	4.98283	0.551438	2.70126	138.599	138.592	56.7999	0	5.1486	0.770613	0.281724	0.190139
chr5_35079	22-nt	9.93413	0.00166131	0	0	0	0	0	0	0	0	0	76.9106	137.661
chr5_181265	22-nt	9.79218	0.00232368	0	0	0	0	0	0	0	0	135.628	0	66.1684
chr5_191260	22-nt	11.4116	3.49262e-20	0	0.275719	0	0	0.407624	0	0	0	228.101	418.36	277.983
chr5_203920	22-nt	9.97854	4.22041e-07	0	0	0	0	0	0	0	0	19.6506	26.7638	27.1899
chr5_203921	22-nt	9.5416	5.12871e-12	0	0	0	0	0.815248	0	0	0	66.2727	113.253	84.0415
chr5_271376	22-nt	11.881	1.84977e-10	0	0	0	0	0	0	0	0	150.655	63.1062	84.2316
chr5_306852	22-nt	10.4826	1.43246e-06	0	0	0	0	0	0	0	0	0.770613	90.1517	36.887
chr5_306853	22-nt	11.9533	6.27572e-09	0	0	0	0	0	0	0	0	3.46776	289.894	86.5133
chr5_306854	22-nt	11.5704	1.86059e-09	0	0	0	0	0	0	0	0	142.949	81.4182	23.0068
chr5_435856	22-nt	6.89314	8.46523e-09	0.226492	0.551438	0	0	0	0	0.40383	0.468054	23.1184	37.751	23.0068
chr6_61315	22-nt	9.24858	8.8687e-06	0	0	0	0	0	0	0	0	15.027	16.6217	12.5492
chr6_134942	22-nt	9.33439	8.55831e-06	0	0	0	0	0	0	0	0	24.6596	15.2131	7.98584
chr6_134944	22-nt	11.4613	3.35363e-09	0	0	0	0	0	0	0	0	52.0164	155.512	23.0068
chr6_171981	22-nt	8.91757	5.06057e-05	0	0	0	0	0	0	0	0	3.85306	9.86034	23.0068
chr6_171982	22-nt	8.61489	4.96093e-05	0	0	0	0	0.407624	0	0	0	0	54.091	50.9573
chr6_222854	22-nt	-9.62444	5.86049e-05	37.8242	37.4978	39.0455	0	33.8328	32.4223	43.2098	56.6346	0	0	0
chr6_337495	22-nt	-8.03127	0.00319516	7.02126	1.37859	3.43797	8.1052	15.0821	36.8102	0.40383	6.08471	0	0	0
chr6_337496	22-nt	-4.8922	6.91331e-05	15.628	9.65016	19.4	4.86312	13.4516	53.6308	15.3455	19.1902	0	0	1.52111
chr6_337501	22-nt	-2.33467	0.00124767	26.2731	23.9875	22.8379	40.526	26.0879	47.0488	25.0375	32.7638	10.4033	5.35276	2.47181
chr7_89112	22-nt	8.96615	2.52489e-05	0	0	0	0	0	0	0	0	11.1739	13.241	11.9788
chr7_100014	22-nt	10.3573	0.00112951	0	0	0	0	0	0	0	0	0	233.267	137.09
chr7_148837	22-nt	-5.44176	0.00281216	5.8888	5.23866	3.68354	1.21578	4.89149	27.7905	6.86511	6.55276	0	0	0.190139
chr7_186043	22-nt	8.04671	0.00450407	0	0	0	0	0	0	0	0	3.08245	0	23.3871
chr7_254224	22-nt	11.3179	1.52787e-25	0	0	0	0.40526	1.22287	0.487553	0	0	651.553	1018.15	759.416
chr7_254225	22-nt	14.2736	1.52787e-25	0	0	0	0	0.407624	0	0	0	1145.52	1817.12	1514.46
chr7_254226	22-nt	12.7171	5.14497e-19	0	0	0	0	0	0.243776	0	0	354.482	602.044	426.292
chr7_347245	22-nt	-7.60292	0.00982286	0.226492	4.68722	1.47341	14.1841	42.3929	10.2386	0	0	0	0	0
chr7_351074	22-nt	-3.51303	0.00777577	10.1921	12.9588	24.8025	32.8261	43.6158	28.7656	21.403	20.5944	0	0	5.70417
chr8_59226	22-nt	7.0344	0.00117866	0.226492	0	0	0	0	0	0	0	2.69714	18.0303	3.99292
chr8_147121	22-nt	-3.30366	0.00122531	4.75634	7.72013	6.63036	7.29468	5.29911	6.58196	9.2881	16.85	1.54123	0.563448	0.380278
chr8_165617	22-nt	-3.25414	0.00777577	8.6067	5.79009	2.70126	13.3736	41.5777	11.945	10.9034	4.21249	1.15592	1.97207	0.570417
chr8_166159	22-nt	10.0698	8.55831e-06	0	0	0	0	0	0	0	0	5.39429	1.1269	90.6964
chr8_172994	22-nt	9.02377	2.02741e-05	0	0	0	0	0	0	0	0	13.871	12.3959	11.5985
chr8_182591	22-nt	9.26997	1.19915e-05	0	0	0	0	0	0	0	0	6.93552	27.0455	12.1689
chr8_182592	22-nt	11.7503	2.55382e-10	0	0	0	0	0	0	0	0	59.7225	109.309	98.6822
chr8_329806	22-nt	8.46766	0.00141553	0	0	0	0	0	0	0	0	0	23.6648	10.2675
chr8_358110	22-nt	-3.19026	0.00777577	28.991	19.0246	24.0658	31.205	39.1319	58.9939	0.80766	91.2706	6.1649	2.25379	3.04223
chr8_358119	22-nt	-2.34803	0.0038518	42.5805	46.5965	33.3974	19.8577	13.044	50.4617	66.2282	57.5707	10.018	9.57861	4.3732
chr8_358120	22-nt	-4.22755	5.53711e-06	21.5168	19.3003	15.2253	19.8577	9.78298	36.0789	27.4605	25.743	0	0.563448	2.47181
chr8_358123	22-nt	-3.91487	0.00248967	7.92723	5.23866	6.38479	1.21578	5.70674	7.55707	8.88427	7.95692	0.385306	0.845172	0
chr9_6115	22-nt	-4.50024	0.0033328	3.17089	4.4115	5.64809	2.83682	4.89149	6.58196	6.86511	1.40416	0	0.281724	0.190139
chr9_6360	22-nt	-3.56787	0.00440453	4.75634	5.51438	5.15695	1.62104	6.11436	5.85063	4.84596	3.27638	0.385306	0.563448	0.190139
chr9_32389	22-nt	8.47594	0.000161944	0	0	0	0	0	0	0	0	6.55021	13.241	6.65487
chr9_89503	22-nt	10.1649	4.19327e-07	0	0	0	0	0	0	0	0	42.3837	36.0607	9.12668
chr9_115021	22-nt	10.007	1.80797e-05	0	0	0	0	0	0	0	0	5.00898	0.281724	93.1682
chr9_116747	22-nt	6.61697	0.00780931	0	0	0	0	0.407624	0	0	0	1.54123	22.5379	0.190139
chr9_210276	22-nt	10.9147	1.75625e-13	0	0	0	0	0.407624	0	0	0	122.527	153.821	112.372
chr9_210279	22-nt	11.3594	1.16105e-09	0	0	0	0	0	0	0	0	68.1992	72.9665	57.9924
chr9_210280	22-nt	8.77163	5.12017e-05	0	0	0	0	0	0	0	0	8.09143	10.4238	13.4999
chr9_212808	22-nt	8.83771	4.10751e-05	0	0	0	0	0	0	0	0	10.018	10.9872	12.359
chr9_232473	22-nt	9.62768	1.86059e-09	0	0	0.245569	0	0	0	0	0	73.5935	47.3296	28.711
chr9_234272	22-nt	-7.85511	0.00780931	67.0417	11.8559	33.1518	0	0	0	0	25.743	0	0	0
chr9_323986	22-nt	11.1149	3.35363e-09	0	0	0	0	0	0	0	0	47.3927	71.2762	48.4855
chr1_6217	24-nt	9.84762	3.12743e-17	0	0	0	0	0	0	0	0	68.9698	146.778	102.865
chr1_6218	24-nt	9.11063	1.10645e-16	0	0	0.245569	0	0	0	0	0	44.3102	125.649	105.527
chr1_121509	24-nt	6.74224	1.32105e-06	0	0	0	0	0.407624	0	0	0	4.62368	31.8348	17.4928
chr1_227484	24-nt	5.47258	0.000501151	0	0	0	0	0.407624	0	0.40383	0	11.5592	12.6776	5.3239
chr1_227485	24-nt	7.54719	1.65526e-07	0	0	0	0	0	0	0	0	10.018	31.5531	14.8309
chr1_234867	24-nt	6.43694	0.000185224	0	0	0	0	0	0	0	0	7.32082	10.9872	6.84501
chr1_293812	24-nt	6.46154	6.38076e-07	0	0	0	0	0.407624	0.243776	0	0	9.24735	15.4948	30.4223
chr1_293814	24-nt	6.42307	1.61102e-05	0	0	0	0	0.407624	0	0	0	7.32082	32.68	4.56334
chr1_321580	24-nt	9.12067	9.01824e-14	0	0	0	0	0	0	0	0	58.9519	90.4334	33.6546
chr1_330970	24-nt	5.58906	0.000532389	0	0	0	0	0.407624	0.243776	0	0	2.69714	22.8196	6.84501
chr1_358273	24-nt	6.66442	4.03123e-07	0	0	0	0	0	0.243776	0	0.468054	4.23837	42.2586	23.197
chr1_358274	24-nt	9.17074	4.37757e-18	0.679477	0	0	0	0	0	0	0	61.2637	293.556	178.731
chr1_431084	24-nt	-2.60187	0.00386614	20.6108	17.9217	12.524	17.4262	9.78298	22.1836	20.1915	24.3388	2.69714	2.25379	3.23237
chr1_431085	24-nt	-3.10162	0.000528895	20.6108	22.3332	14.4886	12.5631	7.33723	18.7708	16.1532	19.6583	1.15592	1.97207	1.90139
chr1_431087	24-nt	-2.9467	0.00694653	11.5511	12.6831	6.13923	12.9683	8.15248	11.945	11.3072	14.5097	0.770613	2.25379	0.760557
chr1_448302	24-nt	7.38004	7.84334e-07	0	0	0	0	0	0	0	0	3.85306	36.0607	14.4506
chr1_496508	24-nt	6.34246	0.000438354	0	0	0	0	0	0	0	0	1.15592	16.0583	9.31682
chr1_509259	24-nt	7.35535	9.23083e-07	0	0	0	0	0	0	0	0	3.08245	33.2434	17.4928
chr1_531194	24-nt	6.47525	0.000212325	0	0	0	0	0	0	0	0	1.54123	18.3121	8.93654
chr1_542920	24-nt	6.9511	8.81556e-06	0	0	0	0	0	0	0	0	5.39429	18.3121	13.1196
chr1_542921	24-nt	5.89607	0.00281234	0	0	0	0	0	0	0	0	5.00898	5.35276	7.22529
chr1_591651	24-nt	-5.14659	0.00903661	0.452984	5.79009	0	44.1733	92.123	105.799	9.69193	0.468054	0.385306	0	0
chr10_49271	24-nt	6.79452	9.38169e-05	0	0	0	0	0	0	0	0	0	27.8907	21.1054
chr10_151539	24-nt	6.81647	4.76795e-07	0	0	0.245569	0	0	0	0	0	14.6416	16.9034	17.4928
chr10_169840	24-nt	5.64992	0.00853781	0	0	0	0	0	0	0	0	6.93552	7.0431	1.71125
chr10_240292	24-nt	8.14621	1.0779e-09	0	0	0	0	0	0	0	0	16.1829	31.5531	38.0278
chr2_6618	24-nt	6.56811	0.000105402	0	0	0	0	0	0	0	0	3.46776	18.0303	7.60557
chr2_77582	24-nt	8.06272	2.85105e-09	0	0	0	0	0	0	0	0	10.7886	45.3576	27.9505
chr2_161793	24-nt	6.77668	2.66018e-05	0	0	0	0	0	0	0	0	12.7151	15.4948	4.56334
chr2_213855	24-nt	7.10395	3.39077e-06	0	0	0	0	0	0	0	0	10.4033	24.7917	6.46473
chr2_404707	24-nt	7.32129	6.31432e-07	0	0	0	0	0	0	0	0	11.1739	18.8755	16.1618
chr2_474285	24-nt	6.25897	0.000460936	0	0	0	0	0	0	0	0	6.93552	8.45172	6.84501
chr3_116785	24-nt	4.90689	0.00442222	0.226492	0	0.245569	0	0	0	0.40383	0	4.23837	10.4238	7.79571
chr3_313527	24-nt	4.93161	0.00123003	0	0.275719	0	0	0.407624	0	1.61532	0	13.4857	18.0303	14.0703
chr3_471101	24-nt	7.52511	1.77354e-07	0	0	0	0	0	0	0	0	8.86205	25.3552	20.7252
chr3_471102	24-nt	8.26554	3.71403e-10	0	0	0	0	0	0	0	0	18.88	44.2307	30.6124
chr4_60853	24-nt	9.21952	1.16473e-23	0	0	0.245569	0.40526	0.815248	0	0	0	155.278	268.201	205.54
chr4_198471	24-nt	6.80156	8.30487e-07	0	0	0	0	0	0.243776	0	0	14.6416	28.7358	7.60557
chr4_217461	24-nt	7.35436	5.53119e-07	0	0	0	0	0	0	0	0	18.1094	20.8476	9.12668
chr4_329715	24-nt	6.46749	8.81556e-06	0	0.275719	0	0	0	0	0	0	5.39429	18.8755	16.5421
chr4_334383	24-nt	7.09893	1.09582e-09	0	0.275719	0	0	0	0.243776	0	0	21.9625	30.9896	26.9998
chr4_340645	24-nt	8.70075	5.615e-15	0	0.275719	0	0	0	0	0	0	87.4646	73.53	39.1687
chr5_35079	24-nt	6.46602	0.000453267	0	0	0	0	0	0	0	0	0	15.4948	22.4364
chr5_181265	24-nt	5.97056	0.00389185	0	0	0	0	0	0	0	0	10.018	0	16.9224
chr5_188653	24-nt	7.26491	9.36574e-07	0	0	0	0	0	0	0	0	11.5592	23.9465	9.88724
chr5_191260	24-nt	8.76595	1.58378e-15	0	0	0	0	0	0	0	0.468054	44.6955	102.266	70.9219
chr5_203920	24-nt	9.07036	9.68566e-14	0	0	0	0	0	0	0	0	39.3013	70.431	61.2248
chr5_203921	24-nt	9.99167	1.18488e-17	0	0	0	0	0	0	0	0	59.3372	180.303	129.675
chr5_271376	24-nt	7.5619	1.27416e-07	0	0	0	0	0	0	0	0	18.4947	12.6776	23.9575
chr5_286241	24-nt	6.40032	0.000306685	0	0	0	0	0	0	0	0	10.4033	15.2131	1.52111
chr5_306853	24-nt	8.87883	1.19628e-10	0	0	0	0	0	0	0	0	0.770613	181.43	61.2248
chr5_306854	24-nt	4.82994	0.00829419	0.679477	0.275719	0	0	0	0	0	0	8.47674	12.1141	5.51404
chr6_134942	24-nt	6.33008	0.000333873	0	0	0	0	0	0	0	0	7.32082	10.7055	5.51404
chr6_171982	24-nt	6.12918	0.00201167	0	0	0	0	0	0	0	0	0	15.4948	13.8802
chr6_261998	24-nt	5.84952	0.00645635	0	0	0	0	0	0	0	0	18.88	0	6.27459
chr7_96582	24-nt	5.72166	0.00635871	0	0	0	0	0	0	0	0	5.7796	7.88827	2.47181
chr7_125563	24-nt	-5.27598	0.0081642	14.269	1.10288	0.982276	21.0735	14.6745	17.5519	0	1.40416	0	0	0
chr7_254224	24-nt	9.31386	9.18404e-22	0	0	0	0.81052	0.407624	0	0	0	112.124	294.12	200.026
chr7_254225	24-nt	9.67403	1.2049e-23	0.226492	0	0	0	0.407624	0.243776	0	0	85.538	363.706	280.836
chr7_254226	24-nt	9.84316	1.88609e-16	0	0	0	0	0	0	0	0	30.8245	197.207	129.485
chr7_351074	24-nt	-3.73326	0.00286102	10.1921	20.1275	25.7847	36.4734	33.0175	22.1836	21.8068	21.5305	0	0	3.80278
chr8_44645	24-nt	-5.47431	0.00210809	2.03843	3.03291	6.38479	8.1052	5.29911	3.41287	5.65362	13.1055	0	0	0
chr8_182591	24-nt	5.75044	0.00123003	0	0.275719	0	0	0	0	0	0	1.15592	17.1852	8.93654
chr8_182592	24-nt	7.55486	1.63007e-07	0	0	0	0	0	0	0	0	8.09143	25.3552	23.197
chr8_329806	24-nt	6.38011	0.000666361	0	0	0	0	0	0	0	0	0	27.8907	8.55626
chr9_210276	24-nt	8.61309	1.33532e-14	0.226492	0	0	0	0	0	0	0	42.3837	82.5451	56.8516
chr9_210279	24-nt	8.12062	1.19389e-09	0	0	0	0	0	0	0	0	16.9535	39.7231	27.38
chr9_210280	24-nt	5.9544	0.00223238	0	0	0	0	0	0	0	0	3.08245	9.29689	6.27459
chr9_232473	24-nt	6.11439	5.29582e-05	0	0	0	0	0	0	0	0.468054	10.4033	14.0862	8.36612
chr9_323986	24-nt	6.41207	1.32686e-05	0	0	0	0	0	0.243776	0	0	5.7796	20.0024	12.7393

## Sheet: S10
Table S10: Differentially sRNAs generation loci identified in B73 genome between the sickly plants and normal plants using DESeq2 (FDR < 0.05 & fold change > 1.5).
loci	sRNA_size_procuded	log2FoldChange	FDR	Bravo_BC1_SFG-1-4-1	Bravo_BC2_FS4070-211	Maize_SFG-B73-2-2	Bravo_teosinte_PI384063-1-1	Bravo_teosinte_PI384063-3-1	Teloloapan_teosinte_PI384065-1-1	Teloloapan_BC1_SFG-35-2-1	Teloloapan_BC4_SFG-25-3-2
chr1_6071	21-nt	10.7058	3.52332e-06	0	0	0	0	0	0	57.4913	93.8607
chr1_6072	21-nt	10.203	1.34873e-05	0	0	0	0	0	0	36.3666	67.1618
chr1_6073	21-nt	9.30373	0.000170997	0	0	0	0	0	0	21.6595	31.1763
chr1_187839	21-nt	8.77315	0.000740613	0	0	0	0	0	0	8.82424	28.1914
chr1_228199	21-nt	8.13243	0.00709421	0	0	0	0	0	0	28.8793	0.165832
chr1_291468	21-nt	8.32847	0.00218795	0	0	0	0	0	0	18.9855	7.95992
chr1_291470	21-nt	8.69659	0.00404604	0	0	0	0	0	0	54.015	0
chr1_327133	21-nt	11.8005	4.64872e-07	0	0	0	0	0	0	54.8172	329.176
chr1_327134	21-nt	9.17951	0.000216515	0	0	0	0	0	0	30.2163	18.2415
chr1_327135	21-nt	8.34618	0.00197125	0	0	0	0	0	0	12.3005	14.5932
chr1_527183	21-nt	11.0288	1.63439e-06	0	0	0	0	0	0	79.1508	114.424
chr1_559002	21-nt	9.28708	0.000174693	0	0	0	0	0	0	18.1833	34.3271
chr10_136087	21-nt	10.8151	3.01462e-06	0	0	0	0	0	0	45.993	121.886
chr10_136088	21-nt	10.672	4.02097e-06	0	0	0	0	0	0	43.8538	105.801
chr10_241099	21-nt	11.1783	1.33008e-06	0	0	0	0	0	0	68.9895	151.57
chr10_241100	21-nt	10.0477	2.50159e-05	0	0	0	0	0	0	18.9855	76.4484
chr10_250524	21-nt	7.81477	0.00817051	0	0	0	0	0	0	2.67401	17.0807
chr2_77497	21-nt	10.2483	1.27698e-05	0	0	0	0	0	0	38.2384	68.8201
chr2_77498	21-nt	10.8305	2.76969e-06	0	0	0	0	0	0	54.015	114.092
chr2_142004	21-nt	8.94756	0.000550715	0	0	0	0	0	0	37.1688	6.13577
chr2_142005	21-nt	10.4916	6.12906e-06	0	0	0	0	0	0	84.4988	44.6087
chr2_300663	21-nt	9.4302	0.000144507	0	0	0	0	0	0	14.7071	44.6087
chr2_300664	21-nt	8.89576	0.000550715	0	0	0	0	0	0	32.0881	8.62324
chr2_408694	21-nt	8.05035	0.00401505	0	0	0	0	0	0	11.7657	10.2816
chr2_410365	21-nt	10.244	0.000174693	0	0	0	0	0	0	0	190.043
chr2_410367	21-nt	10.0552	2.13693e-05	0	0	0	0	0	0	31.5533	61.1918
chr3_74675	21-nt	8.22494	0.00898276	0	0	0	0	0	0	0	36.6488
chr3_289499	21-nt	8.35659	0.0071146	0	0	0	0	0	0	0	40.4629
chr3_314089	21-nt	9.05367	0.000309374	0	0	0	0	0	0	15.5093	28.8547
chr3_316742	21-nt	10.1143	0.000216515	0	0	0	0	0	0	0	169.812
chr3_316743	21-nt	8.83412	0.0029591	0	0	0	0	0	0	0	58.5385
chr3_370829	21-nt	8.04741	0.00404604	0	0	0	0	0	0	13.6375	8.45741
chr3_370830	21-nt	10.5862	4.39757e-06	0	0	0	0	0	0	51.341	86.8957
chr3_381203	21-nt	9.37904	0.000150656	0	0	0	0	0	0	38.5058	17.9098
chr3_399656	21-nt	8.48664	0.00147711	0	0	0	0	0	0	9.35904	20.5631
chr3_399657	21-nt	10.6305	4.02097e-06	0	0	0	0	0	0	50.8062	92.534
chr3_399658	21-nt	10.98	2.0136e-06	0	0	0	0	0	0	60.7001	128.022
chr3_462064	21-nt	9.46805	0.000113499	0	0	0	0	0	0	21.6595	38.1413
chr3_462065	21-nt	11.3482	8.40573e-07	0	0	0	0	0	0	92.7882	156.379
chr3_462066	21-nt	10.8619	2.414e-06	0	0	0	0	0	0	66.0481	104.474
chr4_31499	21-nt	6.31099	0.000352332	0	1.10745	0.319902	0	0	0.299382	40.9124	22.7189
chr4_50158	21-nt	9.24891	0.000189006	0	0	0	0	0	0	18.1833	32.8347
chr4_62900	21-nt	11.9767	2.34059e-07	0	0	0	0	0	0	128.353	284.069
chr4_163806	21-nt	9.16615	0.000287173	0	0	0	0	0	0	41.7146	8.45741
chr4_207103	21-nt	10.009	2.23981e-05	0	0	0	0	0	0	34.4948	54.5586
chr4_216540	21-nt	9.2196	0.000216515	0	0	0	0	0	0	13.3701	37.3121
chr4_257994	21-nt	-8.1489	0.00251773	34.8171	31.3777	33.2698	133.035	0	0	0	0
chr4_323793	21-nt	10.0002	2.50159e-05	0	0	0	0	0	0	67.1177	23.3823
chr4_331308	21-nt	9.10037	0.000269131	0	0	0	0	0	0	27.8097	17.9098
chr4_331309	21-nt	9.66753	6.14994e-05	0	0	0	0	0	0	27.5423	41.4579
chr4_416985	21-nt	8.2233	0.00260548	0	0	0	0	0	0	12.3005	12.4374
chr4_416986	21-nt	9.90999	2.97606e-05	0	0	0	0	0	0	27.2749	56.0511
chr4_458525	21-nt	8.64347	0.000898505	0	0	0	0	0	0	14.4397	18.5731
chr4_466271	21-nt	9.66935	6.38639e-05	0	0	0	0	0	0	22.4617	47.262
chr4_475311	21-nt	8.41943	0.00680636	0	0	0	0	0	0	43.5864	0
chr4_475312	21-nt	10.6662	3.96131e-06	0	0	0	0	0	0	52.1432	95.1873
chr4_475313	21-nt	11.3525	8.40573e-07	0	0	0	0	0	0	92.2534	157.872
chr5_6374	21-nt	8.24281	0.00874991	0	0	0	0	0	0	0	37.1463
chr5_61436	21-nt	10.3931	7.62617e-06	0	0	0	0	0	0	63.9089	54.5586
chr5_61437	21-nt	8.84376	0.000864427	0	0	0	0	0	0	3.20881	38.4729
chr5_180660	21-nt	10.4463	8.47406e-06	0	0	0	0	0	0	28.6119	99.6648
chr5_190991	21-nt	11.9062	2.34059e-07	0	0	0	0	0	0	113.378	278.929
chr5_203700	21-nt	9.98217	2.42759e-05	0	0	0	0	0	0	32.0881	55.3877
chr5_203701	21-nt	8.05227	7.61468e-05	0.344724	0	0	0	0	0	20.5899	40.1312
chr5_325894	21-nt	9.34003	0.000172795	0	0	0	0	0	0	42.2494	13.4324
chr5_362536	21-nt	-8.00002	0.00323	33.7829	33.2234	32.9499	0	72.2637	0	0	0
chr5_388620	21-nt	9.36234	1.02749e-06	0	0.369149	0	0	0	0	52.9454	104.308
chr5_388621	21-nt	10.9243	2.21369e-06	0	0	0	0	0	0	60.9675	119.233
chr5_388622	21-nt	8.07363	0.00469438	0	0	0	0	0	0	2.67401	21.0606
chr5_396070	21-nt	11.2117	1.56424e-06	0	0	0	0	0	0	41.982	194.686
chr5_412799	21-nt	8.90683	0.00258358	0	0	0	0	0	0	0	62.021
chr5_425007	21-nt	8.9909	0.000366498	0	0	0	0	0	0	14.4397	28.0255
chr6_25498	21-nt	-7.80733	0.00488289	0	41.7139	21.7533	73.8073	0	14.6697	0	0
chr6_27100	21-nt	9.37242	0.000150961	0	0	0	0	0	0	17.6485	38.4729
chr6_48391	21-nt	7.7295	0.00828357	0	0	0	0	0	0	7.75463	10.1157
chr6_180022	21-nt	8.79101	0.000619556	0	0	0	0	0	0	21.9269	14.759
chr6_267133	21-nt	8.60934	0.00449293	0	0	0	0	0	0	0	49.0861
chr7_28169	21-nt	8.42045	0.00169614	0	0	0	0	0	0	17.6485	10.7791
chr7_47843	21-nt	10.2284	1.30294e-05	0	0	0	0	0	0	38.5058	66.8301
chr7_100386	21-nt	9.39056	0.0010702	0	0	0	0	0	0	94.66	0
chr7_252661	21-nt	9.71012	0.000172795	0	0	0	0	0	0	86.3706	1.49248
chr7_262120	21-nt	8.43032	0.00192257	0	0	0	0	0	0	5.34802	24.2114
chr8_165352	21-nt	8.71755	0.00373472	0	0	0	0	0	0	0	53.3978
chr8_287501	21-nt	9.23386	0.000200374	0	0	0	0	0	0	34.4948	16.2515
chr8_287504	21-nt	10.0685	2.23981e-05	0	0	0	0	0	0	23.7987	71.6392
chr9_7054	21-nt	-7.71045	0.00465856	3.10251	13.2894	42.227	2.278	0.286761	23.0524	0	0
chr9_113978	21-nt	8.5772	0.00493164	0	0	0	0	0	0	49.2018	0
chr9_116416	21-nt	8.9752	0.00227788	0	0	0	0	0	0	0	65.5035
chr9_206839	21-nt	8.67728	0.000864427	0	0	0	0	0	0	11.4983	22.5531
chr9_206840	21-nt	8.37992	0.00187732	0	0	0	0	0	0	10.696	16.9148
chr9_229671	21-nt	10.1321	1.65194e-05	0	0	0	0	0	0	35.0296	63.016
chr9_229672	21-nt	10.1945	1.34873e-05	0	0	0	0	0	0	38.2384	64.3426
chr1_6071	22-nt	11.5195	5.83907e-05	0	0	0	0	0	0	113.646	163.676
chr1_6072	22-nt	10.9152	0.00016811	0	0	0	0	0	0	68.9895	103.645
chr1_6073	22-nt	9.30004	0.00274335	0	0	0	0	0	0	23.7987	26.3672
chr1_110702	22-nt	10.1726	0.00234882	0	0	0	0	0	0	0	132.168
chr1_187839	22-nt	10.0104	0.000969624	0	0	0	0	0	0	14.1723	73.6292
chr1_228199	22-nt	9.35377	0.00777991	0	0	0	0	0	0	68.9895	0
chr1_291468	22-nt	9.45171	0.002261	0	0	0	0	0	0	37.7036	18.739
chr1_291470	22-nt	10.2446	0.002261	0	0	0	0	0	0	142.525	0
chr1_291471	22-nt	9.34402	0.00782694	0	0	0	0	0	0	68.4547	0
chr1_327133	22-nt	9.74504	0.00134206	0	0	0	0	0	0	31.2859	38.8046
chr1_327134	22-nt	9.55264	0.00182233	0	0	0	0	0	0	35.297	25.3722
chr1_327135	22-nt	9.78614	0.00130736	0	0	0	0	0	0	33.1577	39.1362
chr1_527183	22-nt	12.4899	1.11081e-05	0	0	0	0	0	0	239.859	359.523
chr1_559001	22-nt	10.3989	0.00041658	0	0	0	0	0	0	83.1618	33.3321
chr1_559002	22-nt	11.6403	4.68994e-05	0	0	0	0	0	0	127.283	177.771
chr1_559003	22-nt	9.20274	0.00446493	0	0	0	0	0	0	1.87181	47.9253
chr1_606808	22-nt	8.79788	0.00729101	0	0	0	0	0	0	8.02204	27.0305
chr10_136087	22-nt	12.1935	2.01183e-05	0	0	0	0	0	0	112.576	367.814
chr10_136088	22-nt	11.6651	4.68994e-05	0	0	0	0	0	0	91.986	221.551
chr10_241099	22-nt	12.1897	2.0089e-05	0	0	0	0	0	0	164.184	309.11
chr10_241100	22-nt	11.5276	6.12356e-05	0	0	0	0	0	0	52.9454	232.496
chr10_250524	22-nt	9.46452	0.00244364	0	0	0	0	0	0	6.68503	51.9053
chr2_77497	22-nt	11.4817	6.09595e-05	0	0	0	0	0	0	125.679	143.113
chr2_77498	22-nt	11.7004	4.40276e-05	0	0	0	0	0	0	140.118	179.596
chr2_142004	22-nt	9.59428	0.00182233	0	0	0	0	0	0	50.2714	13.2665
chr2_142005	22-nt	12.1819	2.0089e-05	0	0	0	0	0	0	304.035	166.163
chr2_300663	22-nt	10.3199	0.000464706	0	0	0	0	0	0	37.1688	71.9709
chr2_300664	22-nt	11.5574	6.12356e-05	0	0	0	0	0	0	254.566	40.9604
chr2_379167	22-nt	9.56116	0.00555424	0	0	0	0	0	0	0	80.2625
chr2_408694	22-nt	9.62787	0.00160963	0	0	0	0	0	0	37.1688	27.0305
chr2_410367	22-nt	9.76606	0.000100605	0	0	0.319902	0	0	0	81.29	145.6
chr3_4078	22-nt	-8.8579	0.00747566	262.68	0	0	0	397.45	560.144	0	0
chr3_33595	22-nt	9.33111	0.00262549	0	0	0	0	0	0	25.1357	26.2014
chr3_74675	22-nt	9.58657	0.00537912	0	0	0	0	0	0	0	81.9208
chr3_289499	22-nt	9.01163	0.00308392	0	0	0	0.455601	0	0	0	202.149
chr3_314089	22-nt	10.776	0.000217827	0	0	0	0	0	0	70.5939	84.0766
chr3_316742	22-nt	11.3823	0.000393341	0	0	0	0	0	0	0	366.488
chr3_316743	22-nt	10.4338	0.00160963	0	0	0	0	0	0	0	164.173
chr3_340780	22-nt	9.1441	0.00369678	0	0	0	0	0	0	31.5533	13.4324
chr3_344406	22-nt	8.01621	0.00349227	0.344724	0	0	0	0	0	30.7511	32.0055
chr3_370829	22-nt	10.0489	0.000812496	0	0	0	0	0	0	60.4327	28.3572
chr3_370830	22-nt	11.741	4.20234e-05	0	0	0	0	0	0	137.177	193.194
chr3_381203	22-nt	10.4495	0.00038897	0	0	0	0	0	0	82.8944	37.9754
chr3_399656	22-nt	10.359	0.000429494	0	0	0	0	0	0	41.1798	71.1417
chr3_399657	22-nt	11.26	8.86371e-07	0	0.369149	0	0	0	0.299382	463.674	709.262
chr3_399658	22-nt	11.573	1.82884e-06	0	0.369149	0	0	0	0	336.658	603.793
chr3_399659	22-nt	9.45515	0.00262549	0	0	0	0	0	0	4.27842	54.7244
chr3_462064	22-nt	8.97961	0.00495952	0	0	0	0	0	0	17.3811	22.2214
chr3_462065	22-nt	11.7614	4.20234e-05	0	0	0	0	0	0	153.488	181.917
chr3_462066	22-nt	11.0555	0.000132163	0	0	0	0	0	0	80.7552	111.77
chr4_50158	22-nt	10.3201	0.000464731	0	0	0	0	0	0	33.1577	76.2825
chr4_55903	22-nt	9.31426	0.00814217	0	0	0	0	0	0	66.8503	0
chr4_62900	22-nt	14.6645	6.04956e-08	0	0	0	0	0	0	1524.99	1896.12
chr4_163806	22-nt	10.5892	0.000382389	0	0	0	0	0	0	121.935	16.749
chr4_207103	22-nt	12.2854	1.76763e-05	0	0	0	0	0	0	203.225	305.959
chr4_216540	22-nt	10.4773	0.000382389	0	0	0	0	0	0	43.8538	79.2675
chr4_323793	22-nt	11.5841	5.5782e-05	0	0	0	0	0	0	213.386	81.2575
chr4_331308	22-nt	10.6285	0.000294996	0	0	0	0	0	0	93.5904	45.1062
chr4_331309	22-nt	11.4362	6.20592e-05	0	0	0	0	0	0	100.543	159.364
chr4_416985	22-nt	8.48816	0.00151023	0	0	0	0	0.286761	0	36.3666	47.262
chr4_416986	22-nt	11.0634	0.000132163	0	0	0	0	0	0	65.7807	128.685
chr4_458525	22-nt	9.43293	0.00228583	0	0	0	0	0	0	20.8573	34.6588
chr4_466271	22-nt	10.7439	0.000231491	0	0	0	0	0	0	50.2714	101.323
chr4_475311	22-nt	9.88129	0.00360595	0	0	0	0	0	0	105.623	0
chr4_475312	22-nt	12.6115	9.45432e-06	0	0	0	0	0	0	229.698	432.82
chr4_475313	22-nt	10.9662	0.000155377	0	0	0	0	0	0	77.8137	101.655
chr5_6371	22-nt	9.43669	0.00670869	0	0	0	0	0	0	0	72.6342
chr5_6372	22-nt	9.19634	0.00922627	0	0	0	0	0	0	0	60.031
chr5_6374	22-nt	10.1277	0.00244364	0	0	0	0	0	0	0	127.359
chr5_53969	22-nt	9.34464	0.0075867	0	0	0	0	0	0	0	67.4934
chr5_61435	22-nt	9.41859	0.00274873	0	0	0	0	0	0	4.27842	53.0661
chr5_61436	22-nt	11.8407	4.1168e-05	0	0	0	0	0	0	207.236	150.243
chr5_61437	22-nt	11.2751	0.000113149	0	0	0	0	0	0	26.2053	212.099
chr5_180660	22-nt	11.8056	4.20234e-05	0	0	0	0	0	0	85.8358	266.657
chr5_190991	22-nt	13.1427	2.59774e-06	0	0	0	0	0	0	327.834	687.372
chr5_203700	22-nt	10.7642	0.000219272	0	0	0	0	0	0	64.9785	88.3882
chr5_203701	22-nt	10.408	0.000393341	0	0	0	0	0	0	50.5388	65.8351
chr5_325894	22-nt	8.55551	0.00134206	0	0	0.319902	0	0	0	61.7697	29.8497
chr5_388620	22-nt	11.8346	1.15262e-06	0.344724	0	0	0	0	0	441.212	679.08
chr5_388621	22-nt	11.7928	1.23475e-06	0	0	0	0	0.286761	0	364.2	658.185
chr5_388622	22-nt	9.84923	0.00134206	0	0	0	0	0	0	9.62644	68.6543
chr5_396070	22-nt	12.6566	9.45432e-06	0	0	0	0	0	0	135.038	565.651
chr5_412799	22-nt	11.0356	0.000684363	0	0	0	0	0	0	0	272.627
chr5_425007	22-nt	9.75896	0.00134206	0	0	0	0	0	0	23.5313	47.5937
chr6_27100	22-nt	10.4809	0.000386386	0	0	0	0	0	0	34.7622	89.3832
chr6_180022	22-nt	10.4378	0.00038897	0	0	0	0	0	0	70.5939	48.5886
chr6_267133	22-nt	10.1355	0.00244364	0	0	0	0	0	0	0	128.188
chr7_28169	22-nt	9.81263	0.00129642	0	0	0	0	0	0	50.2714	23.8797
chr7_47843	22-nt	12.6194	1.82031e-08	0.344724	0	0	0.455601	0	0	1201.43	2380.84
chr7_100384	22-nt	9.48422	0.00625814	0	0	0	0	0	0	0	75.4534
chr7_100386	22-nt	11.4639	0.000155377	0	0	0	0	0	0	314.731	1.16082
chr7_252661	22-nt	8.75087	0.00856175	0	0	0	0	0	0	31.8207	2.98497
chr7_262120	22-nt	9.74249	0.00149814	0	0	0	0	0	0	13.3701	57.8752
chr8_59575	22-nt	9.29829	0.00357169	0	0	0	0	0	0	2.94141	49.9153
chr8_165352	22-nt	10.4941	0.00151172	0	0	0	0	0	0	0	172.631
chr8_287501	22-nt	10.608	0.000299711	0	0	0	0	0	0	90.1142	46.267
chr8_287504	22-nt	10.8589	0.000187381	0	0	0	0	0	0	64.4437	100.826
chr9_206839	22-nt	9.63629	0.00160963	0	0	0	0	0	0	26.4727	38.1413
chr9_206840	22-nt	9.93636	0.000969624	0	0	0	0	0	0	38.2384	42.7845
chr9_229671	22-nt	11.8028	4.20234e-05	0	0	0	0	0	0	120.331	227.853
chr9_229672	22-nt	11.2192	0.000100605	0	0	0	0	0	0	86.1032	132.997
chr1_6071	24-nt	11.7091	3.69693e-07	0	0	0	0	0	0	146.536	379.423
chr1_6072	24-nt	11.0942	2.10997e-06	0	0	0	0	0	0	84.4988	235.978
chr1_327133	24-nt	8.7603	0.00693972	0	0	0	0	0	0	13.6375	36.6488
chr1_527183	24-nt	8.62199	0.000180011	0.344724	0	0	0	0	0	24.6009	90.3782
chr1_559002	24-nt	8.64092	0.0095826	0	0	0	0	0	0	8.55684	38.1413
chr10_136087	24-nt	9.30062	0.00141387	0	0	0	0	0	0	12.3005	66.1668
chr10_136088	24-nt	7.44991	0.00240214	0	0	0.319902	0	0.286761	0	10.9634	63.6793
chr10_241099	24-nt	8.73148	0.00738334	0	0	0	0	0	0	9.89384	39.9654
chr2_77497	24-nt	9.70282	0.000364494	0	0	0	0	0	0	28.8793	75.785
chr2_133550	24-nt	7.9236	0.000481534	0	0	0.319902	0	0	1.19753	13.9049	231.998
chr2_142005	24-nt	9.15095	0.00183989	0	0	0	0	0	0	27.5423	39.4679
chr2_410367	24-nt	7.48556	0.00932307	0.344724	0	0	0	0	0	12.3005	37.3121
chr3_370830	24-nt	9.65687	0.000440344	0	0	0	0	0	0	23.5313	78.2725
chr3_399656	24-nt	9.28609	0.00141387	0	0	0	0	0	0	15.7767	60.6944
chr3_399657	24-nt	10.5434	2.07701e-05	0	0	0	0	0	0	39.308	170.143
chr3_399658	24-nt	8.96895	5.21994e-05	0	0	0.319902	0	0	0	25.4031	123.213
chr3_462065	24-nt	10.9417	3.31677e-06	0	0	0	0	0	0	79.1508	203.144
chr3_462066	24-nt	9.90241	0.00017785	0	0	0	0	0	0	35.297	87.0616
chr4_62900	24-nt	11.587	3.69693e-07	0	0	0	0	0	0	158.569	313.09
chr4_207103	24-nt	8.98893	3.96493e-05	0	0	0.319902	0	0	0	34.2274	114.424
chr4_216540	24-nt	9.34013	0.00116103	0	0	0	0	0	0	18.7181	60.5285
chr4_323793	24-nt	8.72257	0.00697818	0	0	0	0	0	0	31.0185	17.4123
chr4_331308	24-nt	8.83701	0.00507335	0	0	0	0	0	0	31.2859	21.3923
chr4_331309	24-nt	8.75197	0.00694654	0	0	0	0	0	0	13.6375	36.3171
chr4_416986	24-nt	8.79132	0.00697818	0	0	0	0	0	0	6.41763	47.0962
chr4_466271	24-nt	8.72086	0.00790153	0	0	0	0	0	0	7.75463	42.287
chr4_475312	24-nt	10.3446	3.69693e-07	0	0	0.319902	0	0	0	78.3486	343.603
chr4_475313	24-nt	10.4036	2.71813e-05	0	0	0	0	0	0	53.7476	128.685
chr5_61436	24-nt	9.53646	0.000568387	0	0	0	0	0	0	33.6926	57.0461
chr5_61437	24-nt	8.99974	0.00452164	0	0	0	0	0	0	4.01102	61.1918
chr5_180660	24-nt	9.39057	0.00116103	0	0	0	0	0	0	11.2309	73.795
chr5_190991	24-nt	11.2182	1.73832e-06	0	0	0	0	0	0	61.5023	303.14
chr5_203699	24-nt	9.34914	0.00109468	0	0	0	0	0	0	28.3445	50.0811
chr5_203700	24-nt	11.1864	1.73832e-06	0	0	0	0	0	0	95.4622	248.913
chr5_203701	24-nt	8.85714	9.79256e-07	0.344724	0	0.319902	0	0.286761	0	78.3486	199.661
chr5_388620	24-nt	9.66315	2.92276e-06	0	0	0.319902	0	0	0	54.2824	194.023
chr5_388621	24-nt	8.58312	2.55522e-05	0.344724	0.369149	0	0	0	0	31.8207	149.083
chr5_396070	24-nt	10.4913	2.83111e-05	0	0	0	0	0	0	20.0551	189.711
chr6_27100	24-nt	10.5672	1.77778e-05	0	0	0	0	0	0	54.015	155.55
chr8_287504	24-nt	9.01539	0.0029296	0	0	0	0	0	0	18.4507	42.4529
chr9_229671	24-nt	9.42526	0.000998435	0	0	0	0	0	0	16.8463	68.6543
chr9_229672	24-nt	9.1524	0.00204617	0	0	0	0	0	0	14.4397	54.3928

[truncated: 4 more sheets: S11, S12, S13, 14]
